# Supplementary material for: SMC1α Substitutes for Many Meiotic Functions of SMC1β but Cannot Protect Telomeres from Damage
Source: PubMed Central journal article supplement — Curr Biol. 2018 Jan 22;28(2):249–261.e4. doi: 10.1016/j.cub.2017.12.020 (PMC5788747; doi:10.1016/j.cub.2017.12.020), 2018-01-22
Supplement: mmc1.pdf [file mmc1.pdf]

**Current Biology, Volume 28**

**Supplemental Information**

**SMC1 $\alpha$  Substitutes for Many Meiotic Functions  
of SMC1 $\beta$  but Cannot Protect Telomeres from Damage**

**Uddipta Biswas, Michelle Stevense, and Rolf Jessberger**

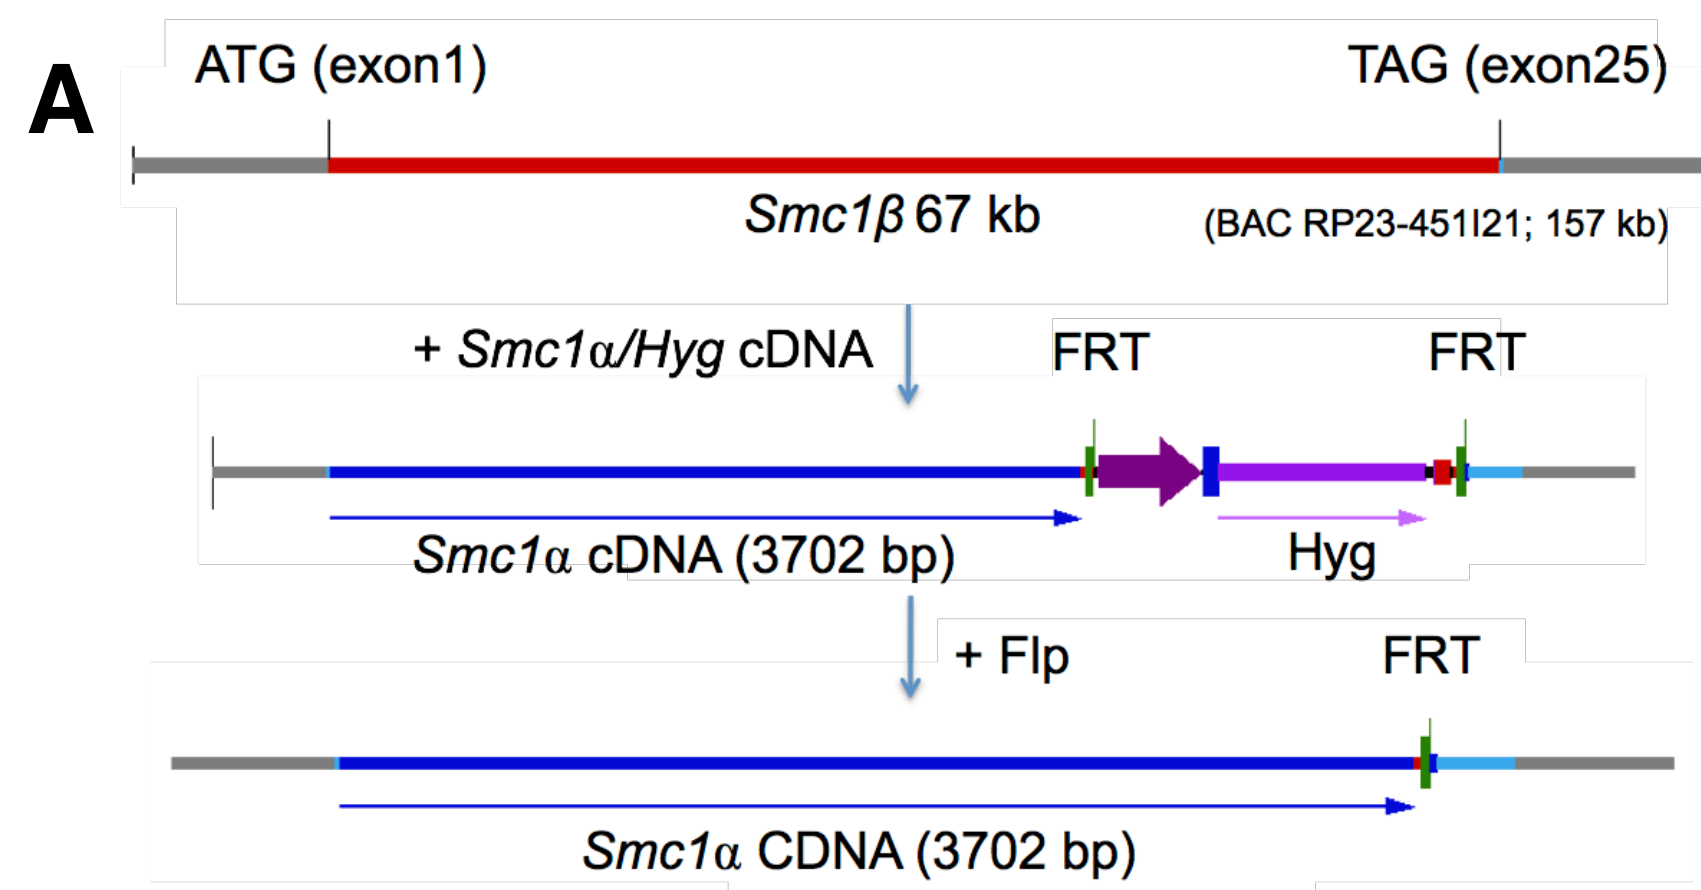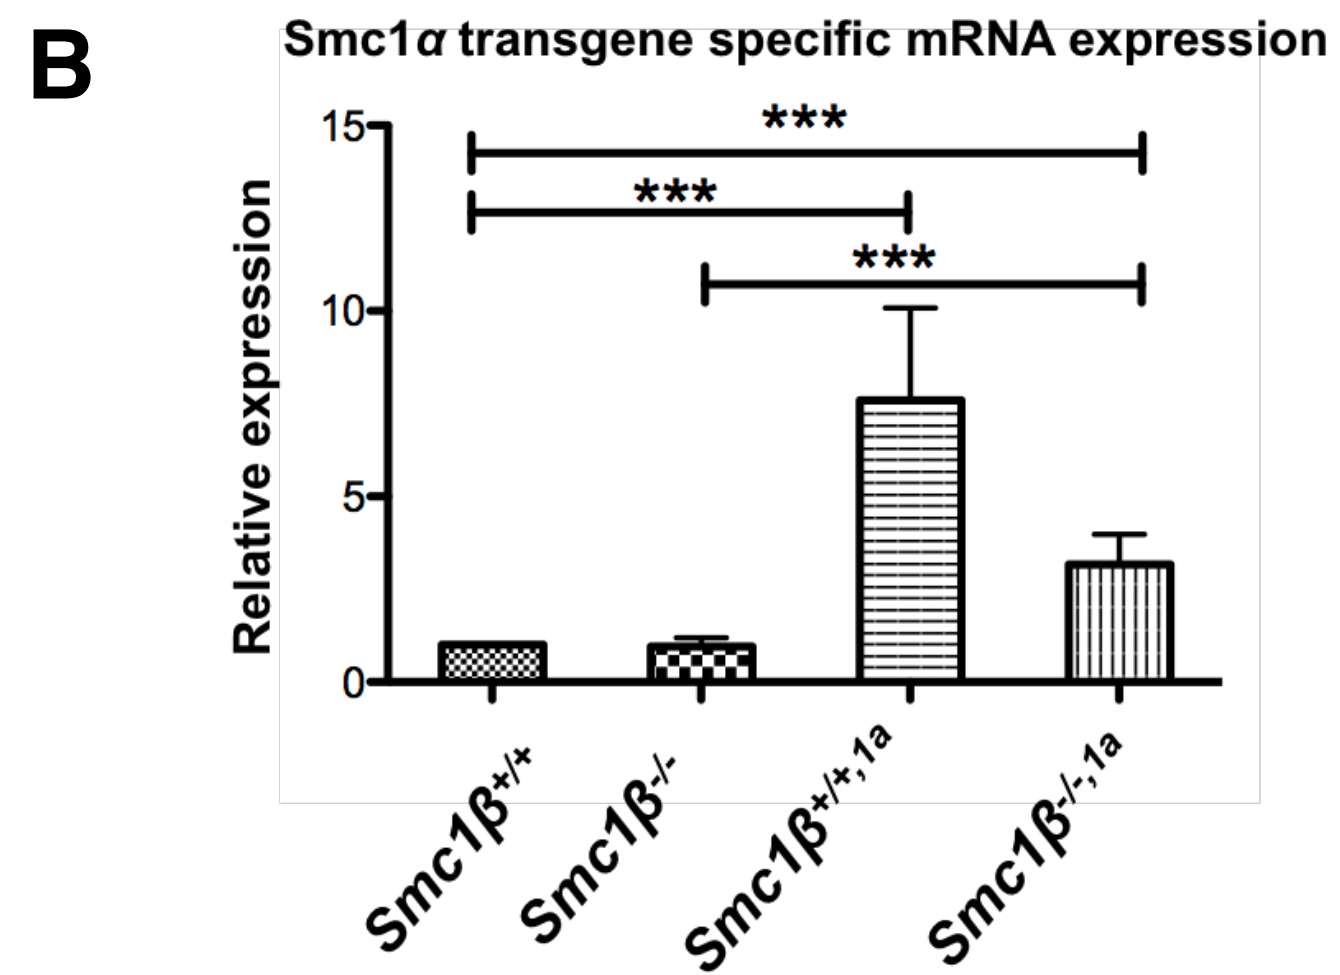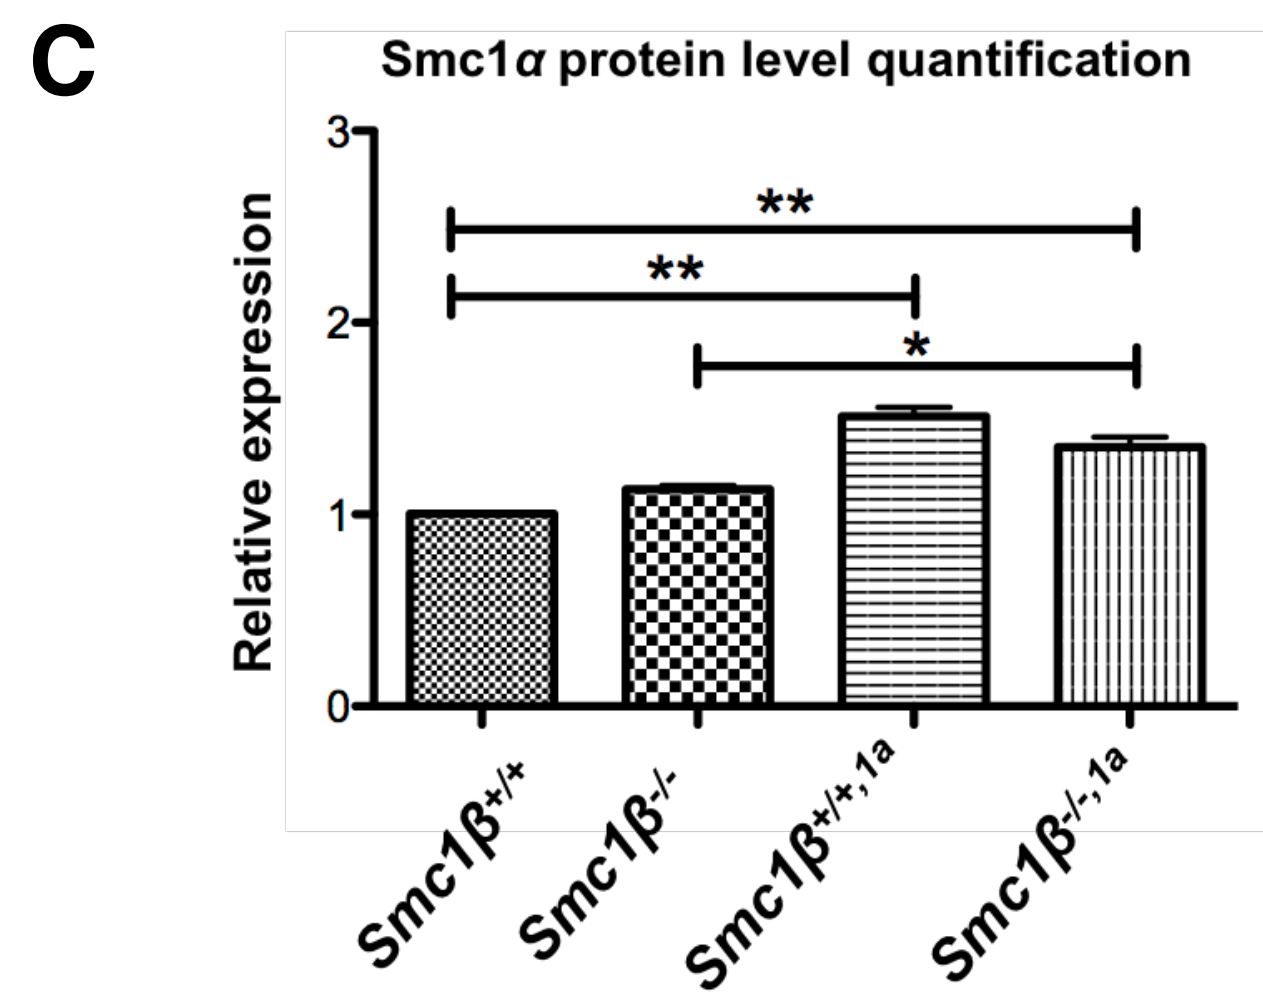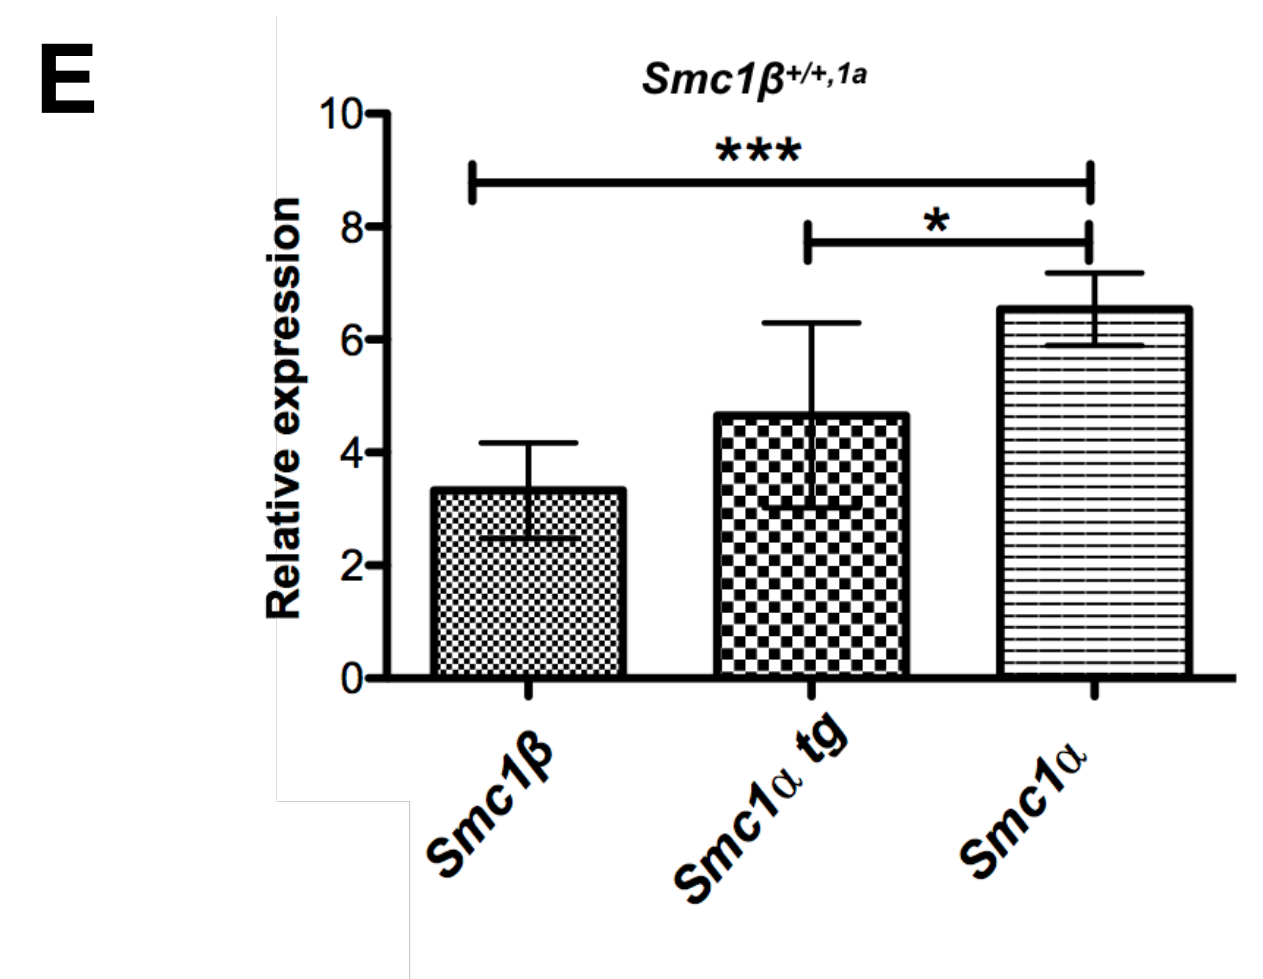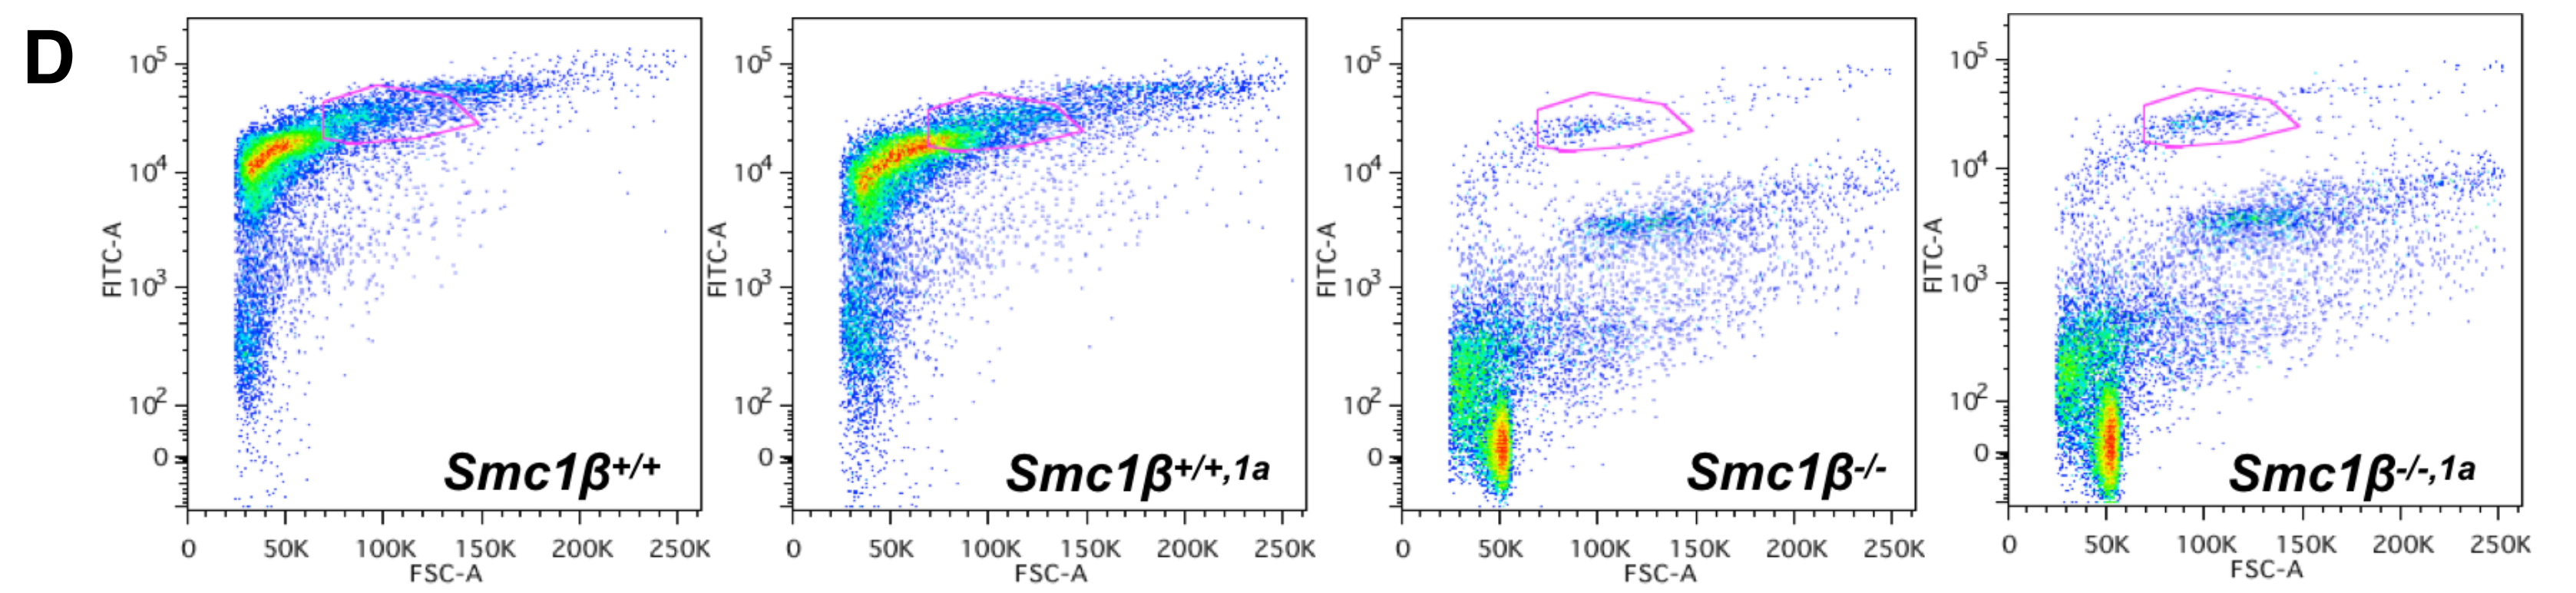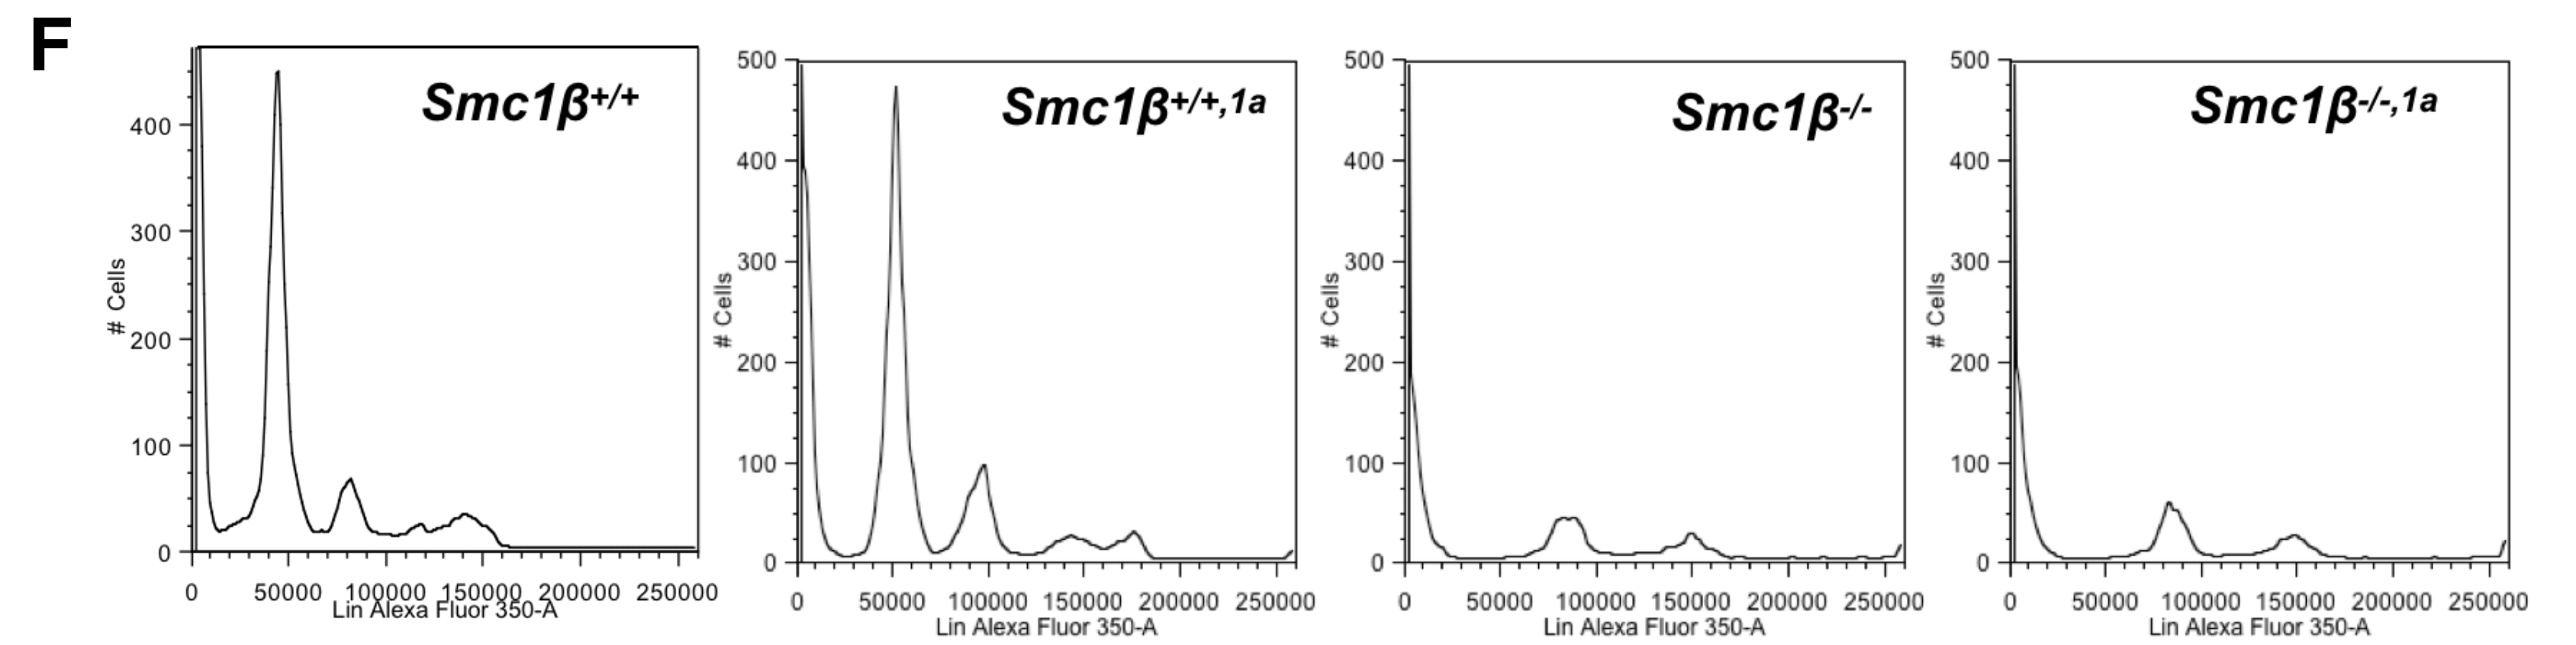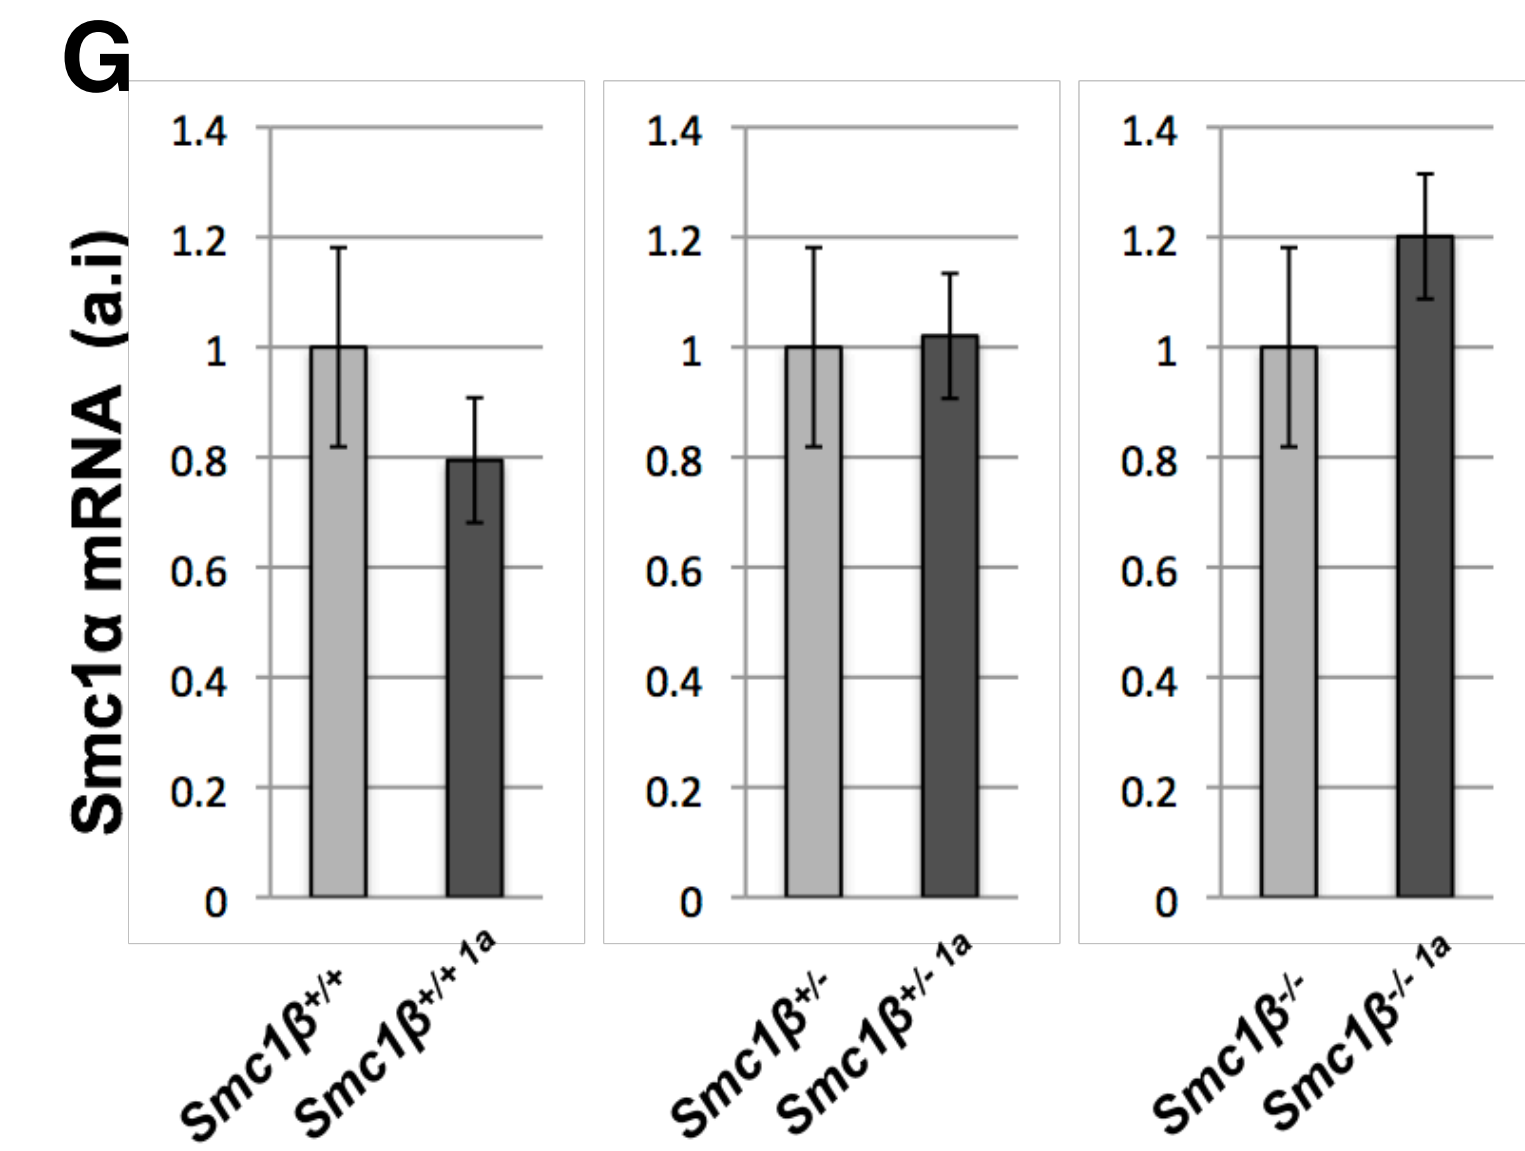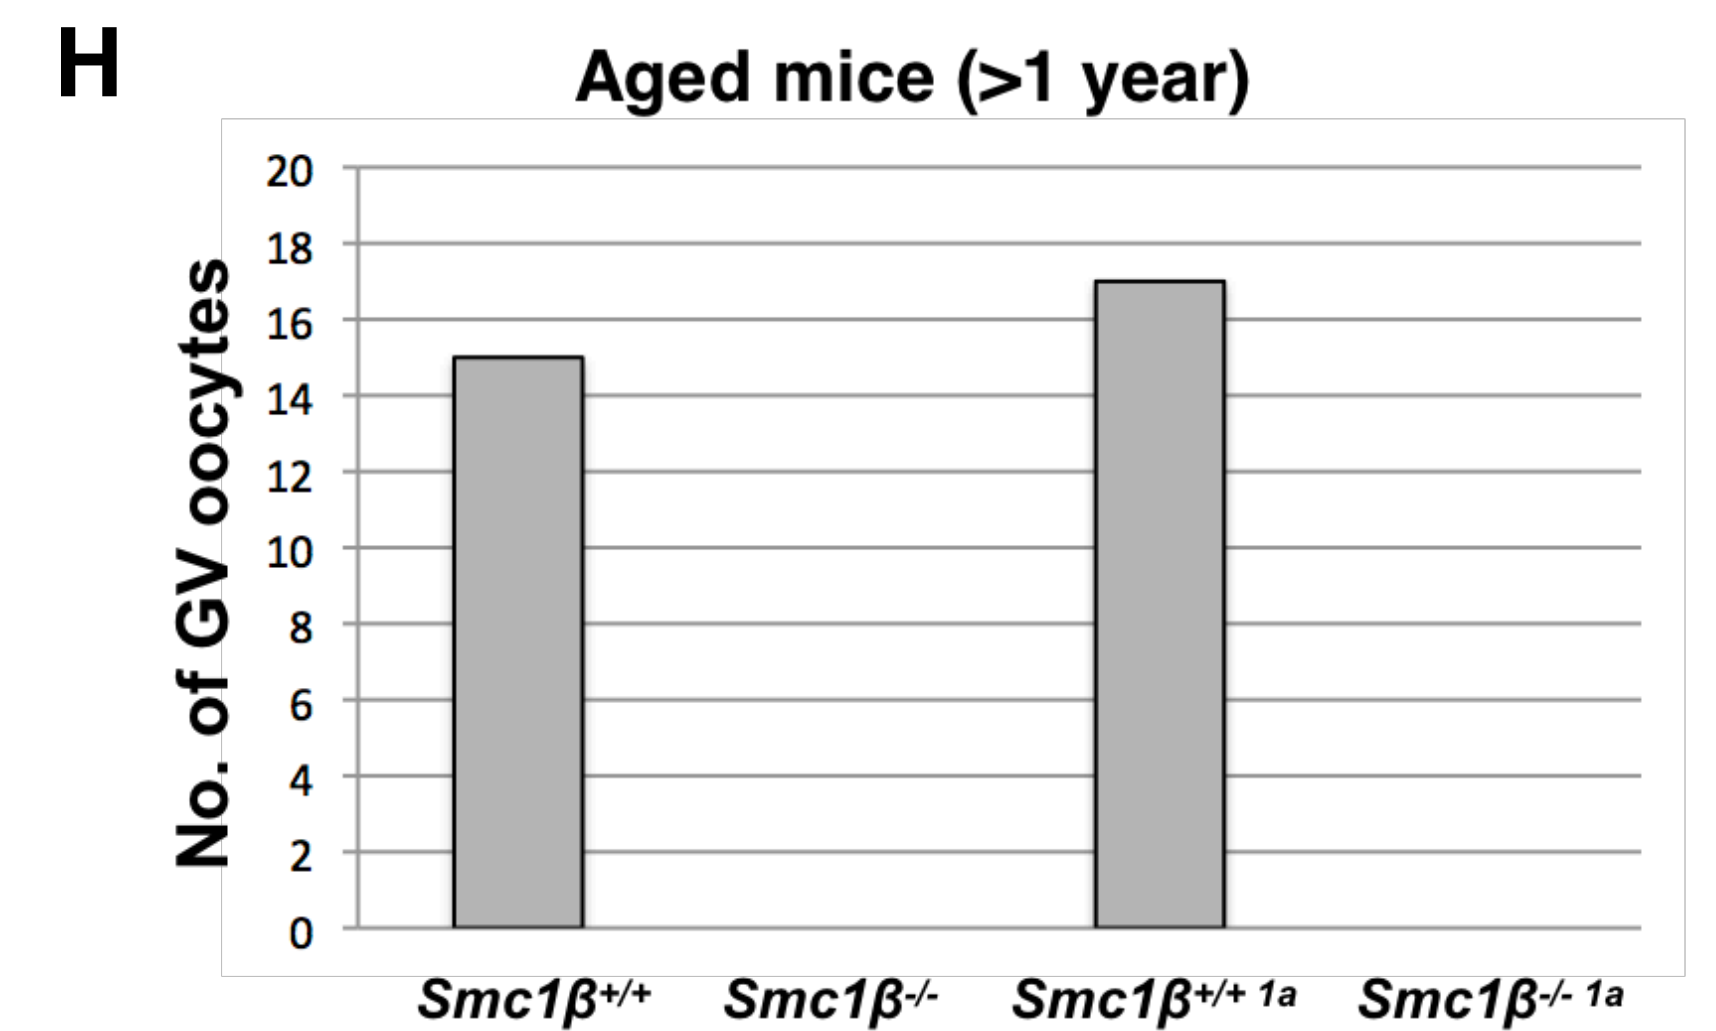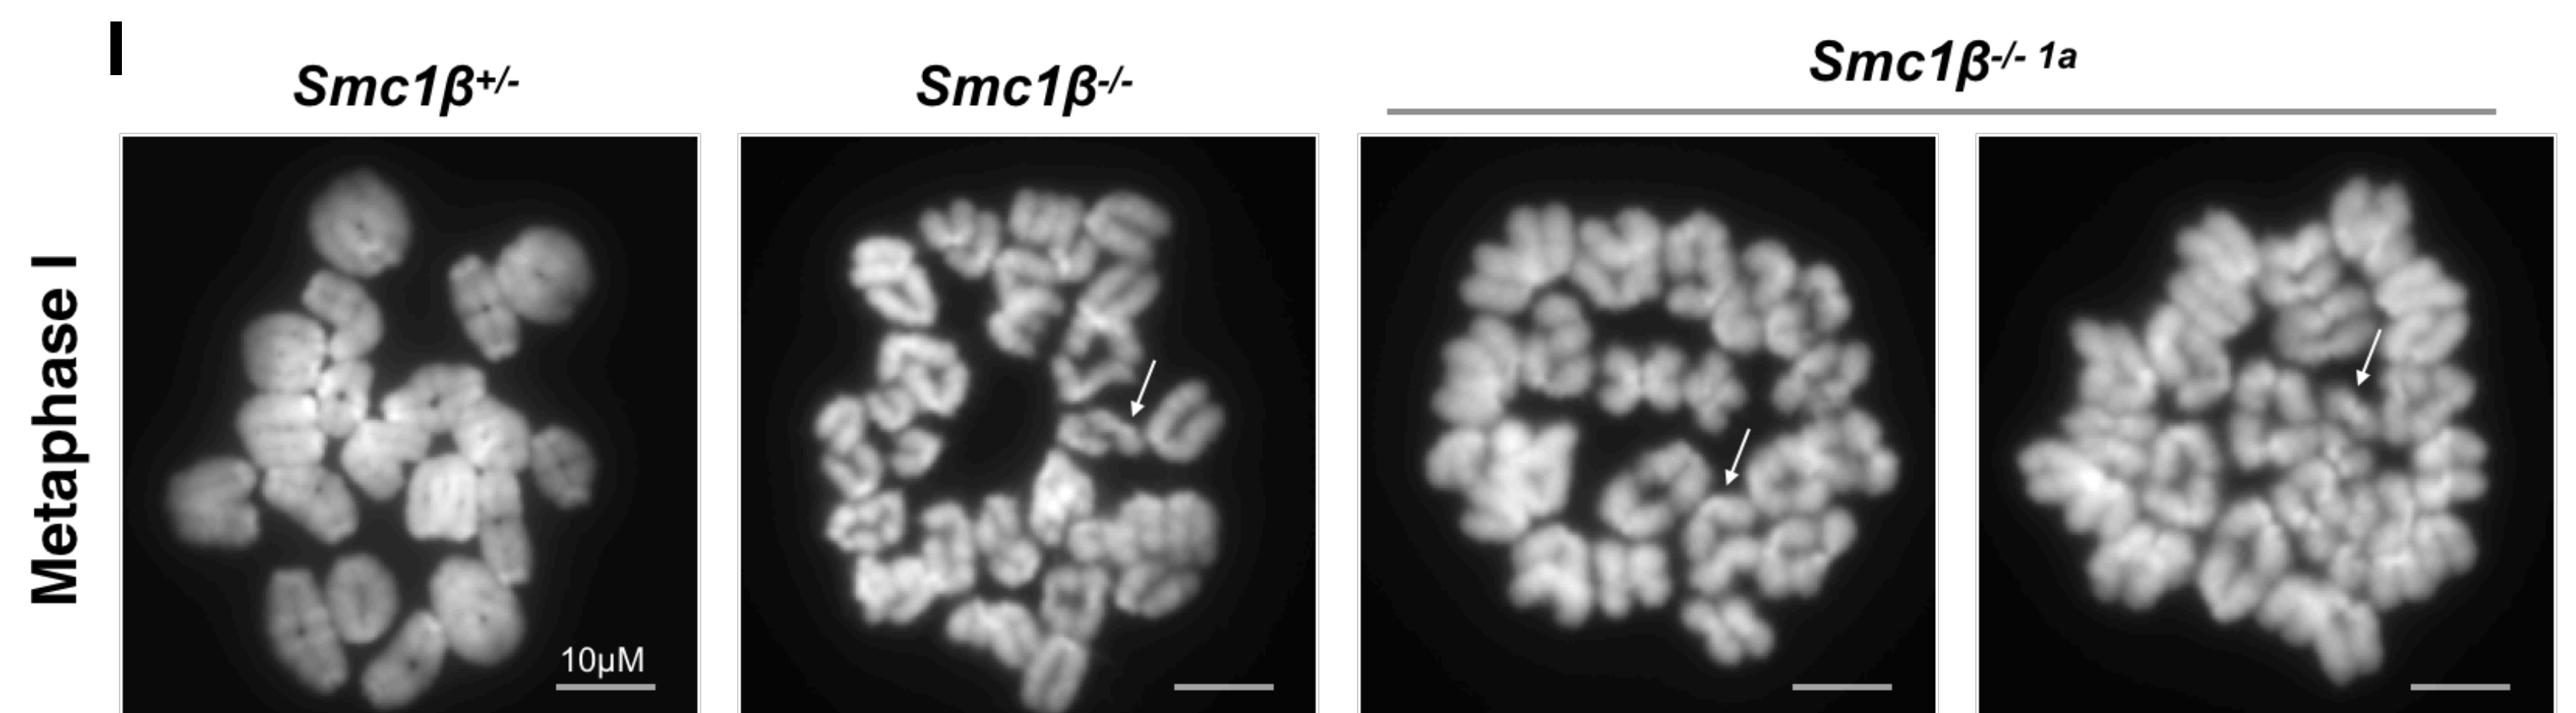

**Figure S1. Experimental approach. Related to Figure 1:** (A) Schematic diagram for SMC1 $\alpha$  BAC generation. The *Smc1a* cDNA-FRT-hyg-FRT template was cloned into the R6k plasmid. Next the cDNA-FRT-hyg-FRT fragment was released from R6k and integrated into the BAC RP23-451I21. For the integration into the BAC, homology arms of each 40 bp upstream of the *Smc1 $\beta$*  ATG and 40 bp downstream of the *Smc1 $\beta$*  TAG were used. Before the pronuclear microinjection, the selection marker (hyg) was removed using Flp recombinase. (B) Sorting strategy for the protein and RNA isolation. GFP positive spermatocytes are sorted from all the genotypes (C) Cell cycle analysis of the spermatocytes of all genotypes. (D to F) Transgene mRNA and protein quantification: (D) Quantification of transgene specific *Smc1a* expression. *Smc1a* expression levels were normalised to *Smc1a* levels in *Smc1 $\beta$ <sup>+/+</sup>* spermatocytes. According to Bonferroni's multiple comparison test the mean values for *Smc1a* expression of all genotypes (*Smc1 $\beta$ <sup>+/+,1a</sup>* : 7.5881 +/- 2.49 ; *Smc1 $\beta$ <sup>-/-</sup>* : 0.9558 +/- 0.3378 and *Smc1 $\beta$ <sup>-/-,1a</sup>* : 3.174 +/- 0.8114) are significantly different (p<0.05). (E) Quantification of SMC1 $\alpha$  protein levels (N=2). The ratio was calculated by normalizing SMC1 $\alpha$  with tubulin levels within the same genotypes and for comparison the relative levels were normalized to *Smc1 $\beta$ <sup>+/+</sup>* levels. *Smc1 $\beta$ <sup>+/+,1a</sup>* : 1.5 (mean) +/- 0.006 (SD) ; *Smc1 $\beta$ <sup>-/-</sup>* : 1.132 +/- 0.0018 and *Smc1 $\beta$ <sup>-/-,1a</sup>* : 1.351 +/- 0.053) (p<0.05). (F) Expression levels in FACS-sorted 4N *Smc1 $\beta$ <sup>+/+1a</sup>* spermatocytes of *Smc1a* (endogenous and transgene), *Smc1a* transgene only, and *Smc1 $\beta$*  was measured by real-time PCR. Turkey's multiple comparison test showed no statistically significant difference between *Smc1a* transgene (tg) and *Smc1 $\beta$*  expression (p > 0.05), while the total *Smc1a* expression was higher as expected (p < 0.05). (G to H) *Smc1 $\beta$* prom-*Smc1a* transgenic oocytes: (G) mRNA levels of *Smc1 $\beta$* prom-*Smc1a* transgene in adult oocytes. qPCR data for adult female *Smc1 $\beta$ <sup>+/+</sup>*, *Smc1 $\beta$ <sup>+/-</sup>* or *Smc1 $\beta$ <sup>-/-</sup>* mice strains, which were genotyped as either negative (light grey) or positive (dark grey) for the *Smc1 $\beta$* prom-*Smc1a* transgene. Each bar represents the level of the *Smc1 $\beta$* prom-*Smc1a* transgene mRNA in 50 GV oocytes (a.i.). The data was normalised to the house-keeping gene *Rsp16* and the data was set to 1 for each *Smc1 $\beta$* prom-*Smc1a* transgene negative mouse. (H) Number of GV oocytes in aged mice. Graph shows number of GV oocytes recovered from both ovaries of aged mice between 61 to 67 weeks old. One representative data set is presented. The same was observed in multiple independent experiments. (I) Chromosome spreads of adult oocytes. Images show representative examples of chromosome spreads at metaphase I (MI). Mice were between 6 to 8 weeks old. *Smc1 $\beta$ <sup>+/-</sup>* and *Smc1 $\beta$ <sup>-/-</sup>* cells were used as controls, to illustrate loss of cohesion in the *Smc1 $\beta$ <sup>-/-</sup>* strain. Two examples of *Smc1 $\beta$ <sup>-/-,1a</sup>* cells are presented. Cells were stained with DAPI (scale bar 10  $\mu$ M).

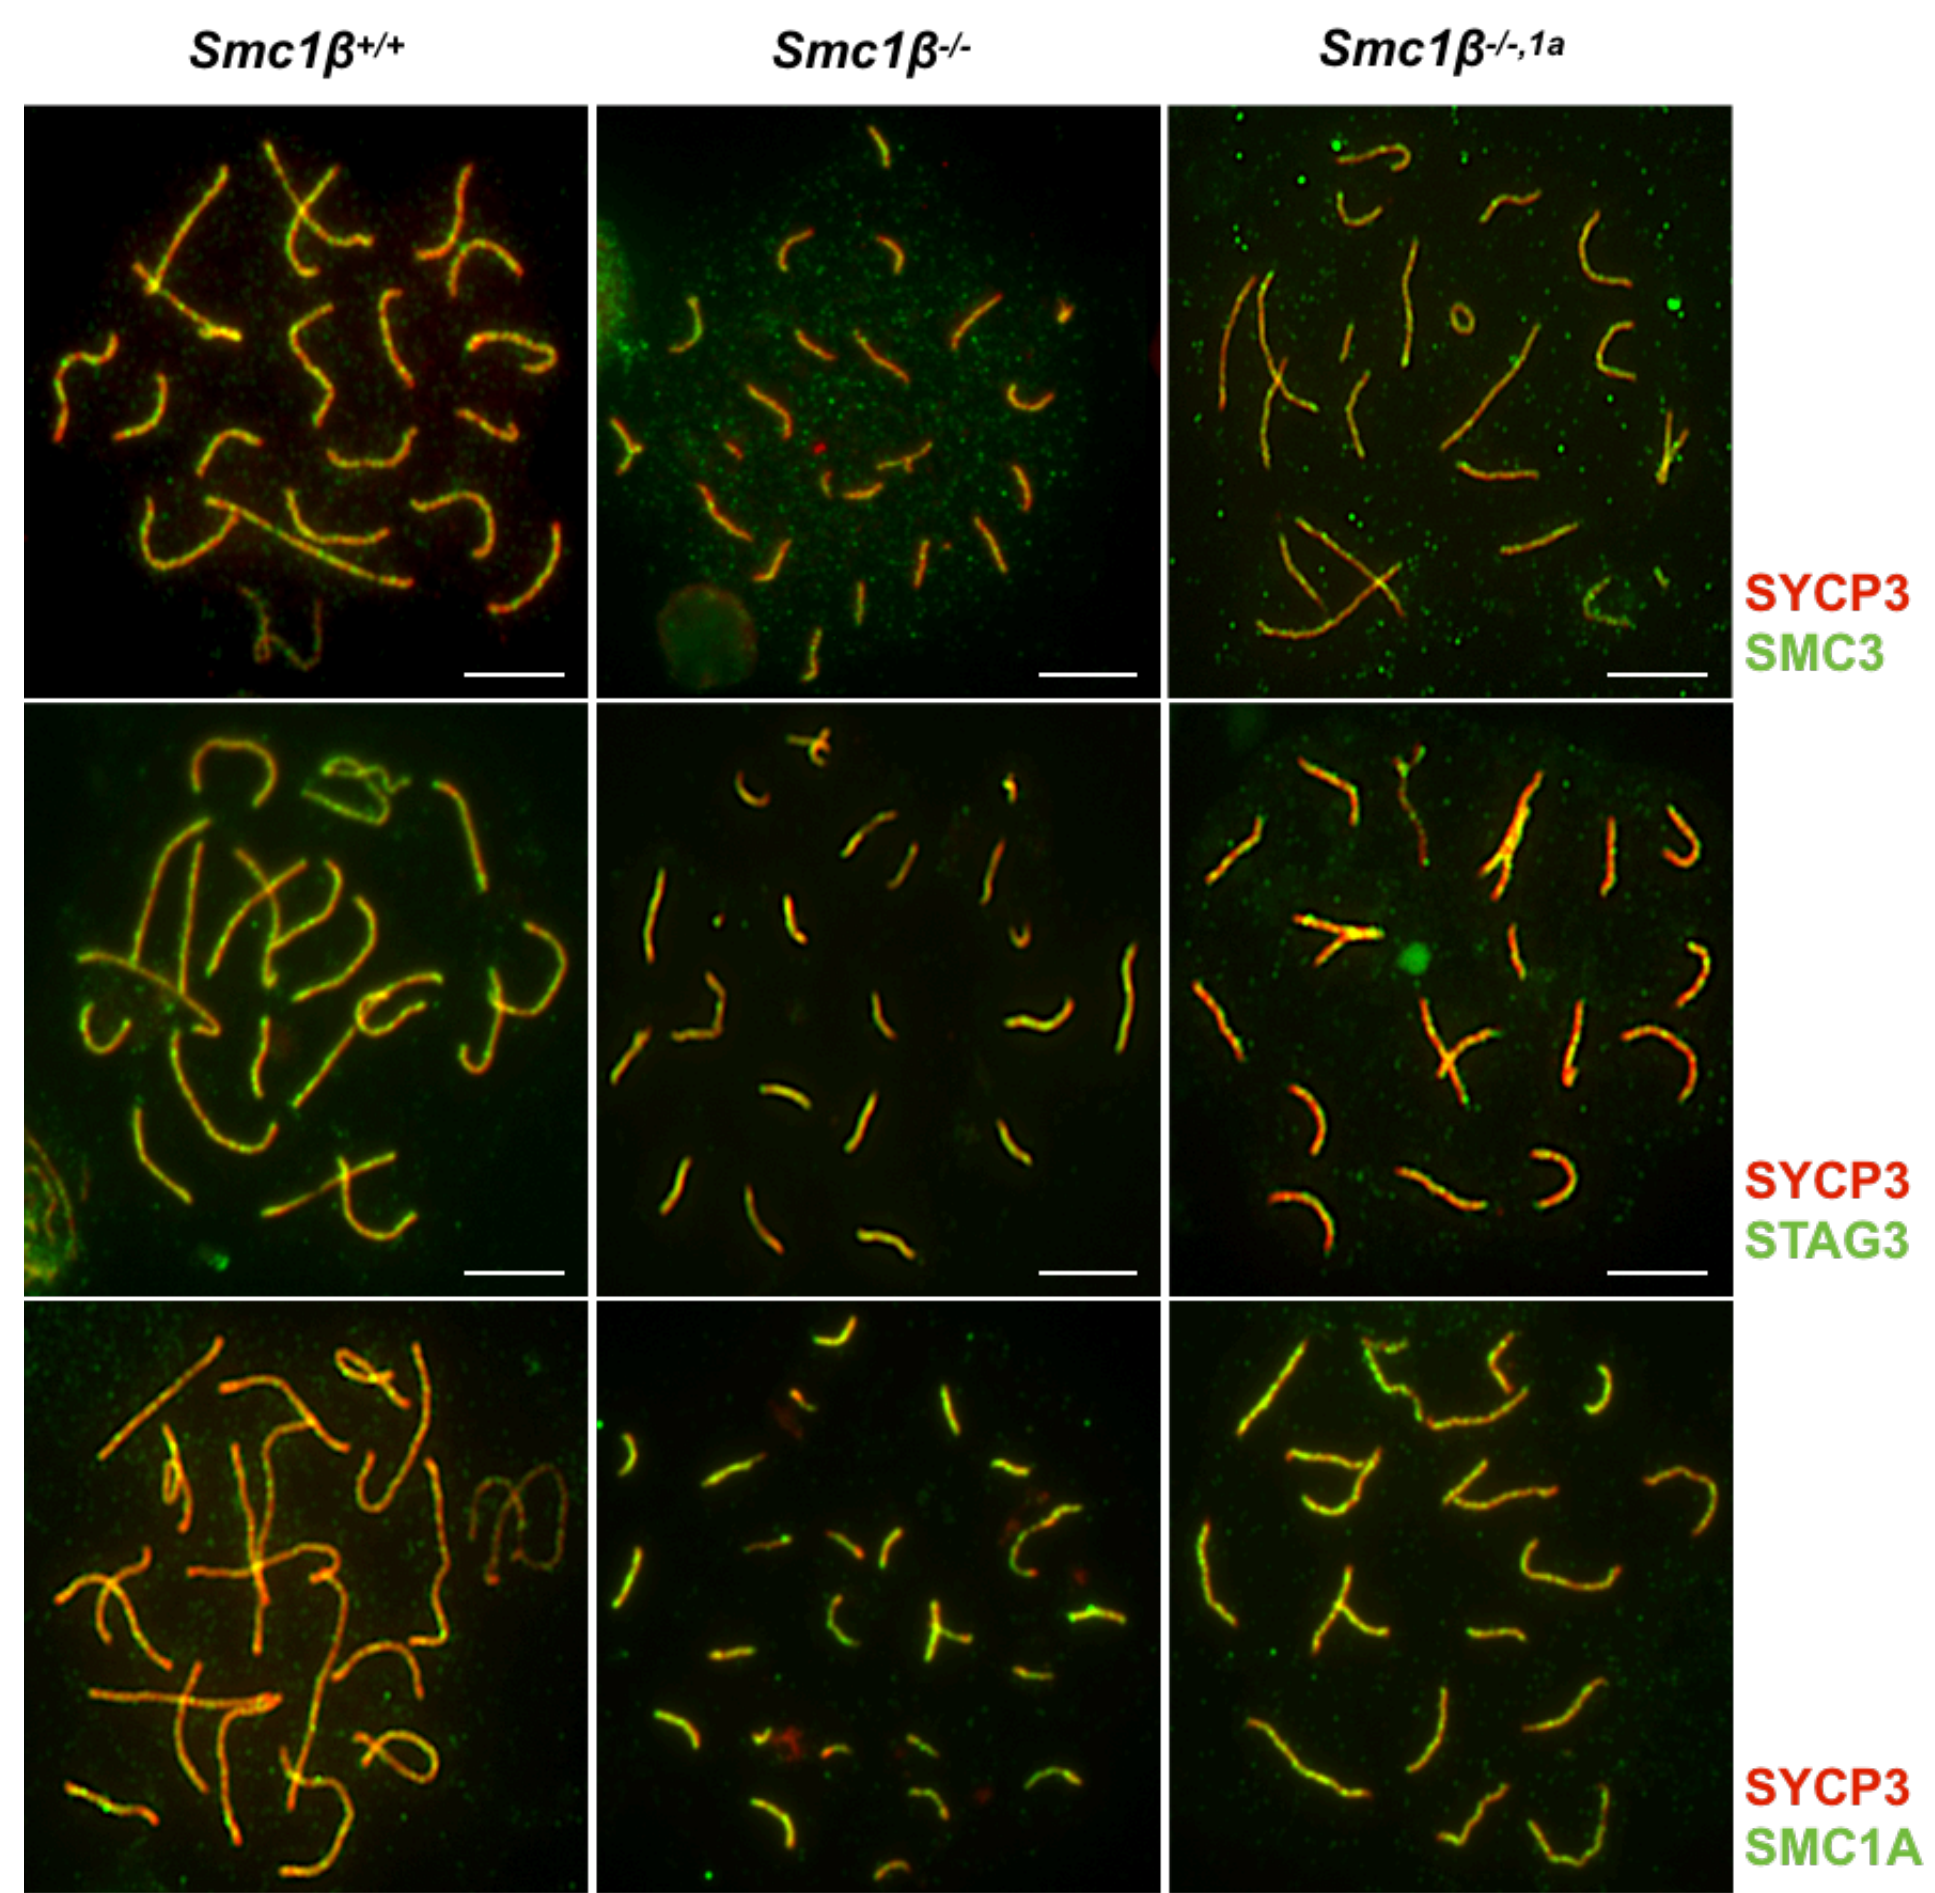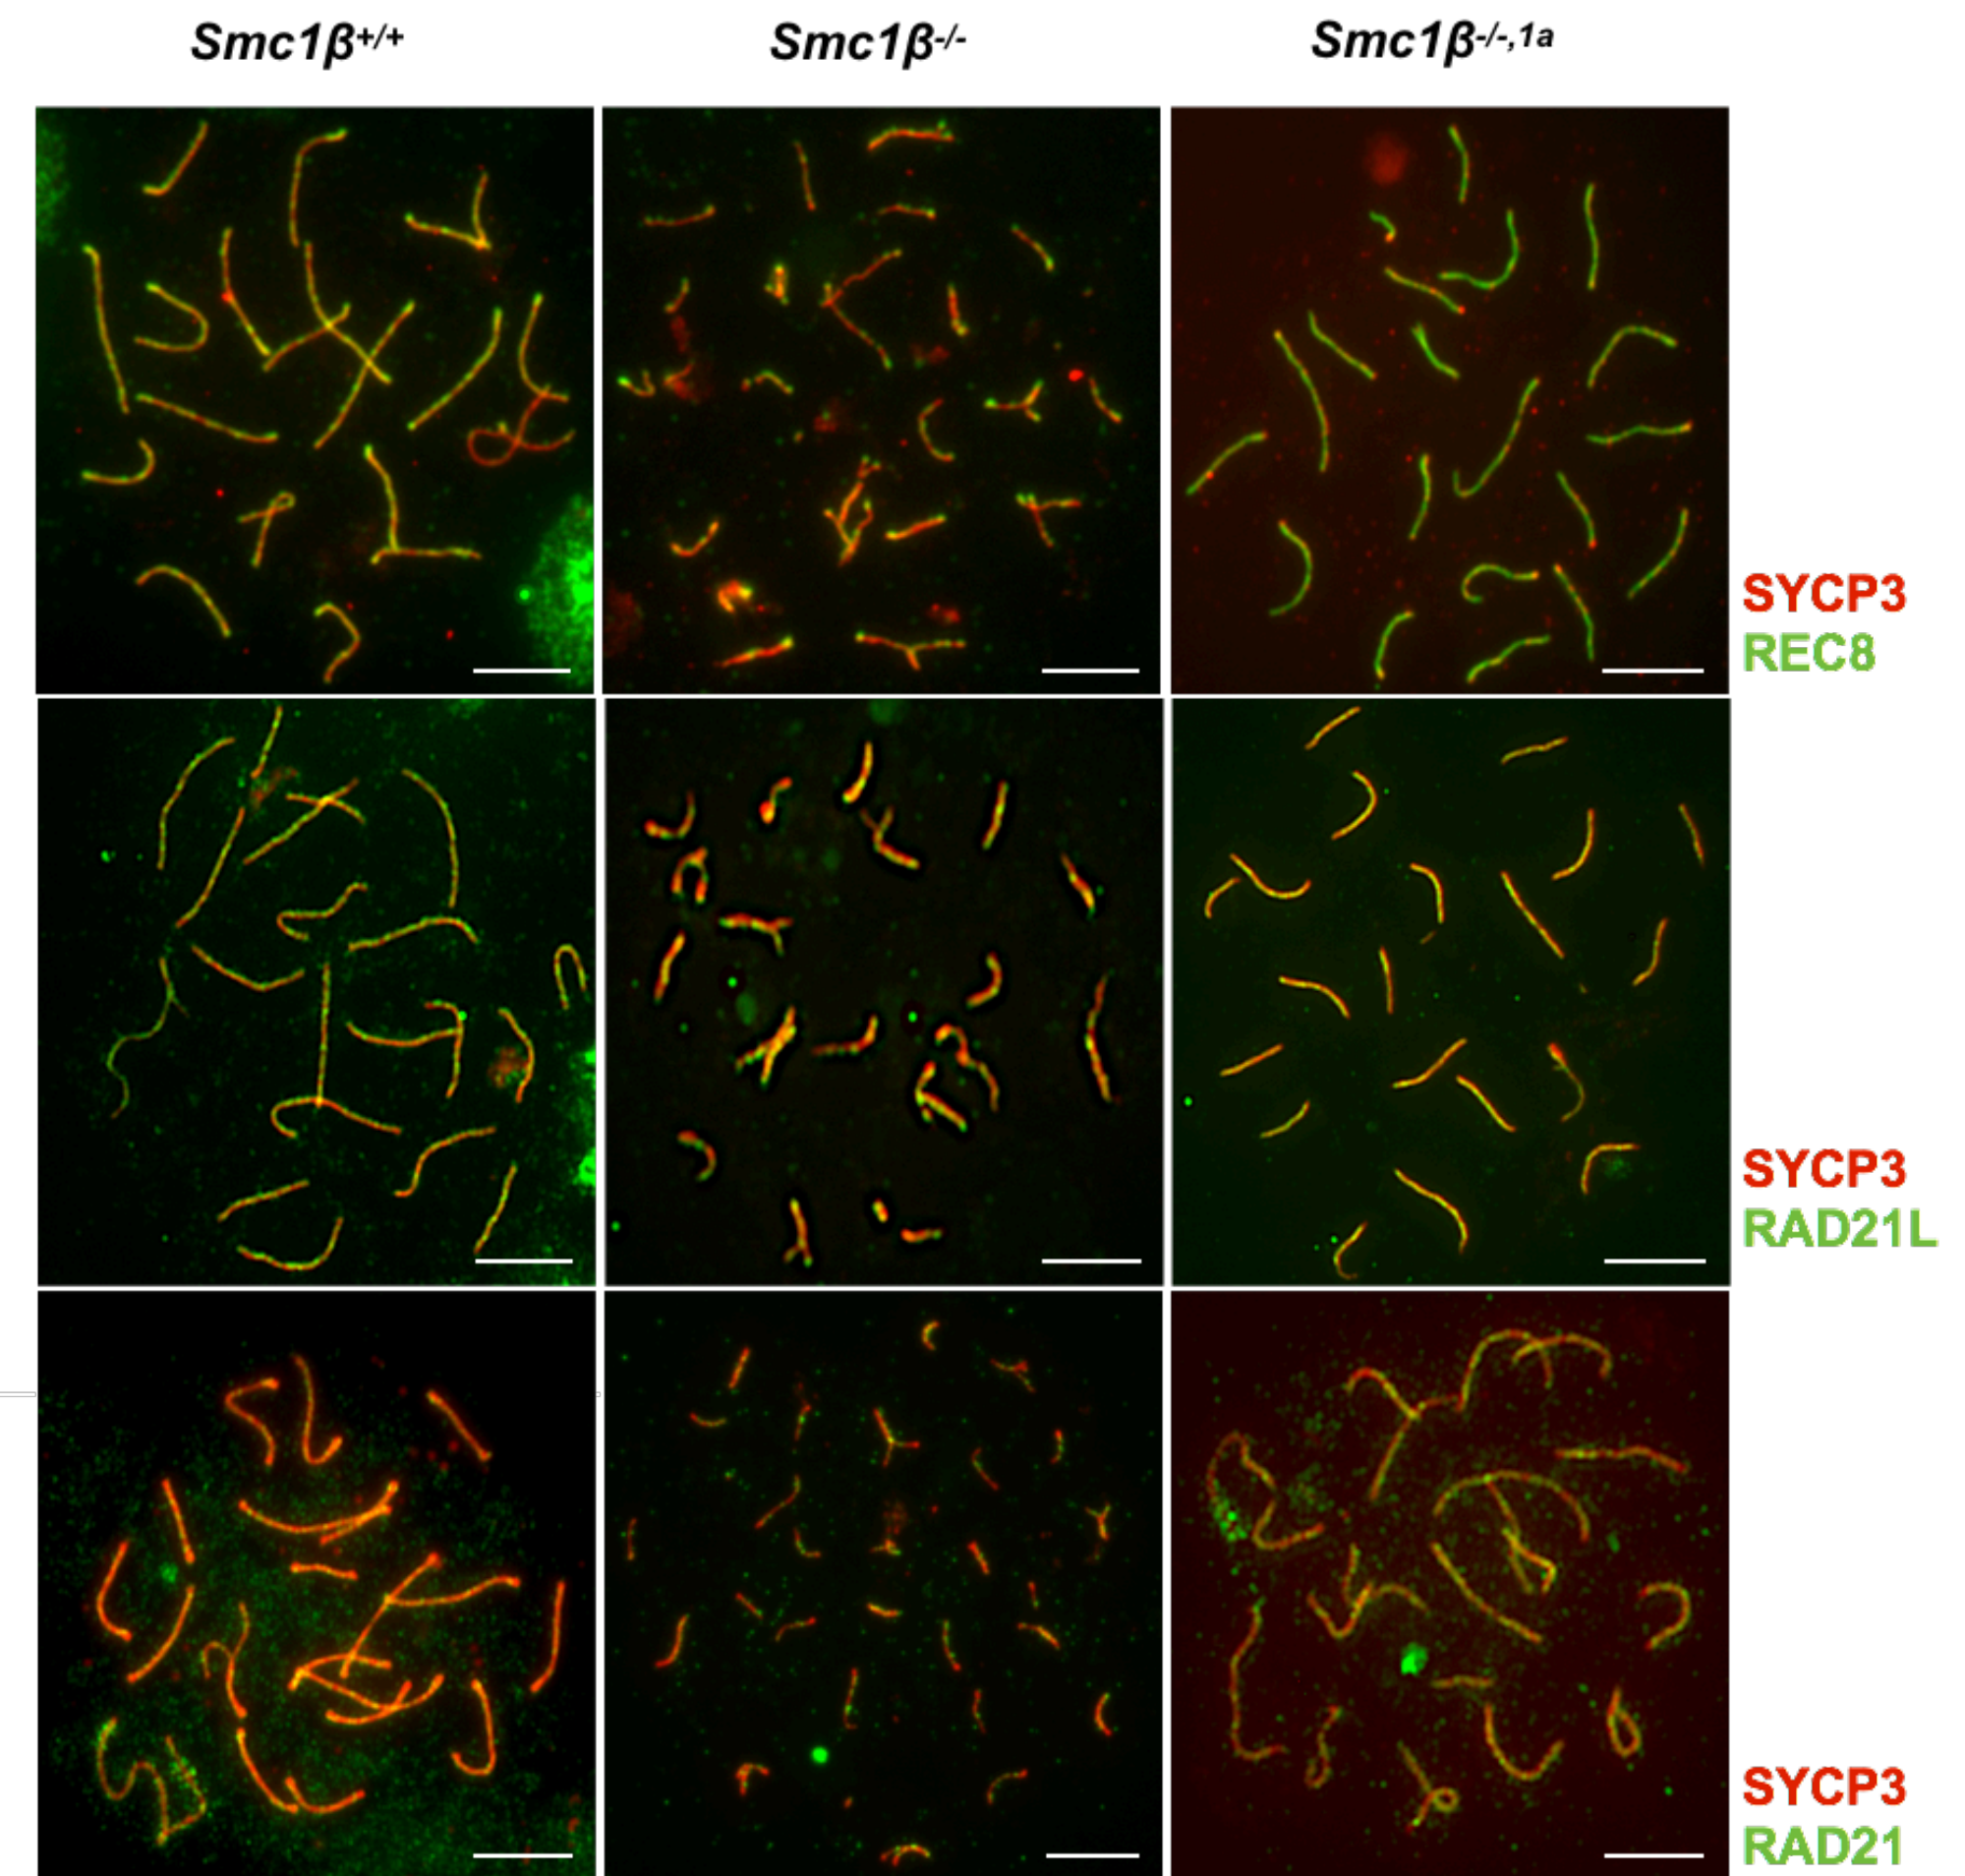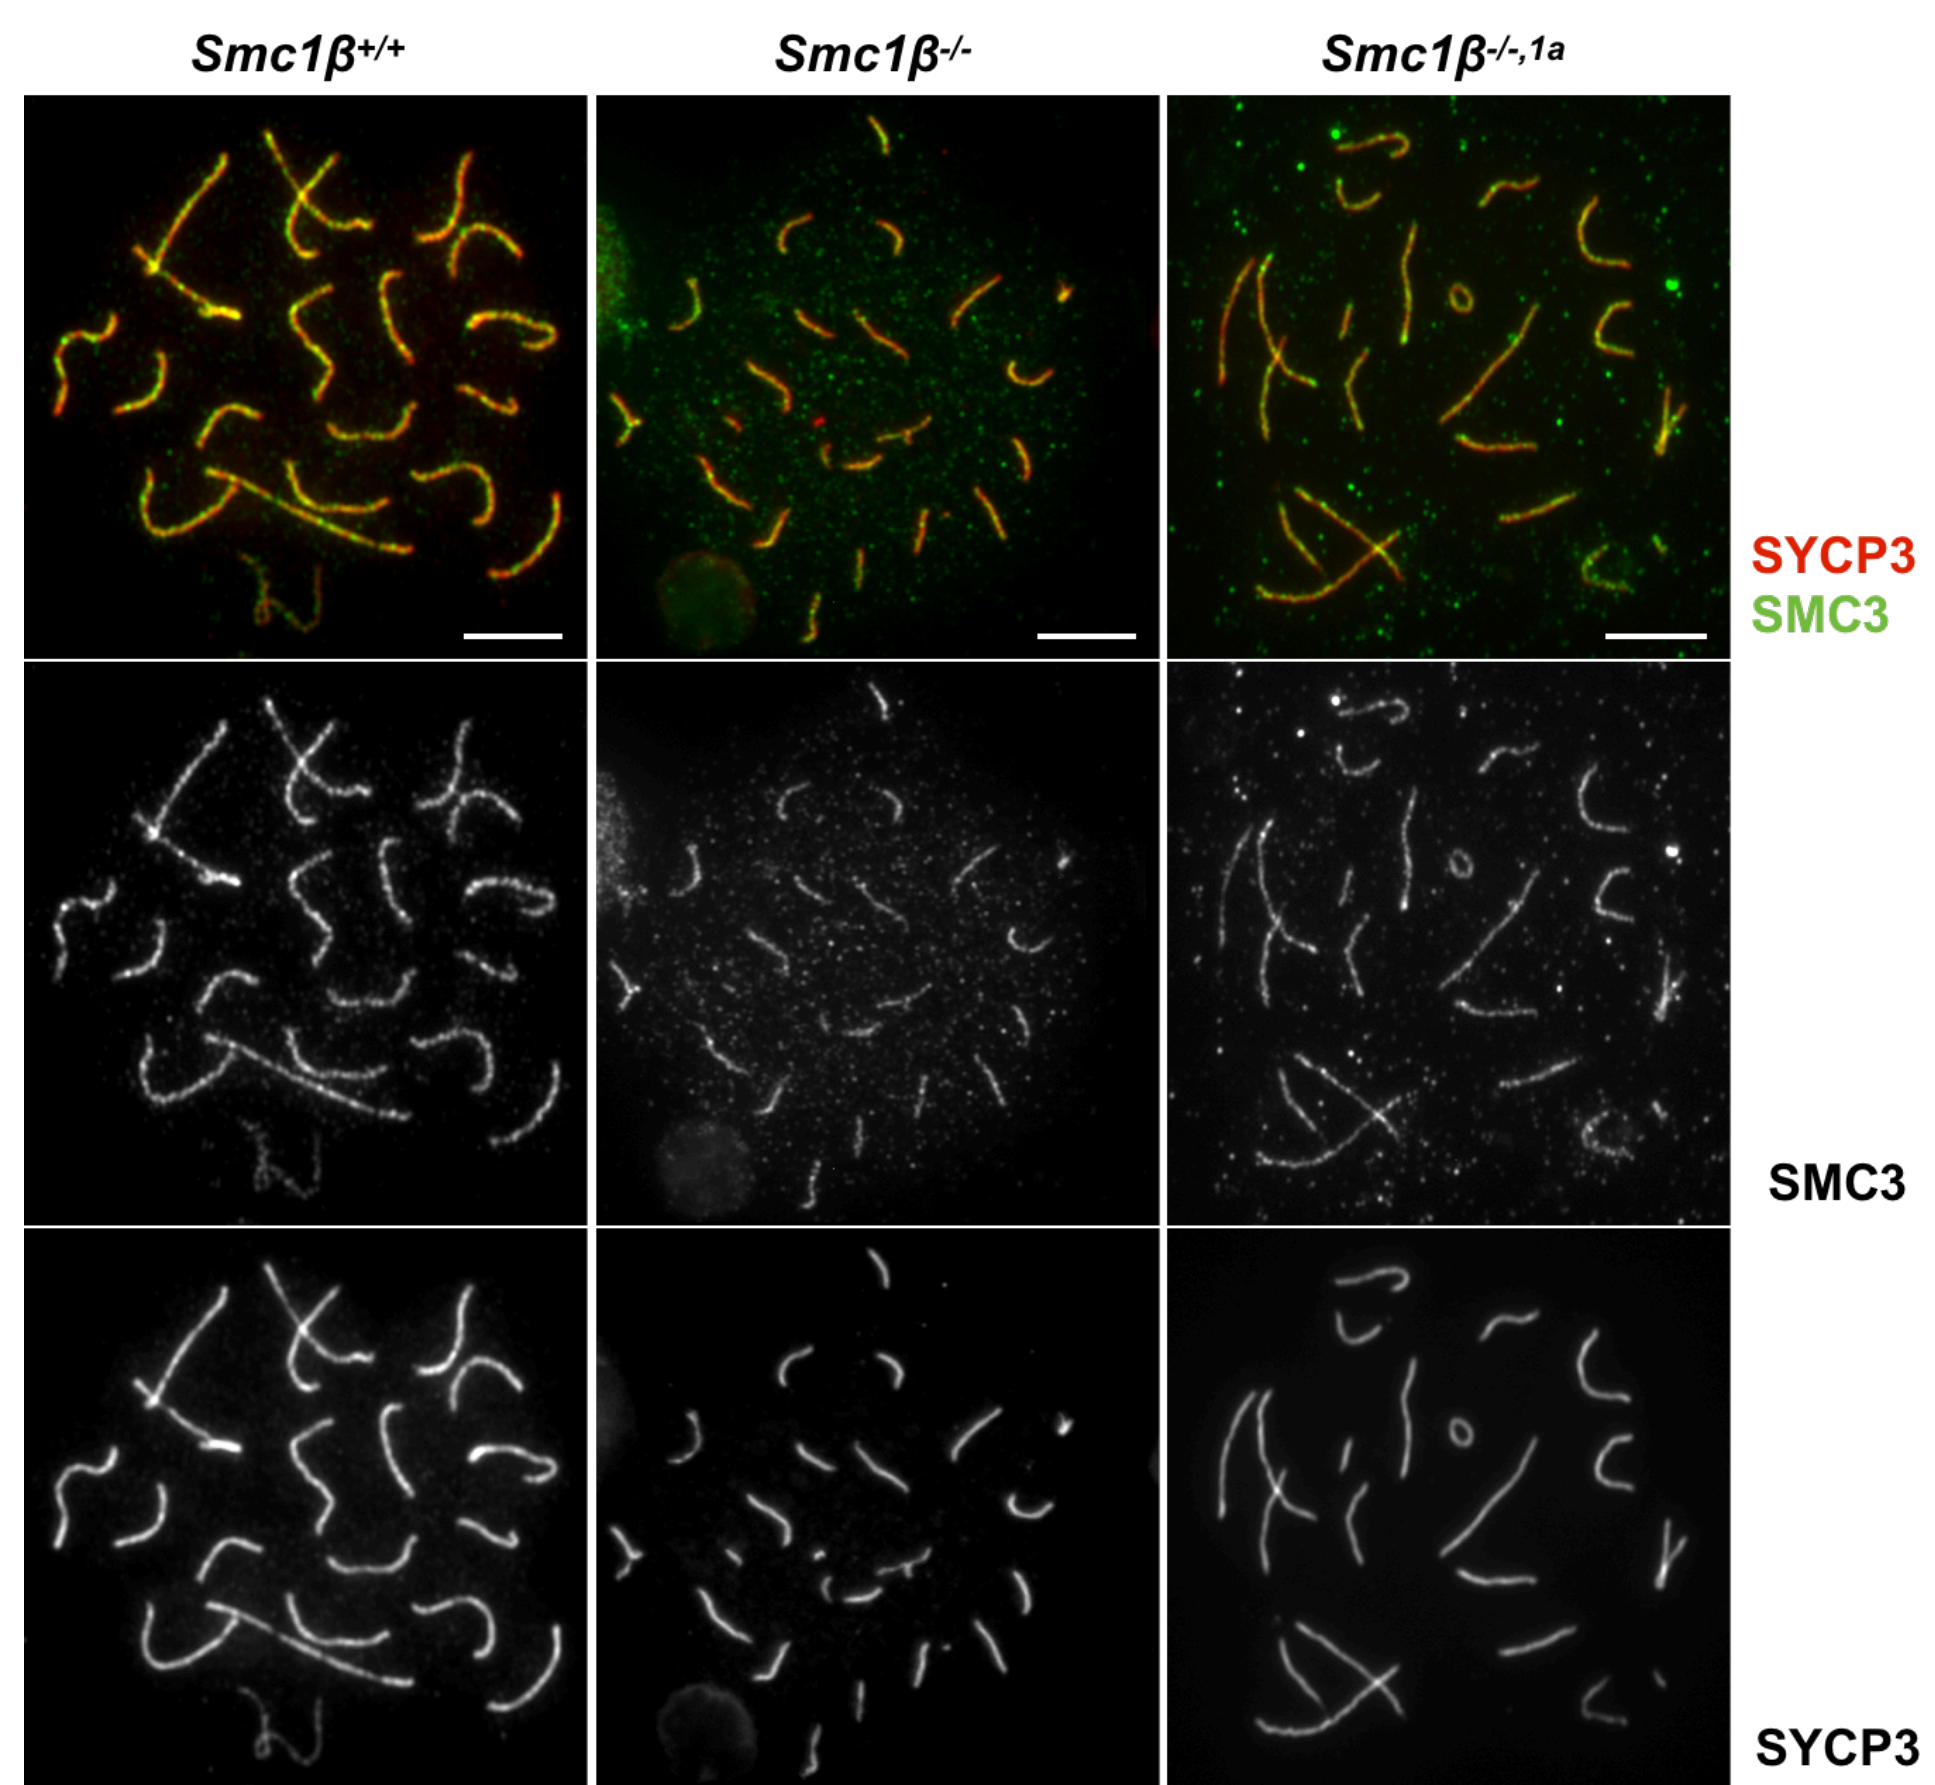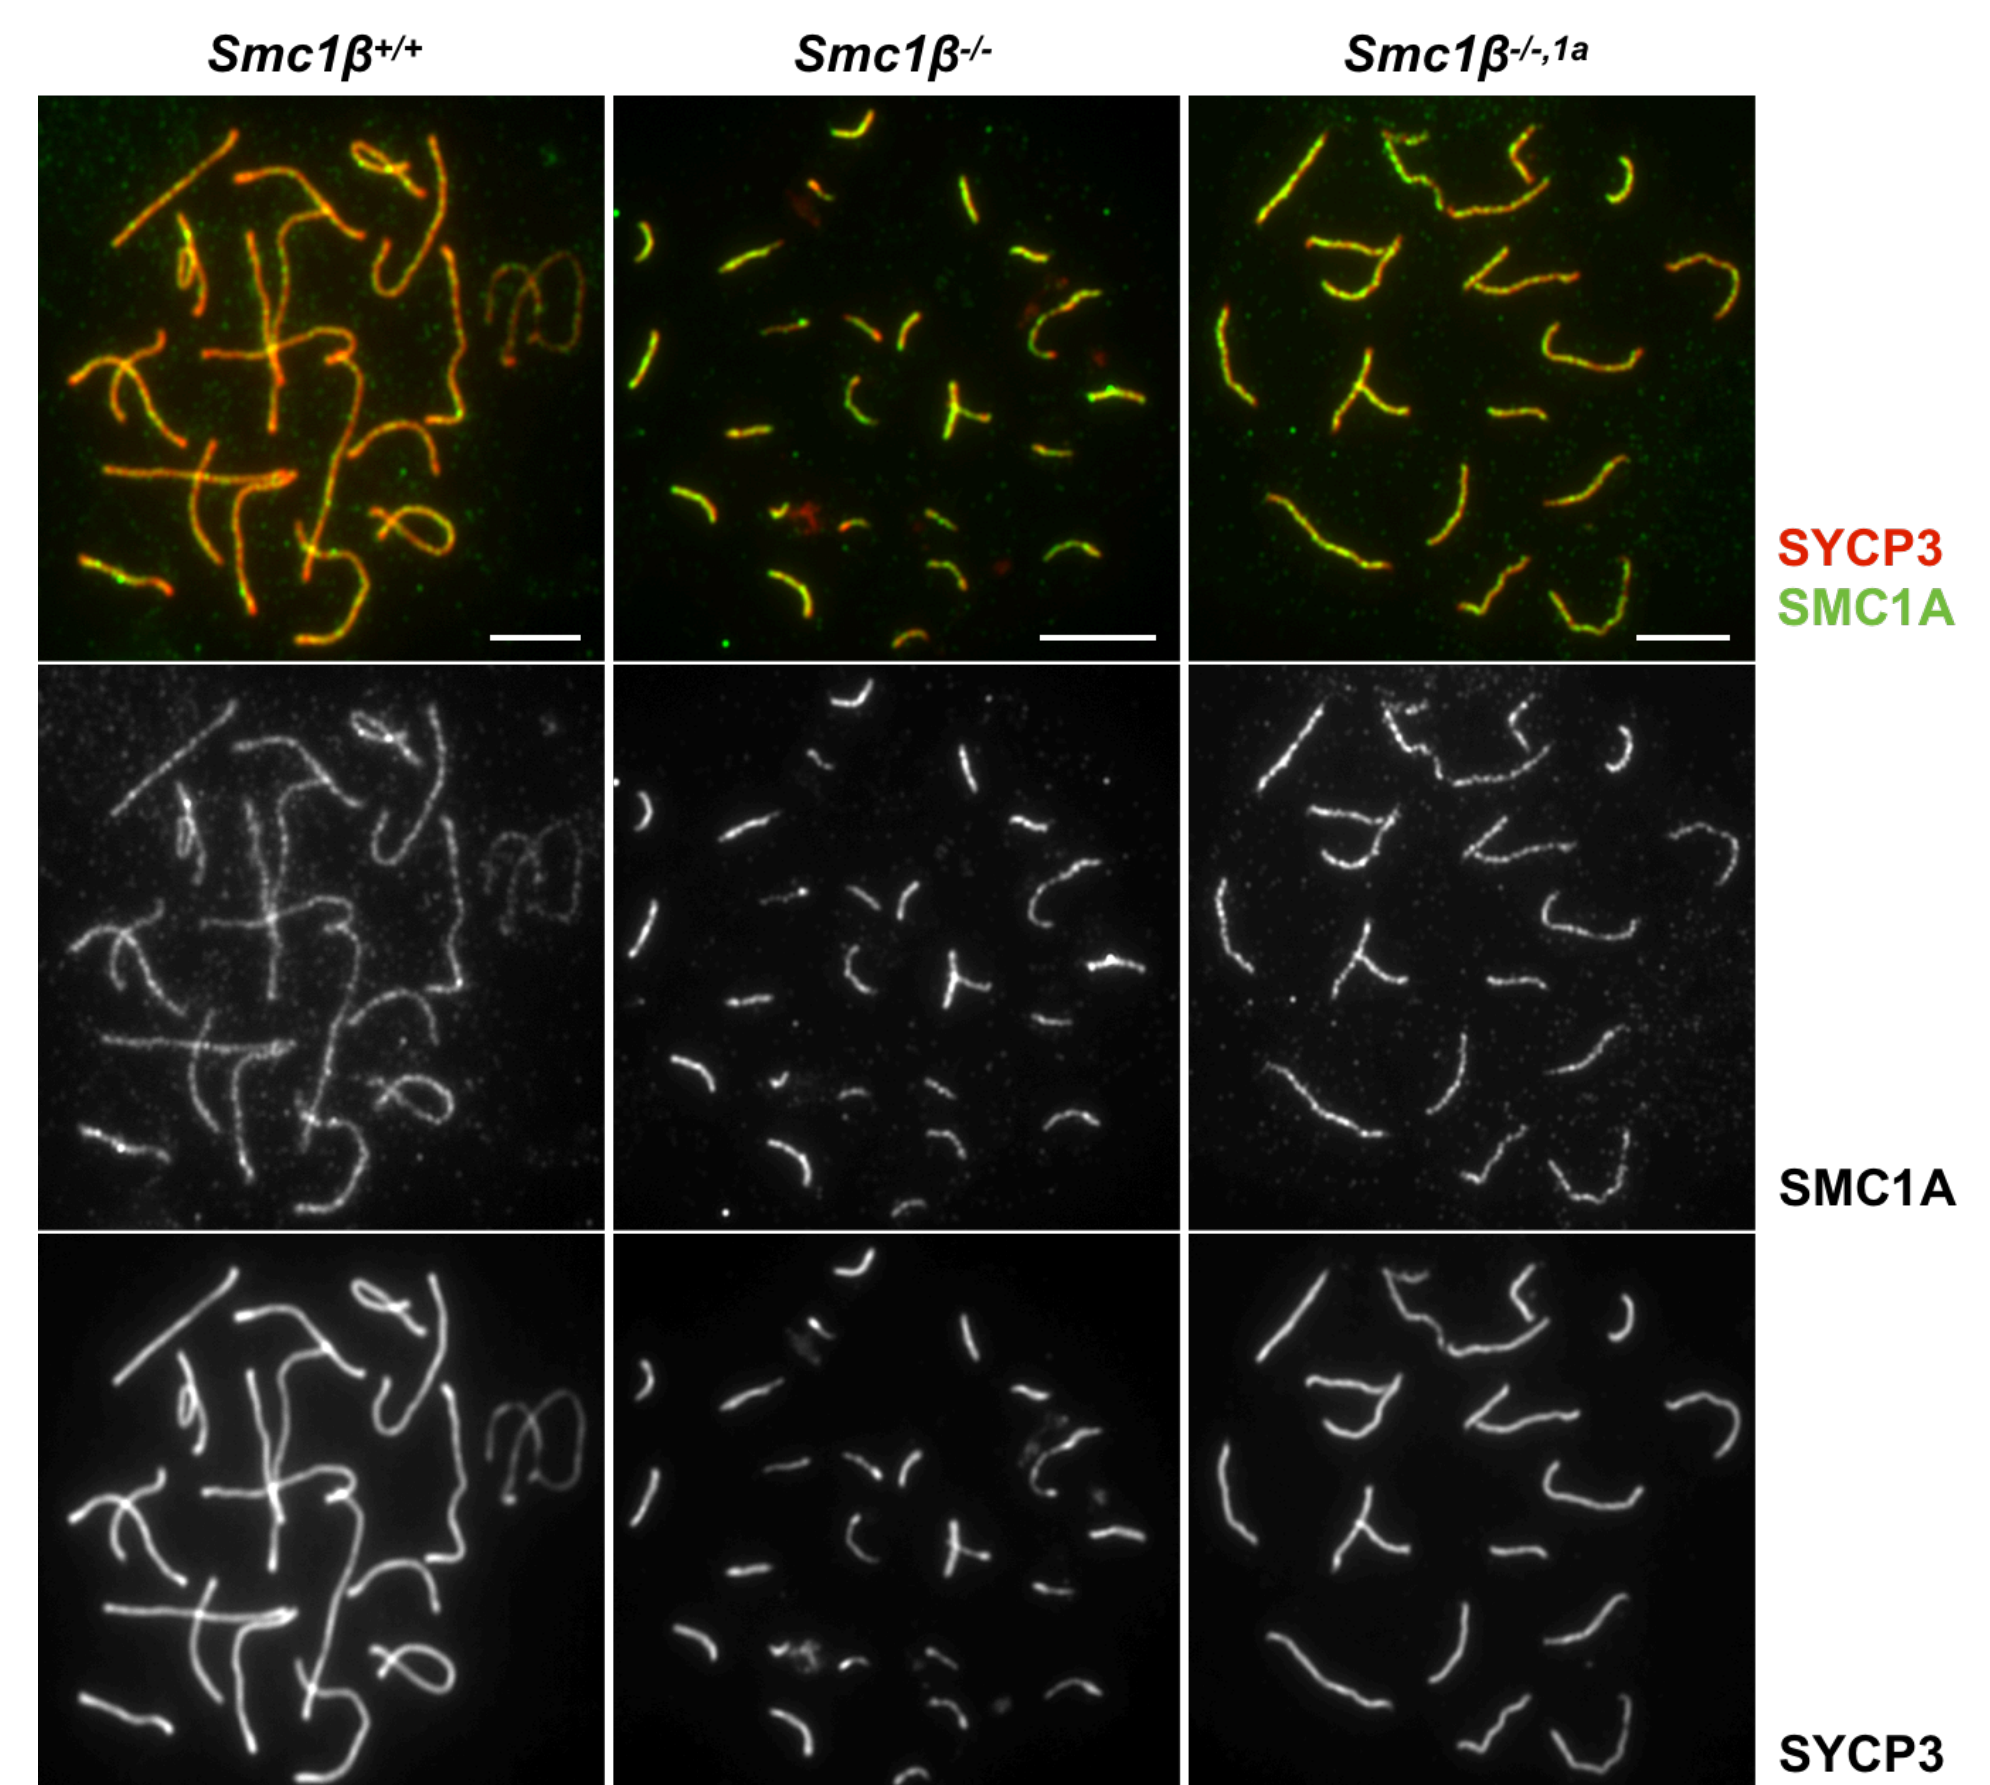

**Figure S2. Presence of cohesin proteins. Related to Figure 2.** Spermatocyte chromosome spreads of *Smc1β<sup>+/+</sup>*, *Smc1β<sup>-/-</sup>* and *Smc1β<sup>-/-,1a</sup>* mice were probed with anti-SYCP3 along with anti-SMC3, anti-STAG3, anti-SMC1α, anti-REC8 anti-RAD21L or anti-RAD21 (scale bar: 5 μm). All cohesins are labeled in green. Lower panels: Single channel images of spermatocyte chromosome spreads of *Smc1β<sup>+/+</sup>*, *Smc1β<sup>-/-</sup>* and *Smc1β<sup>-/-,1a</sup>* mice probed with anti-SYCP3 along with anti-SMC3 or anti-SMC1α; (scale bars: 5 μm).

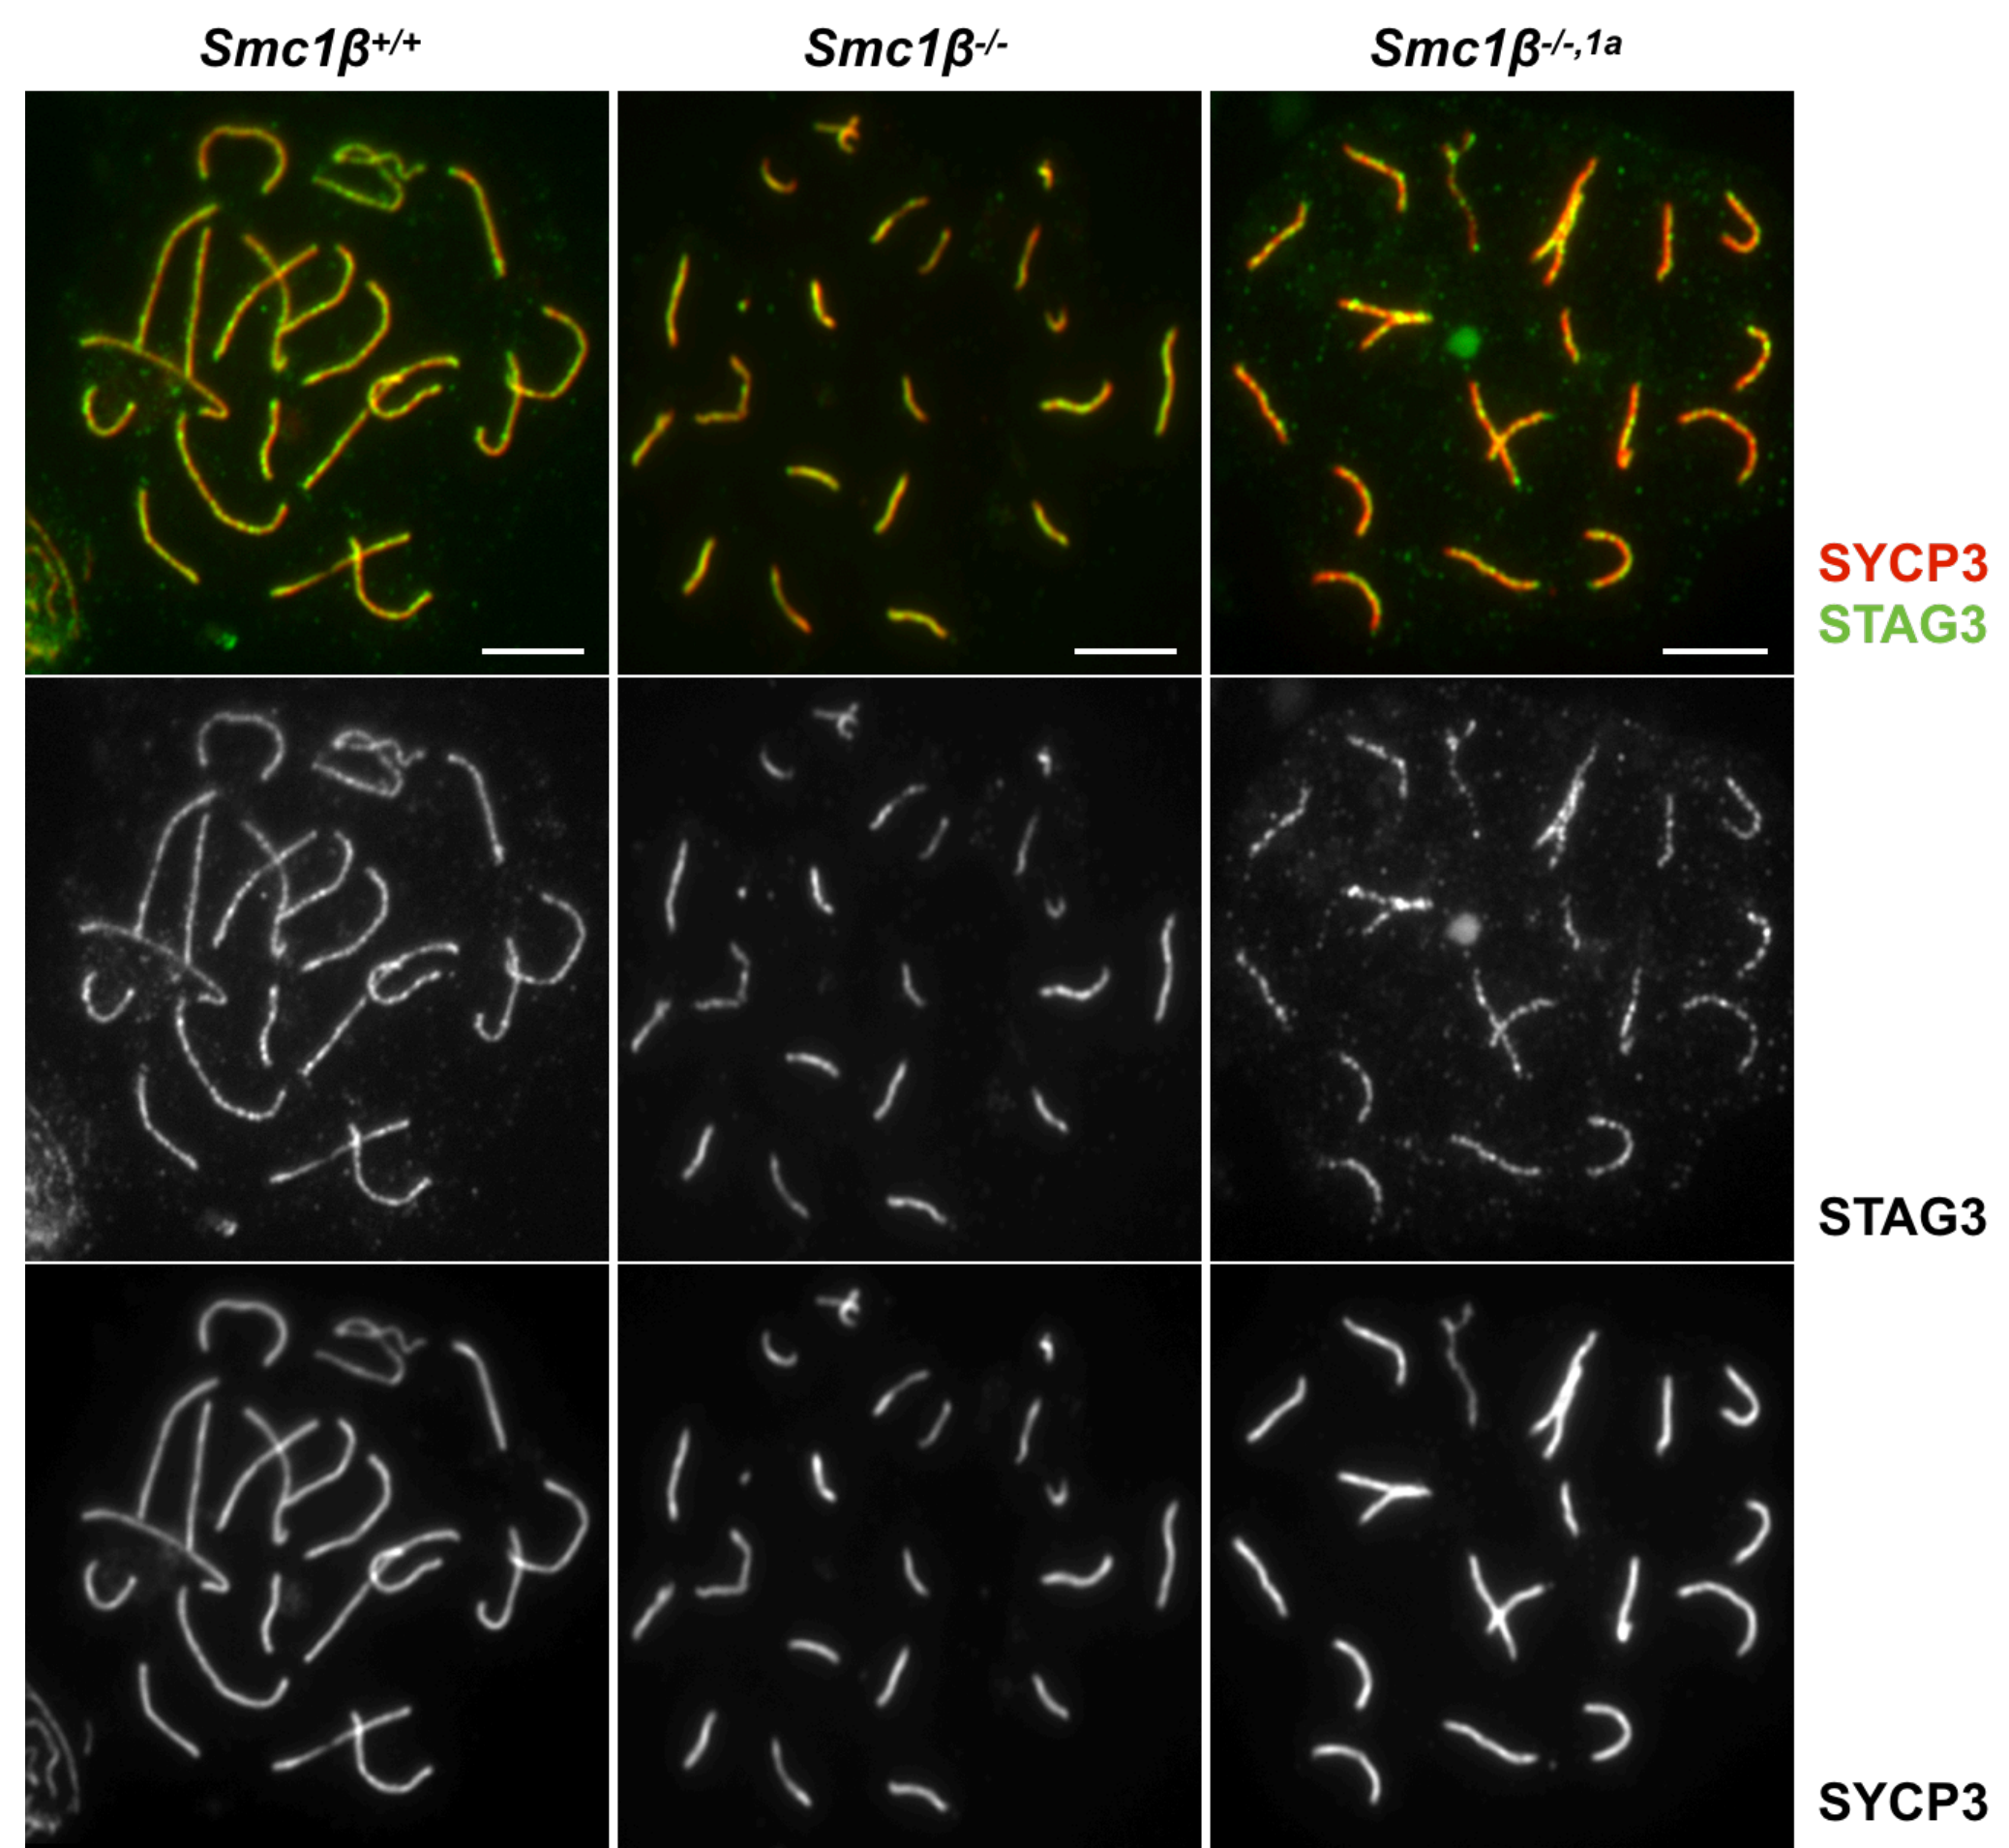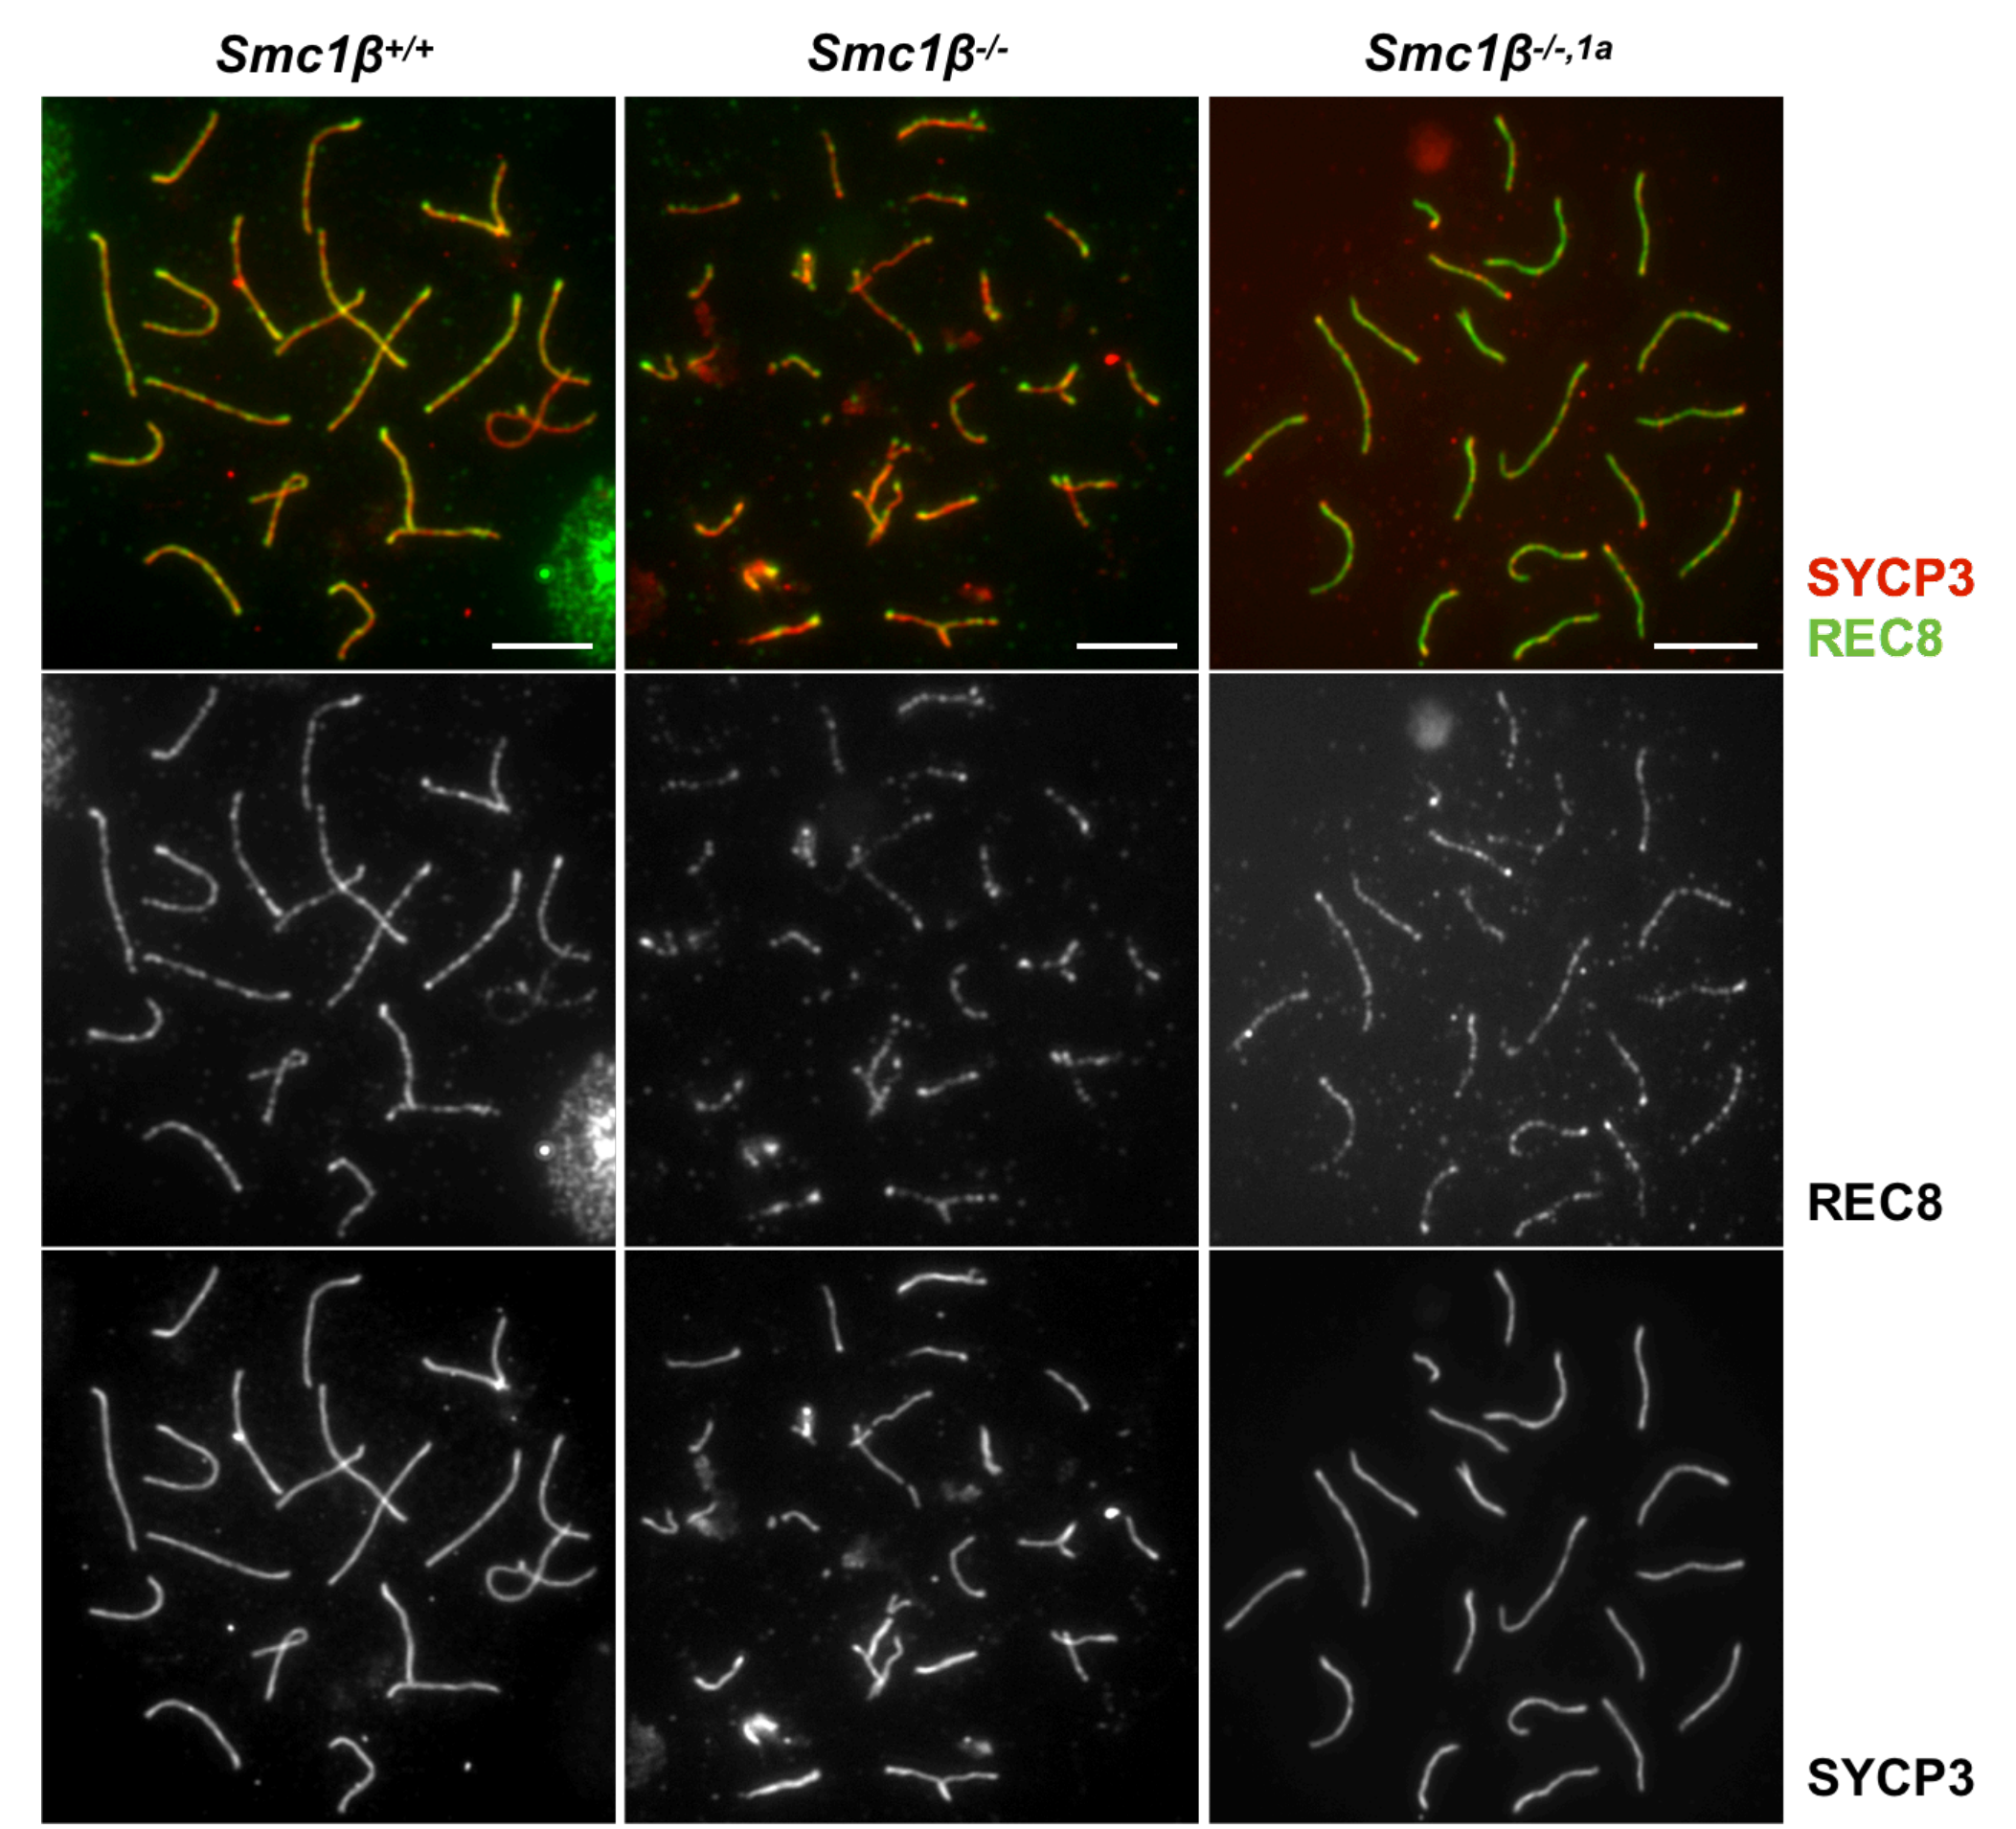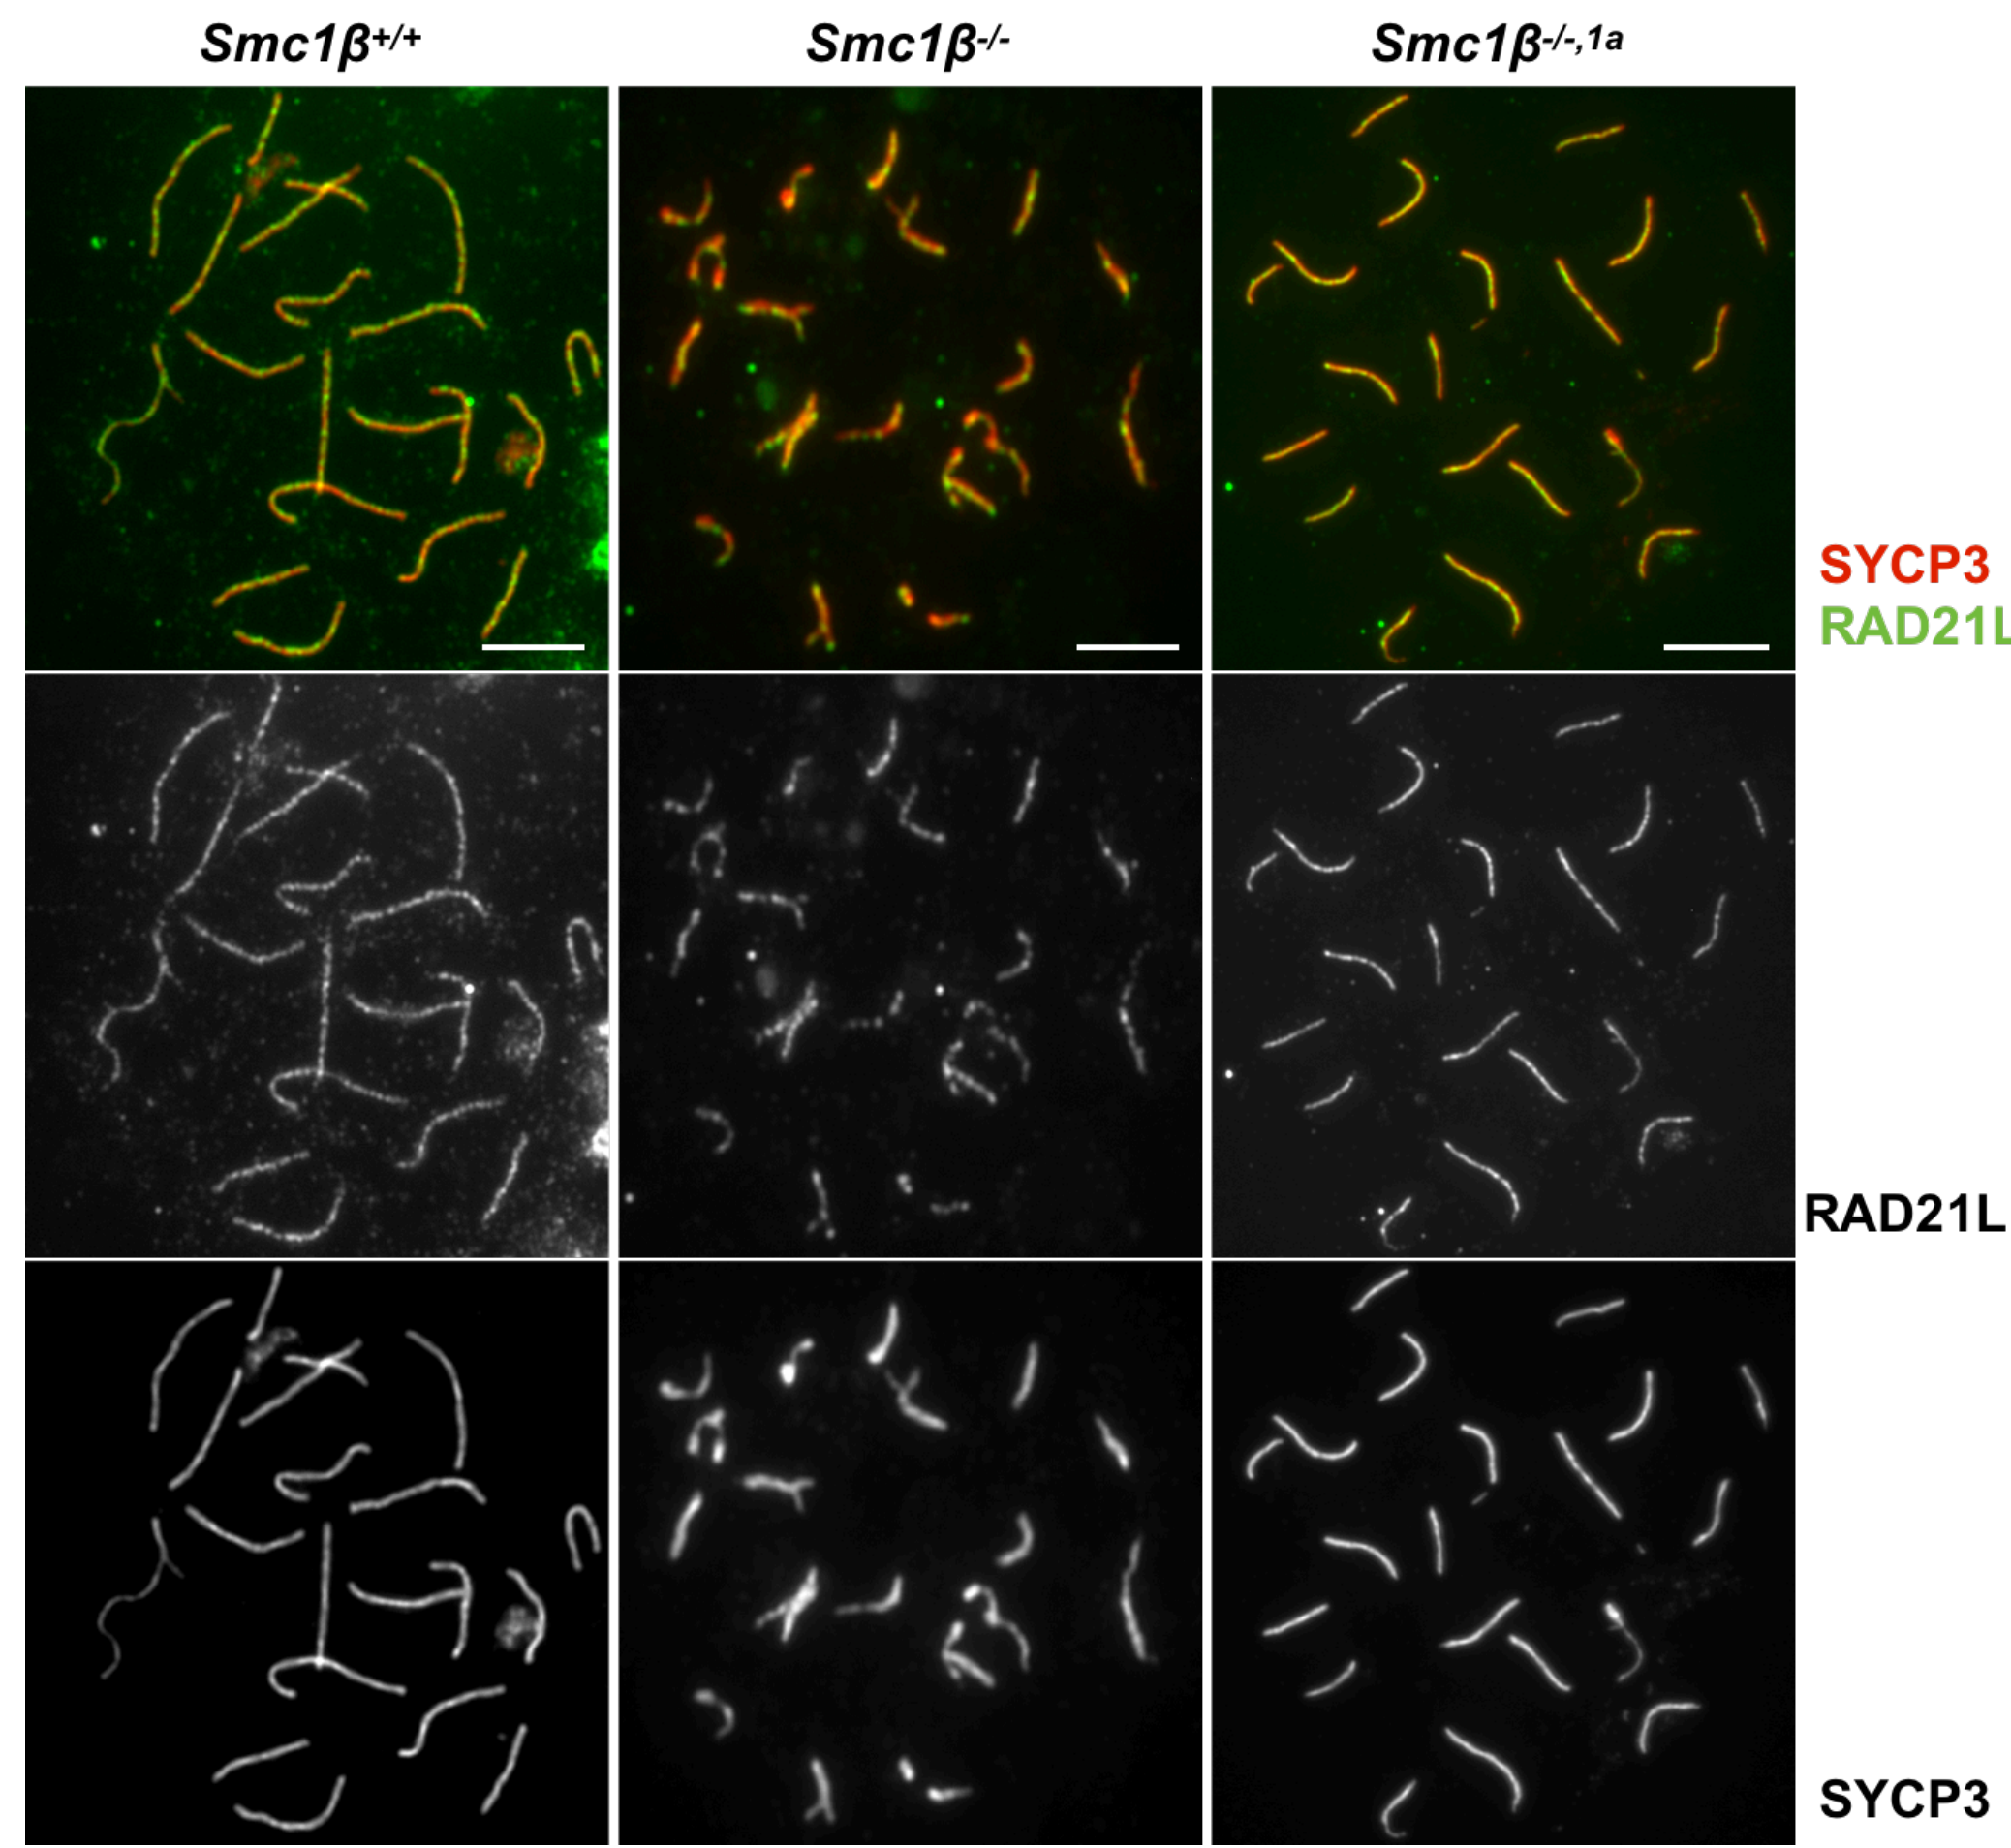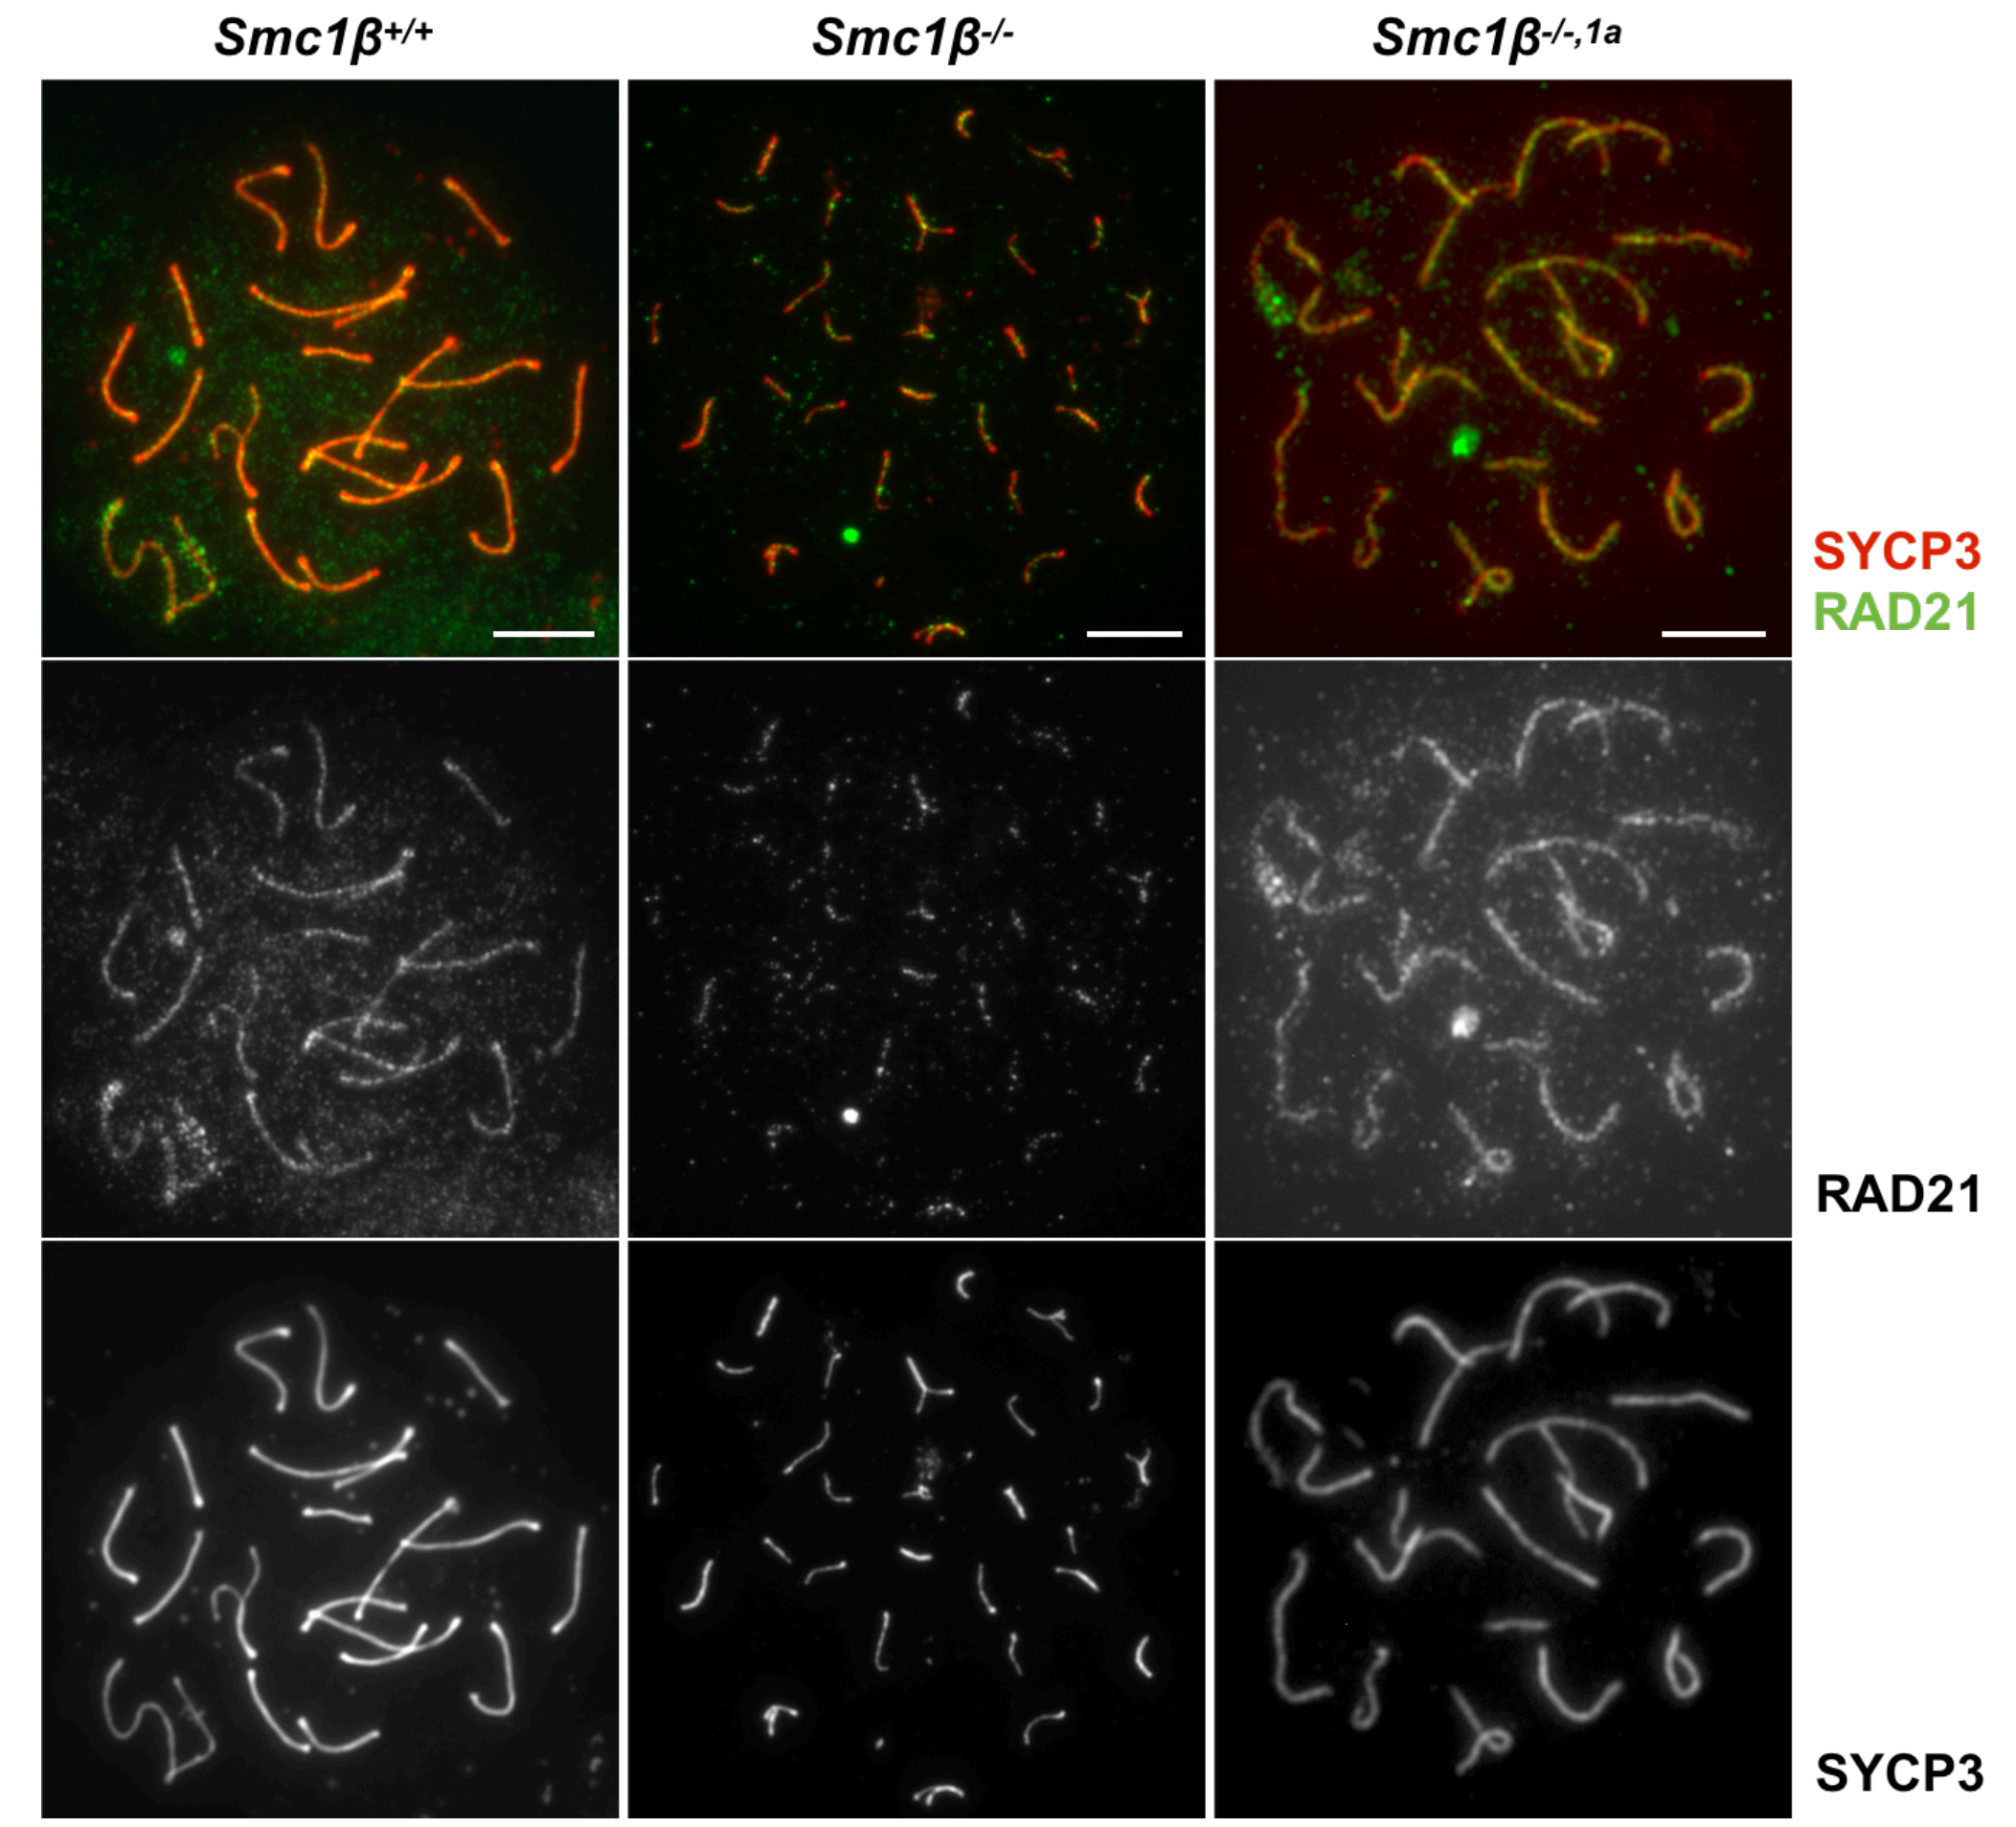

**Figure S3. Presence of cohesin proteins. Related to Figure 2.** Single channel images of spermatocyte chromosome spreads of *Smc1β<sup>+/+</sup>*, *Smc1β<sup>-/-</sup>* and *Smc1β<sup>-/-</sup>, 1a* mice probed with anti-SYCP3 along with anti-STAG3, anti-REC8, anti-RAD21L, or anti-RAD21; (scale bars: 5 μm).

**A**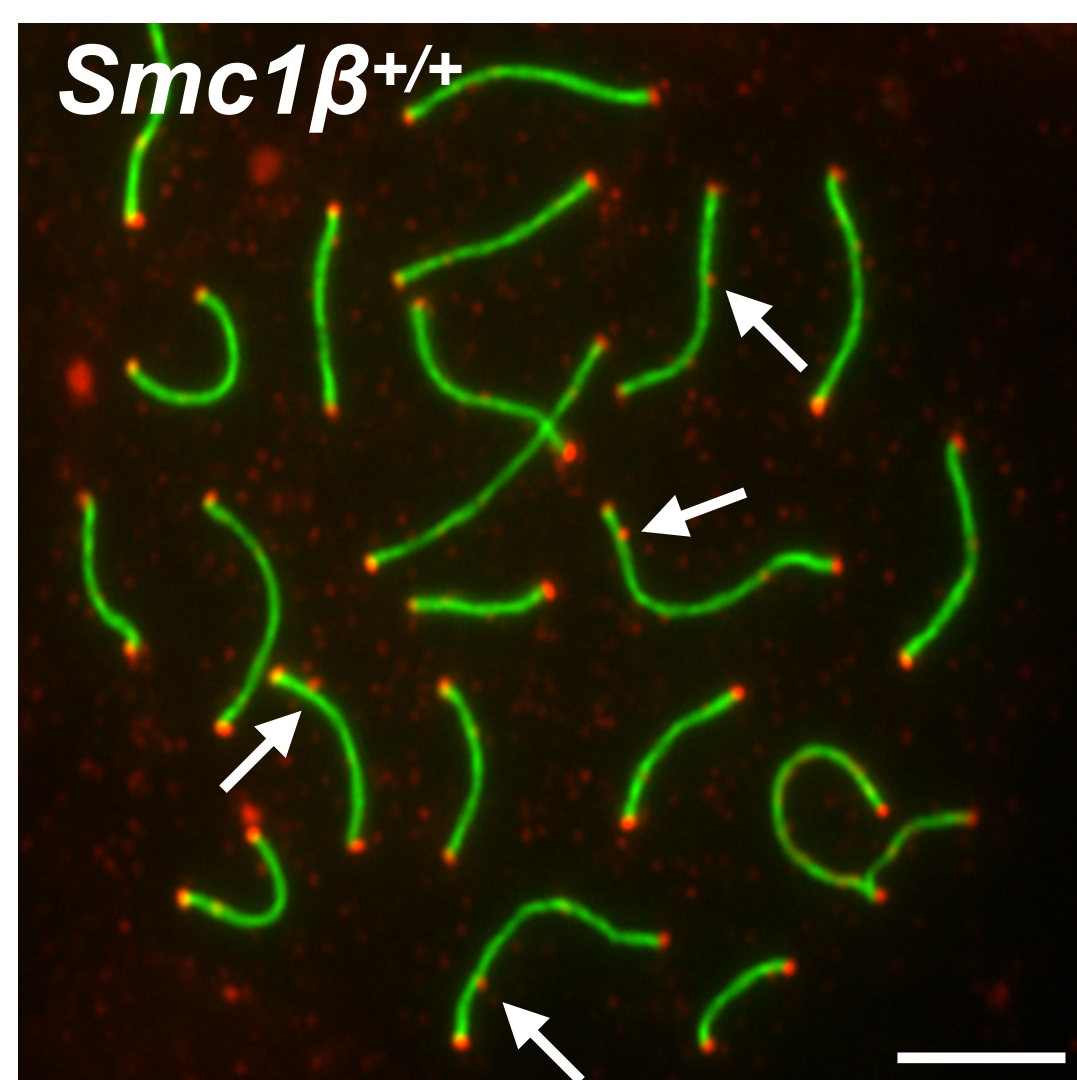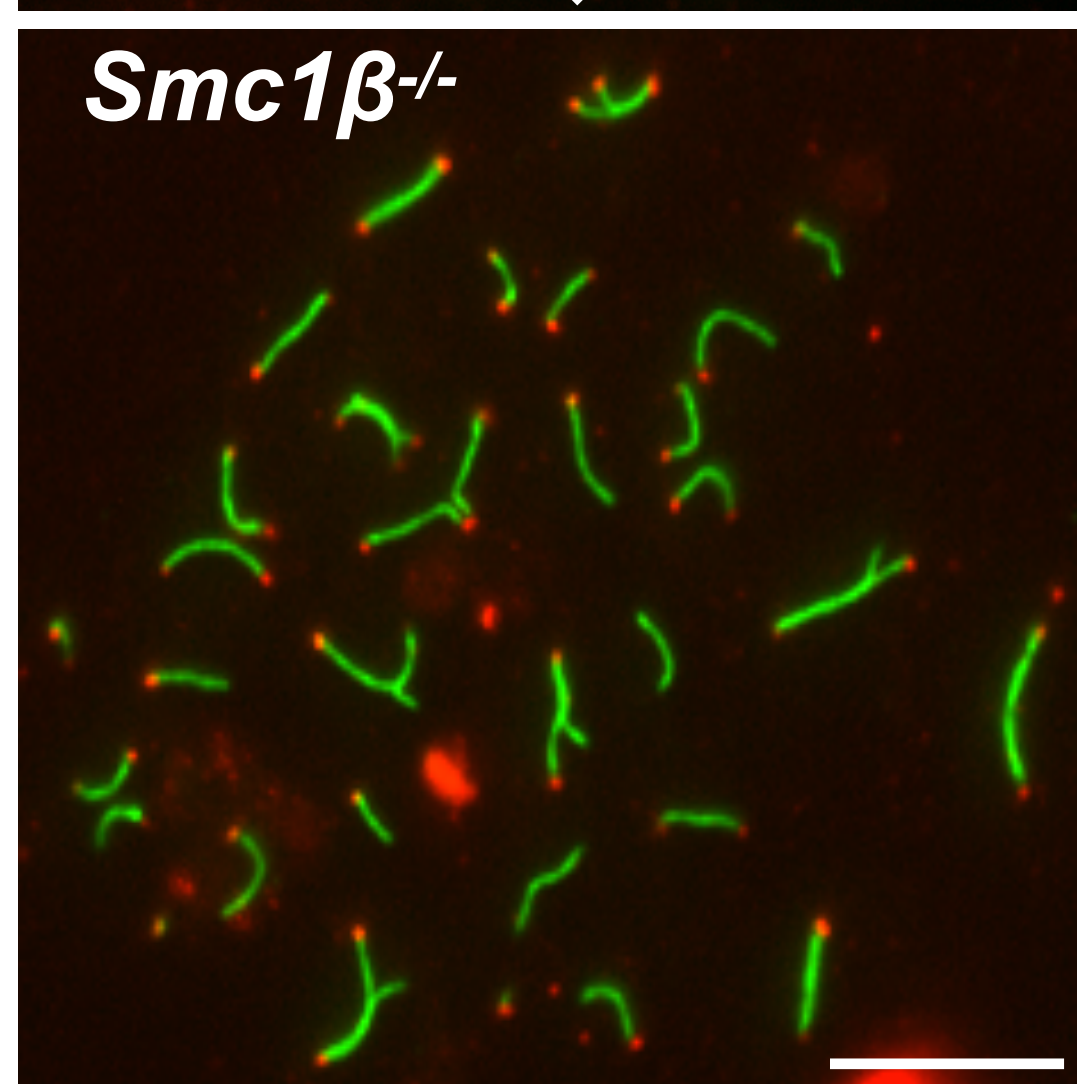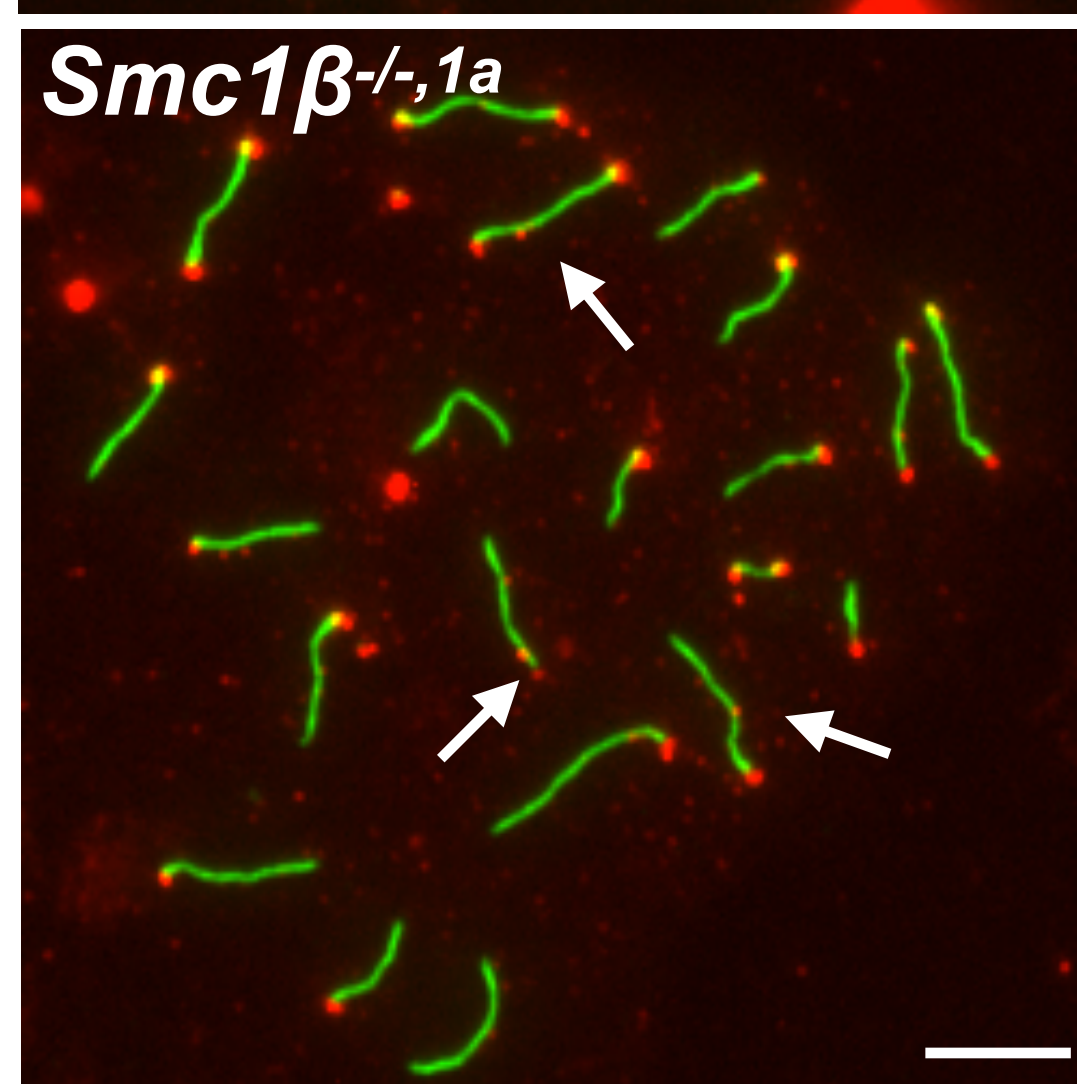

SYCP3  
CDK2

**B**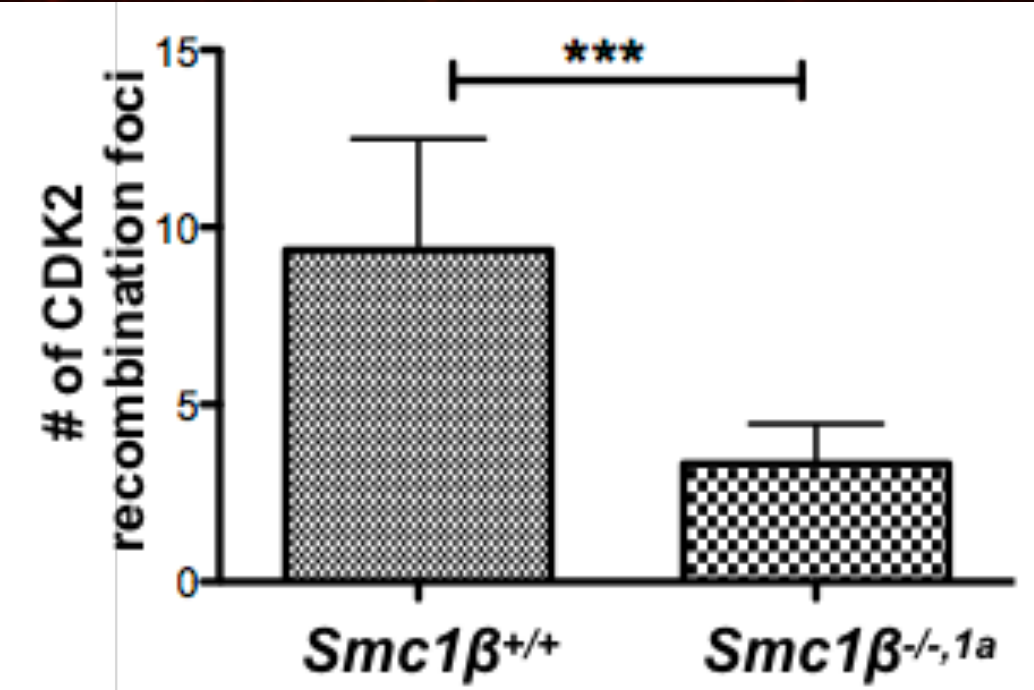**C**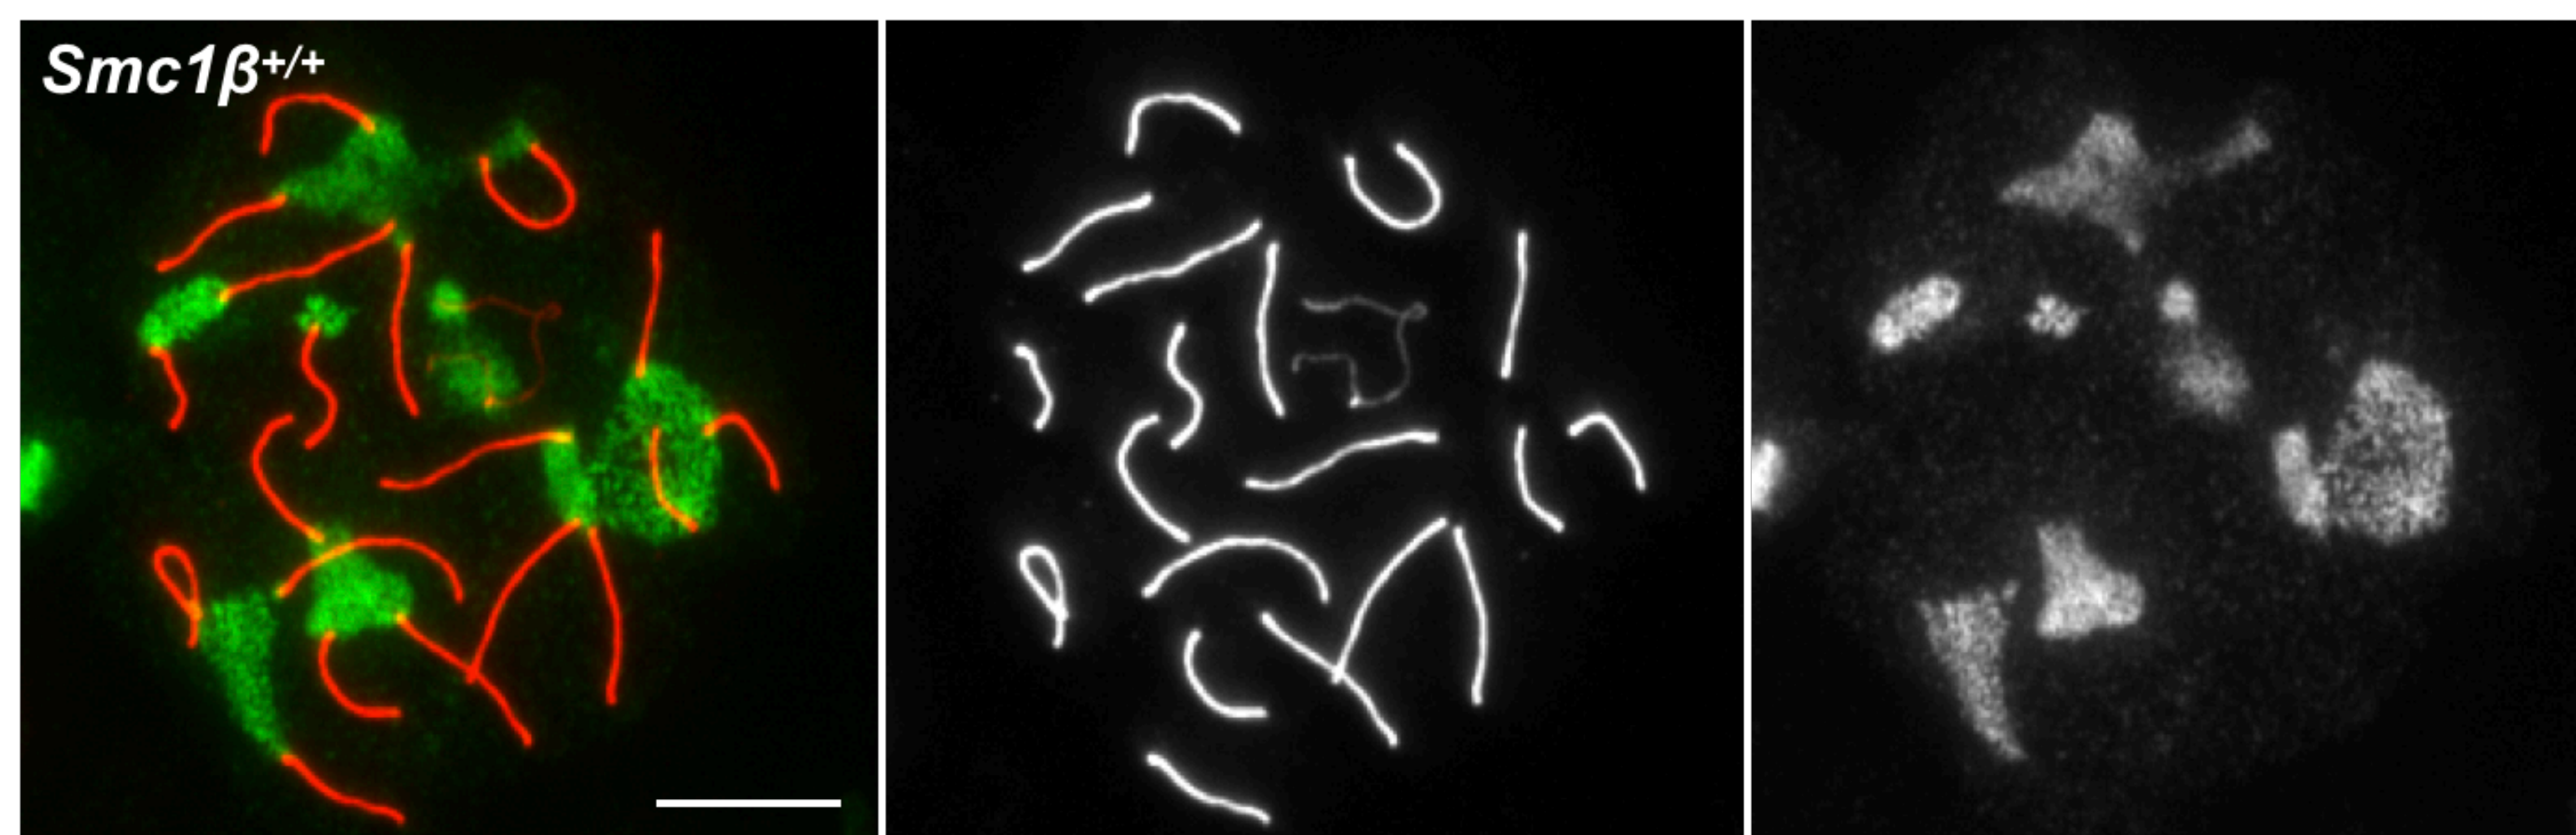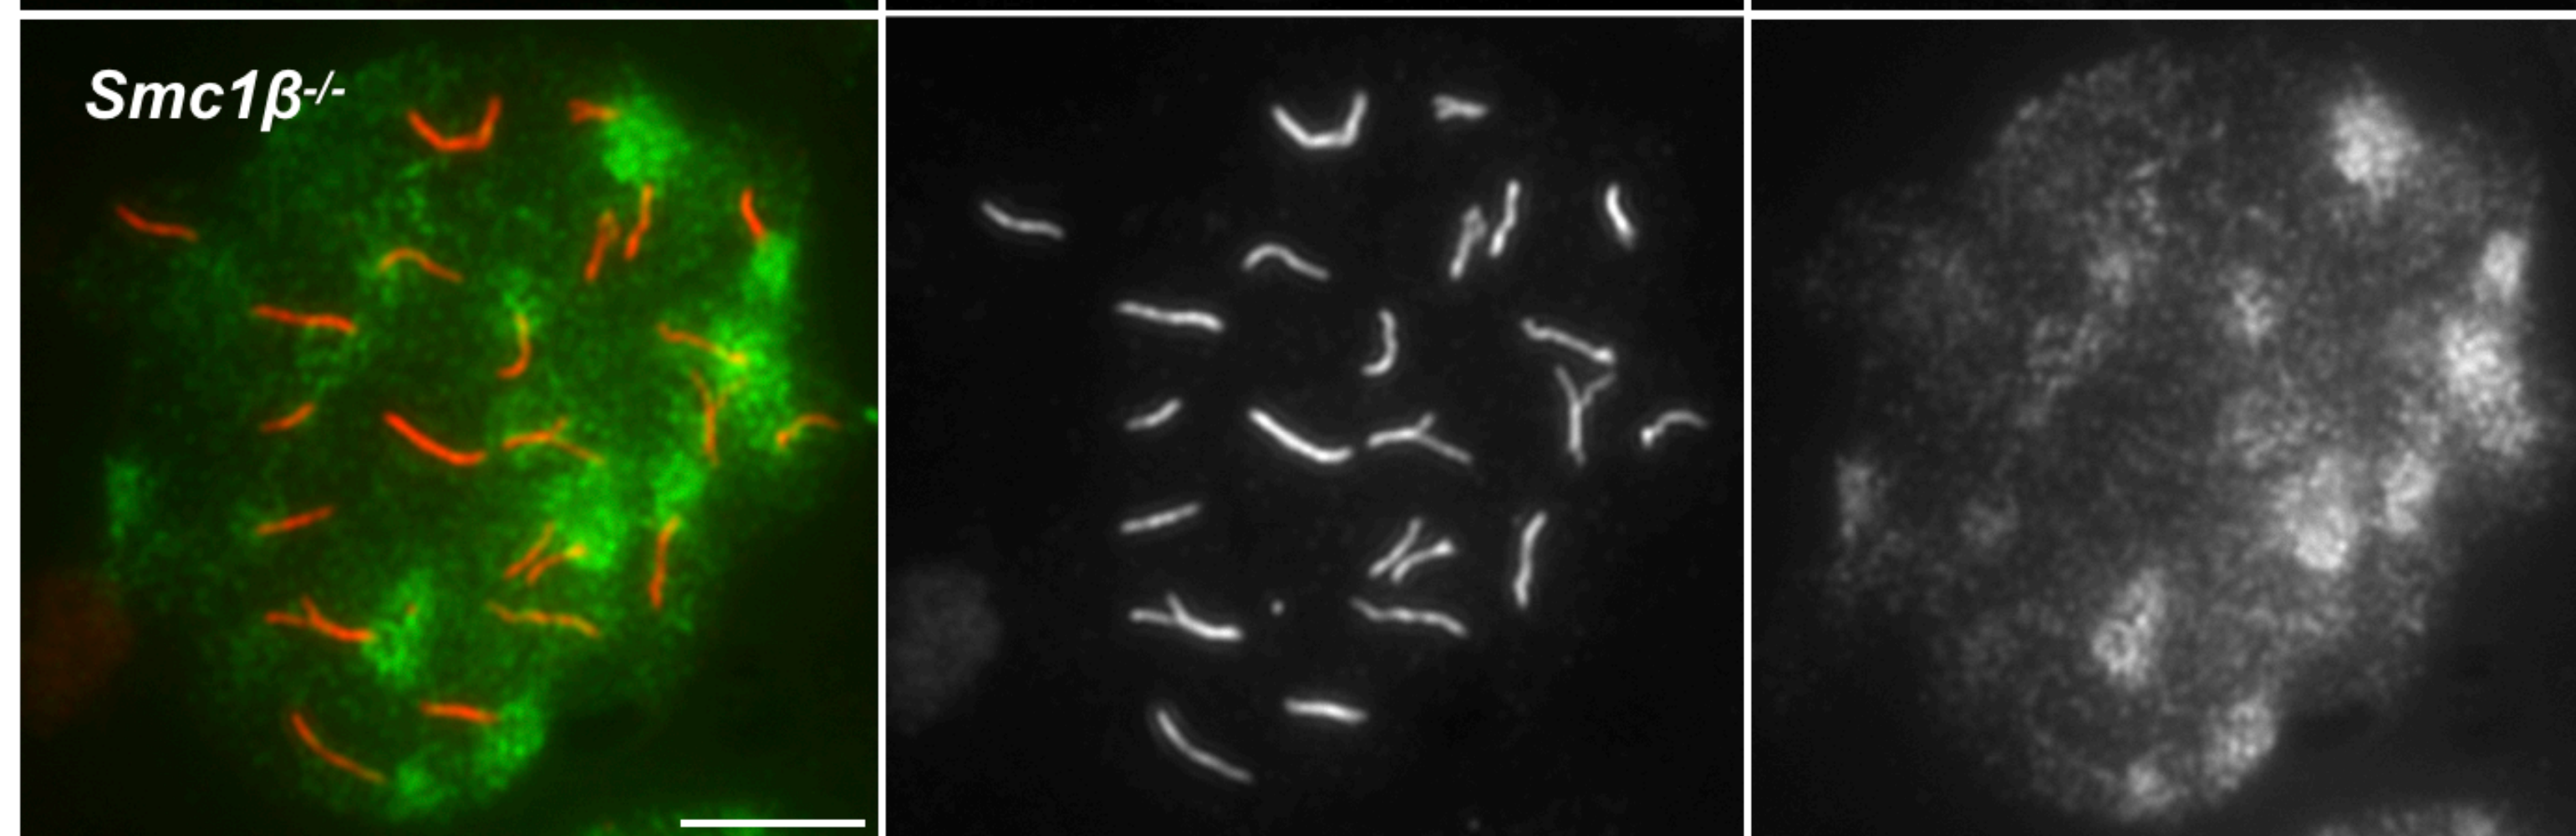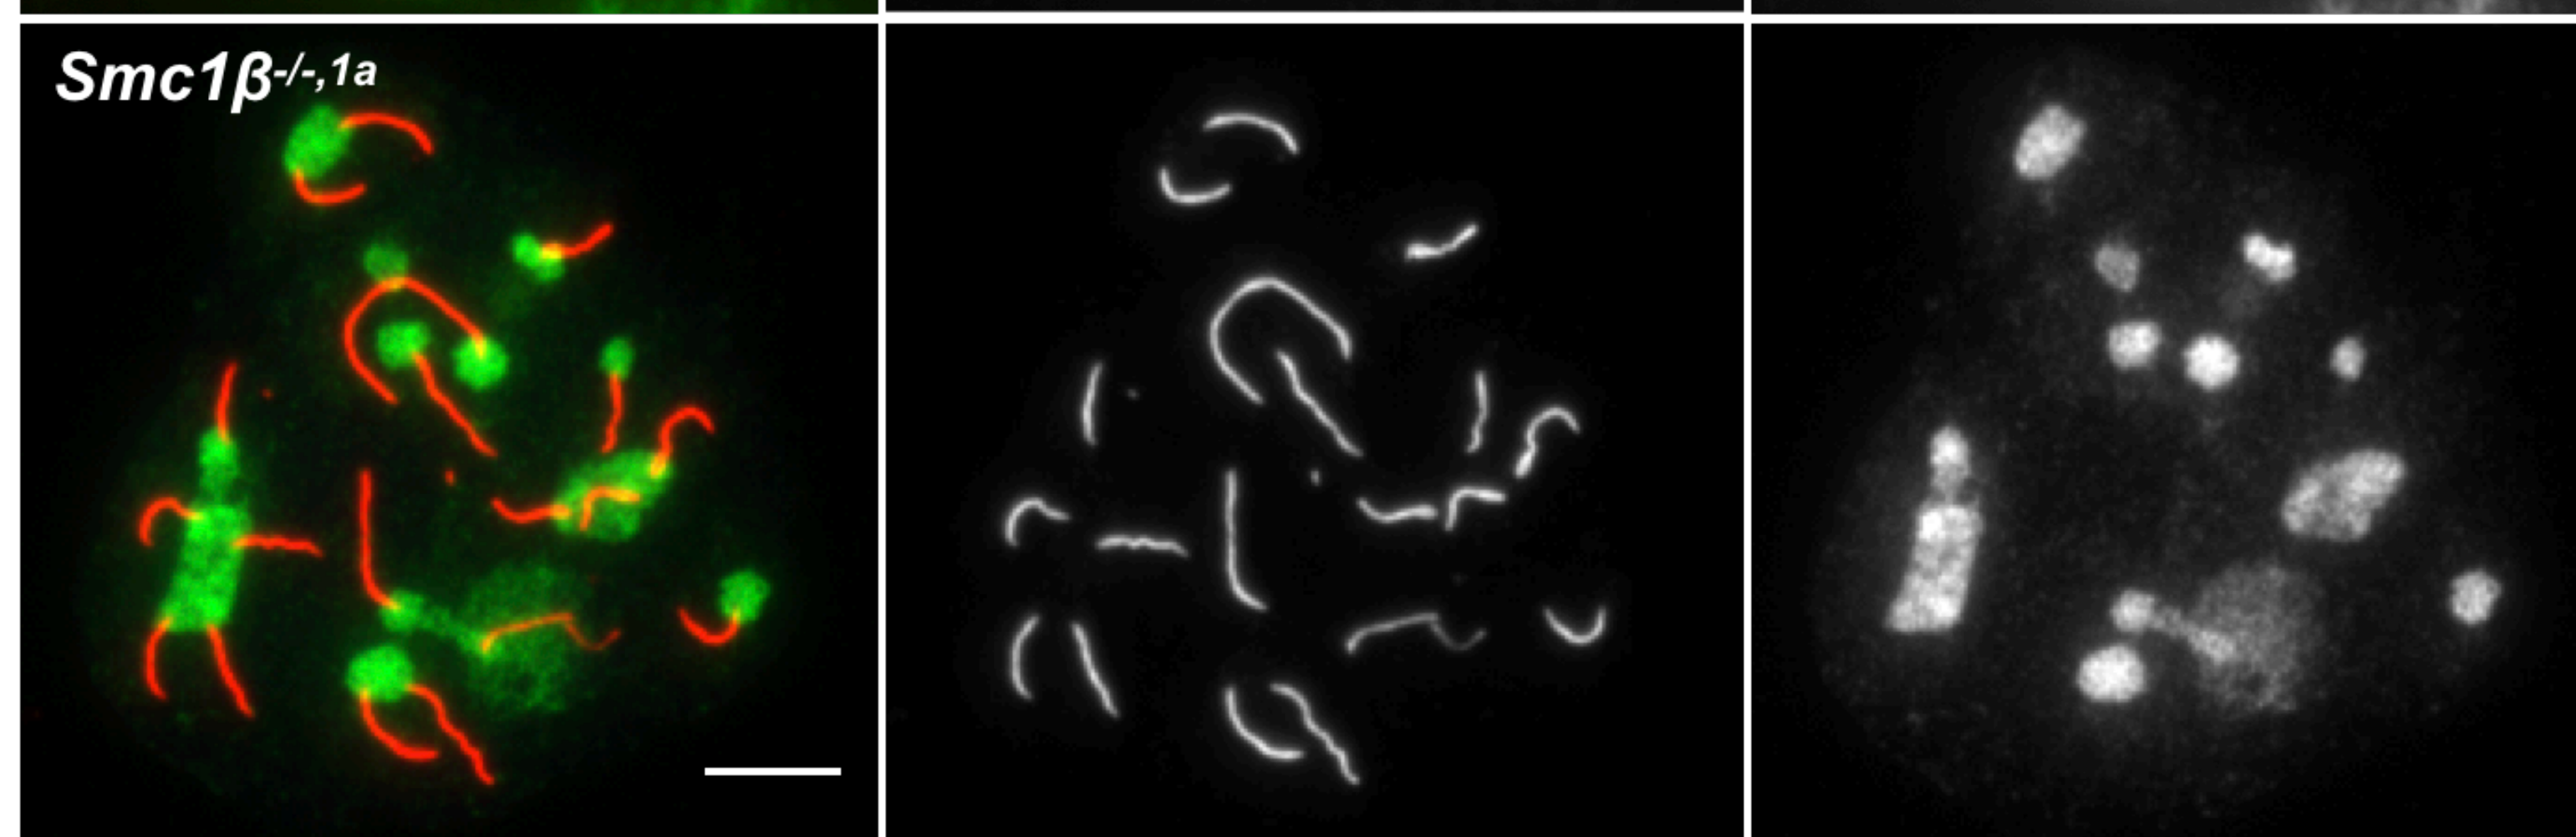

H3K9me3 SYCP3

SYCP3

H3K9me3



**Figure S4. Analysis of CDK2 foci. Related to Figure 3.** (A) Spermatocyte chromosome spreads of *Smc1β<sup>+/+</sup>*, *Smc1β<sup>-/-</sup>* and *Smc1β<sup>-/-,1a</sup>* mice were stained with anti-CDK2 (red) and with anti-anti-SYCP3 (green) for AEs/LEs, (scale bar: 5 μm) (B) Graphical representation of CDK2 recombination foci of spermatocyte spreads as measured using the image J software; (*Smc1β<sup>+/+</sup>*: N=50, 9.36 (average foci number, +/- 3.128 SD); *Smc1β<sup>-/-,1a</sup>*: N=36, 3.33 (+/- 1.12); p < 0.05). (C) H3K9me3 localization. Spermatocyte chromosome spreads of *Smc1β<sup>+/+</sup>* and *Smc1β<sup>-/-,1a</sup>* mice were stained with anti-H3K9me3 (green) for heterochromatin and with anti-anti-SYCP3 (red) for AEs/LEs. (scale bar: 5 μm).

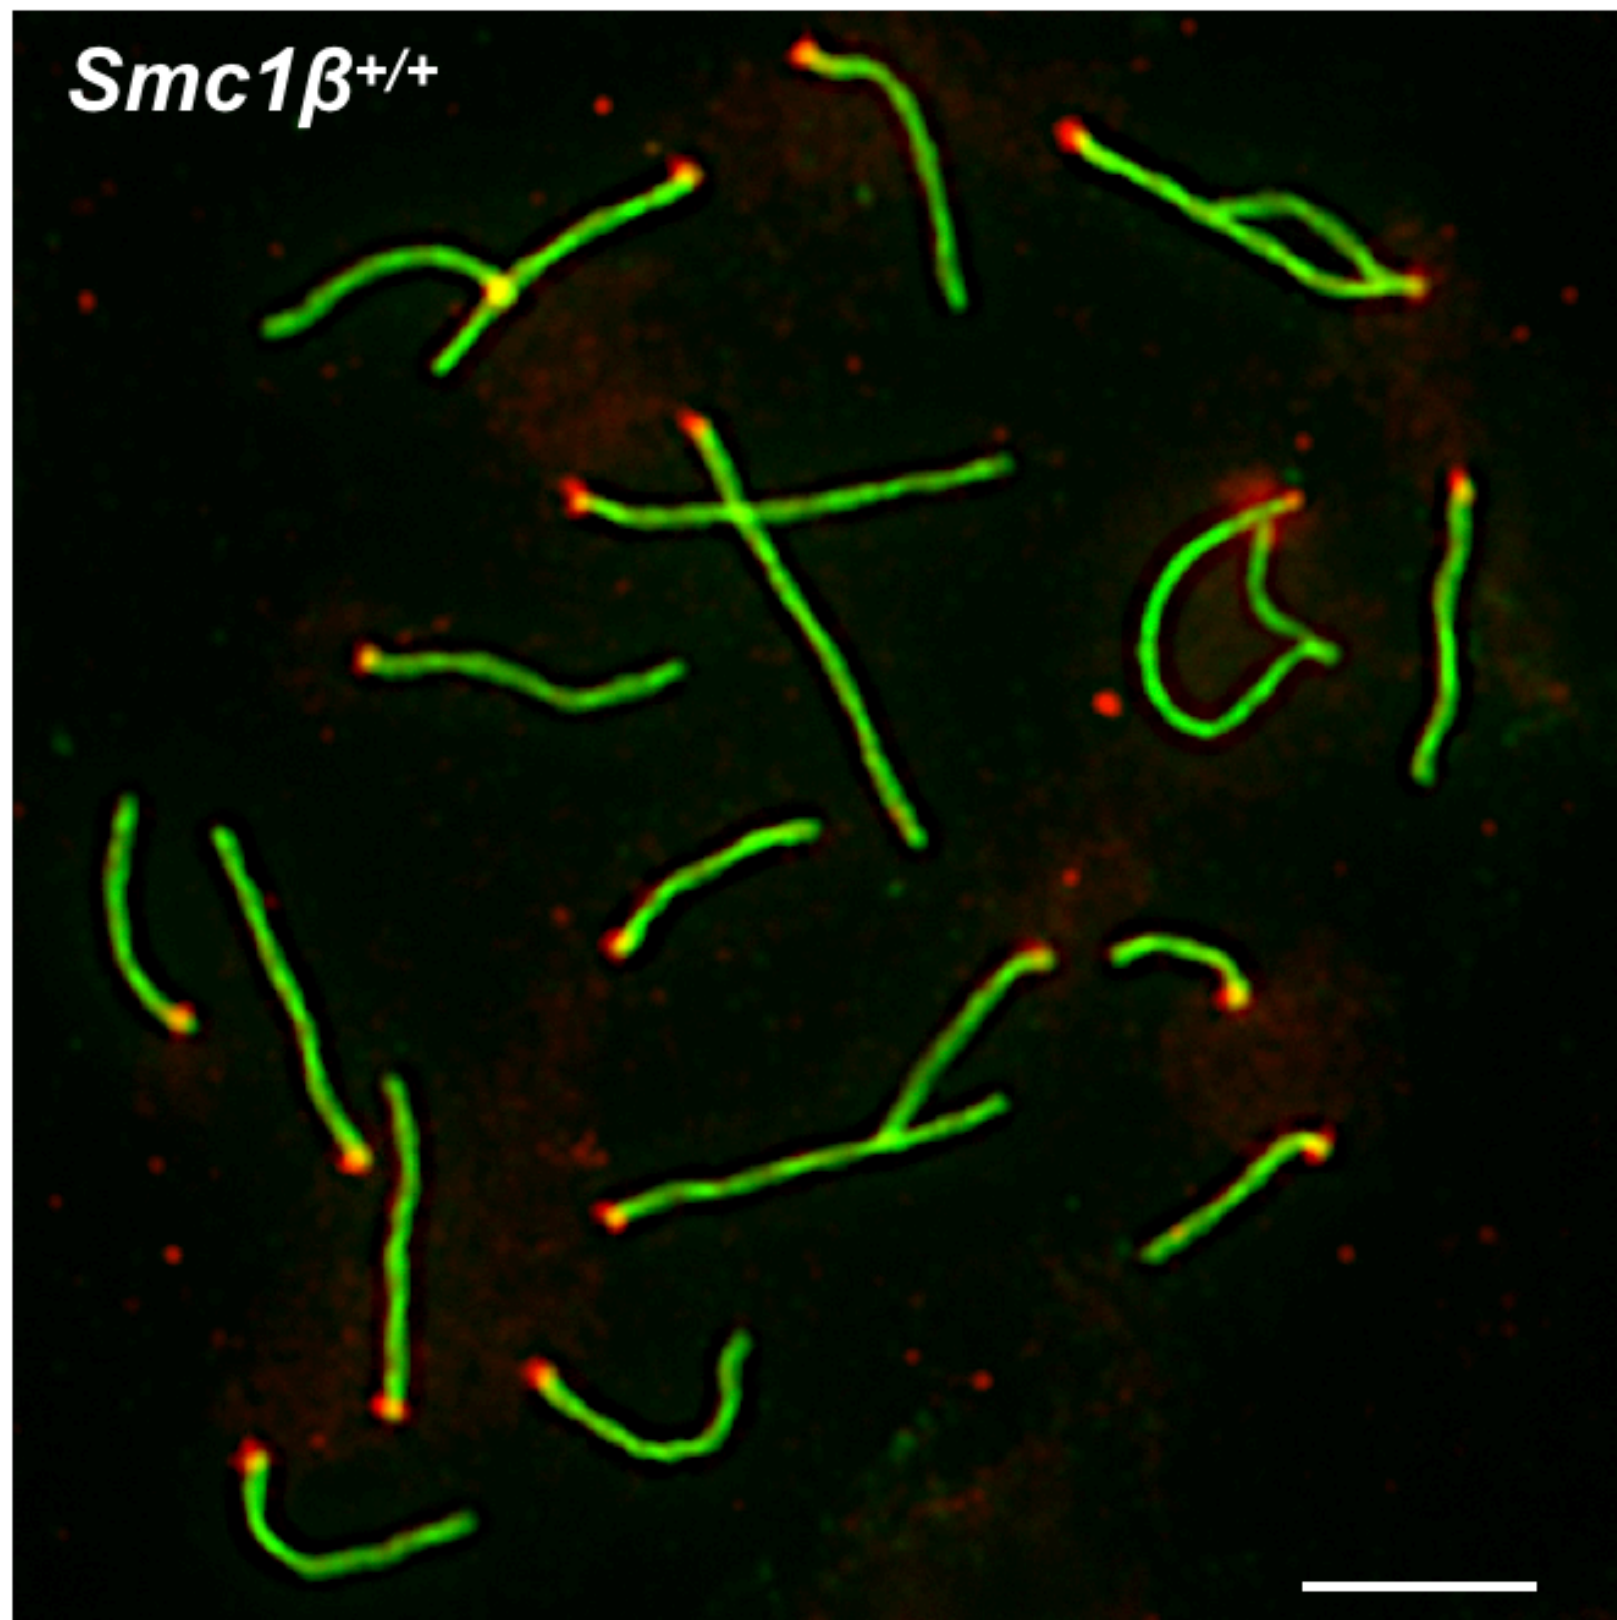

ACA SYCP3

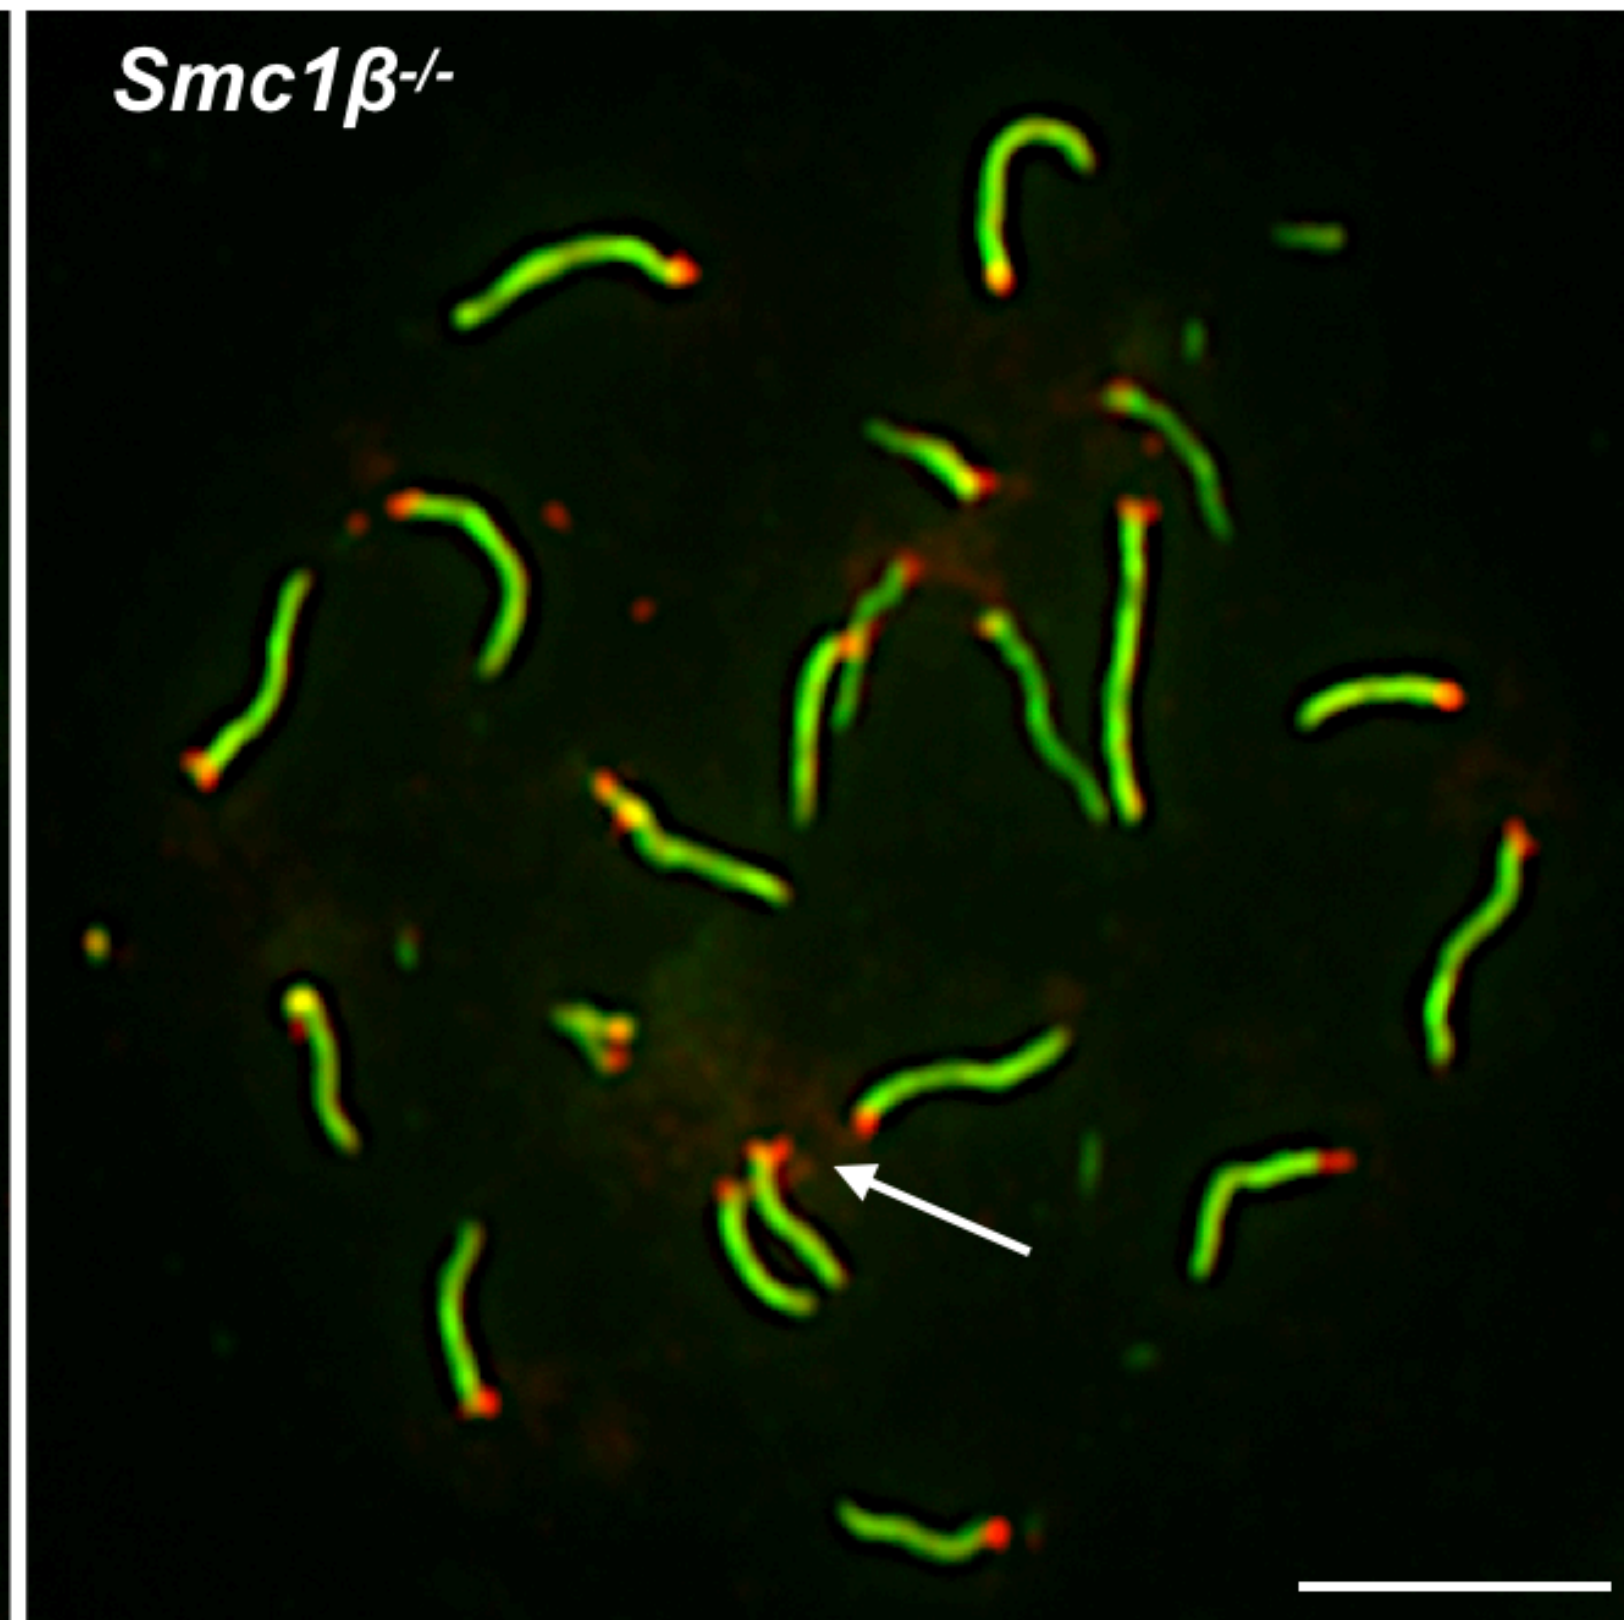

ACA SYCP3

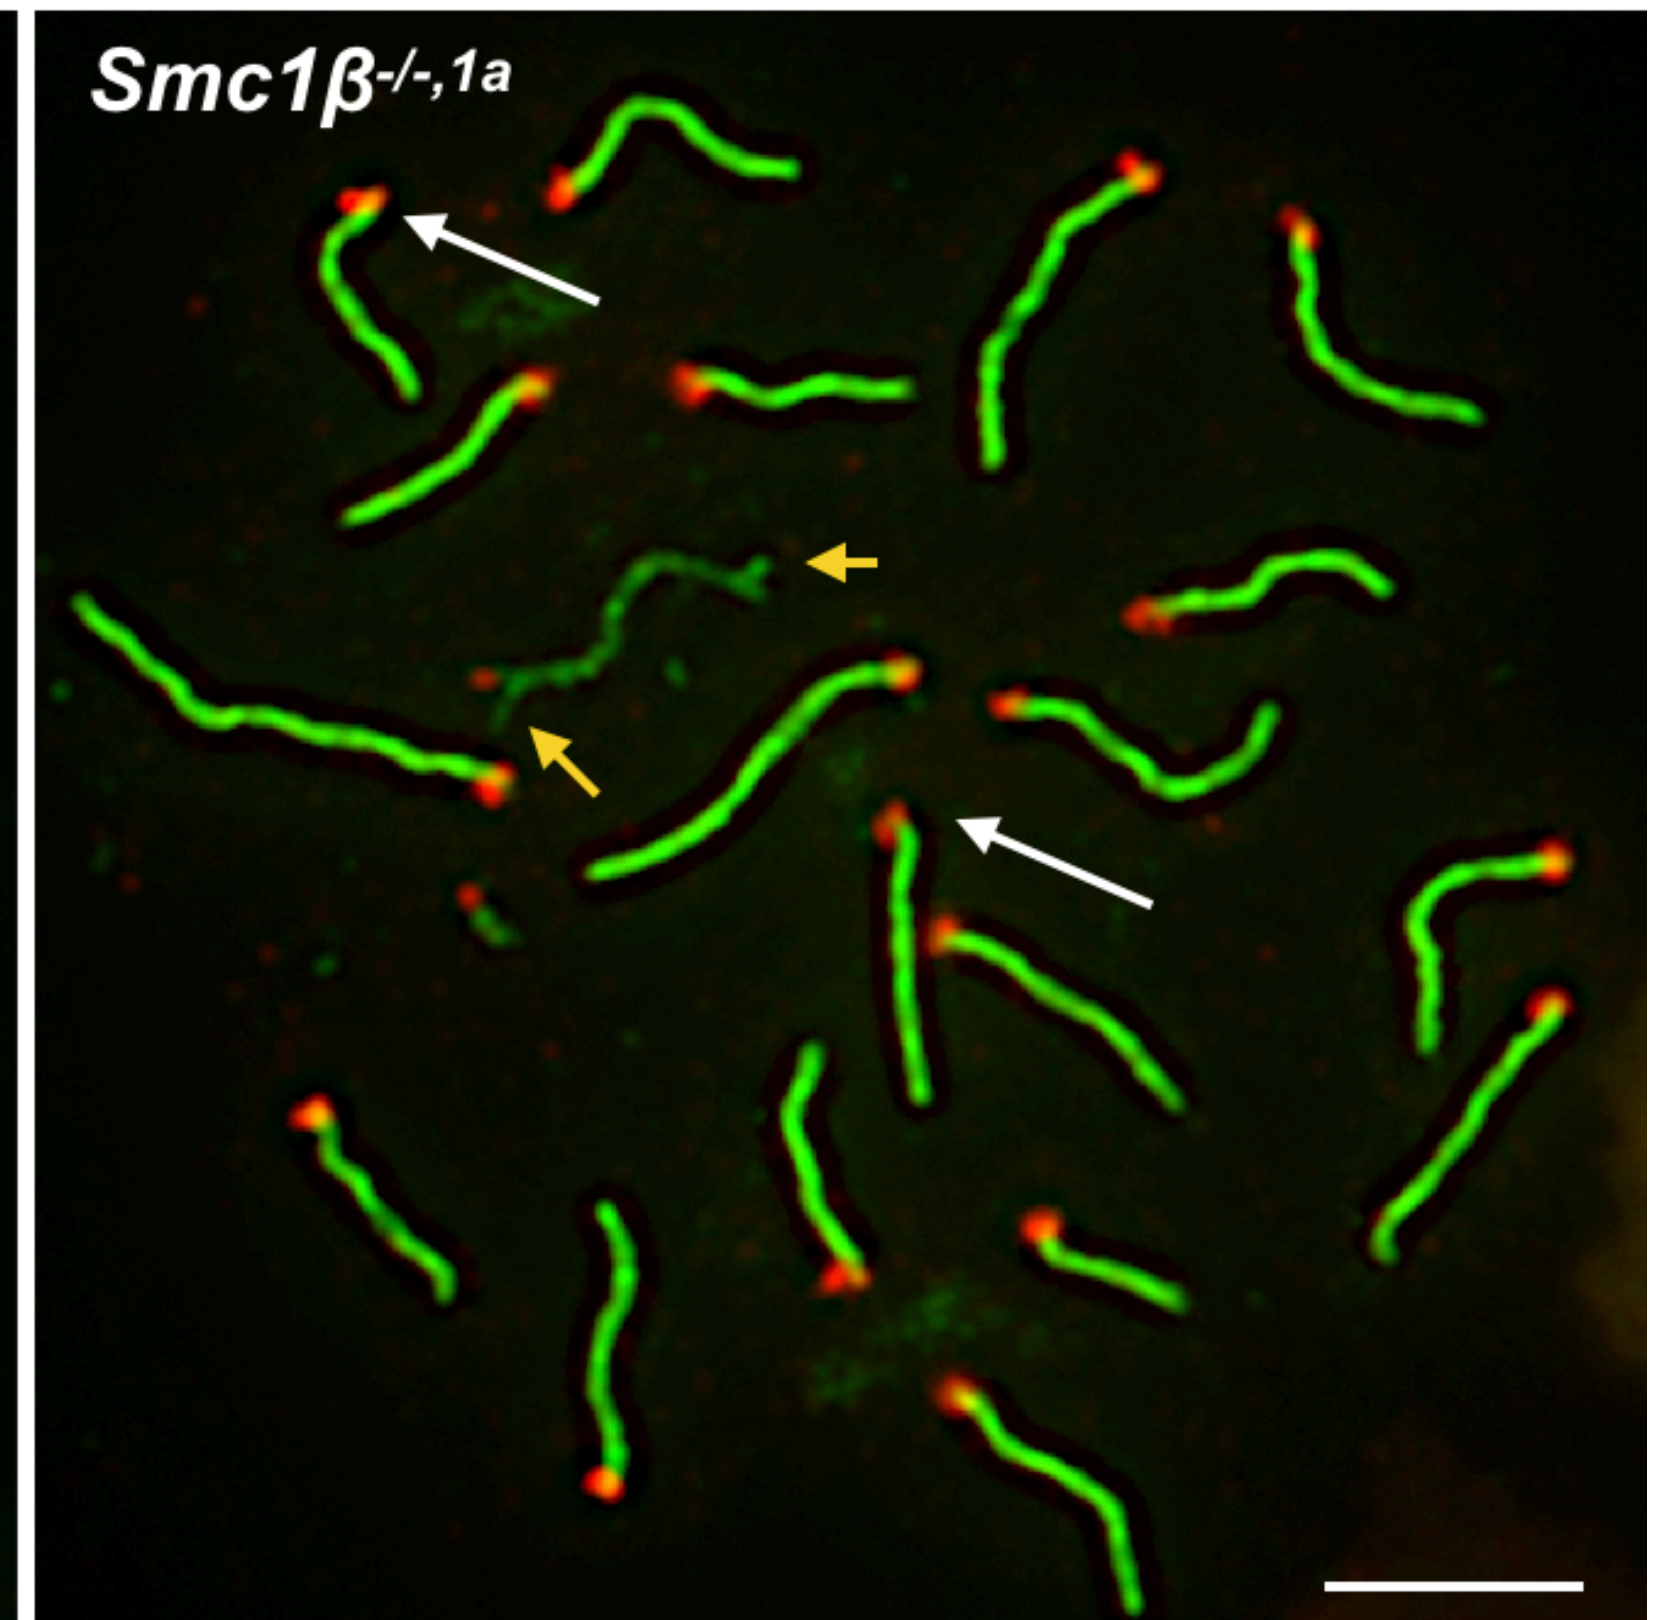

ACA SYCP3

**Figure S5. Centromere/pericentromere staining. Related to figure 5.** Spermatocyte chromosome spreads of *Smc1* $\beta^{+/+}$ , *Smc1* $\beta^{-/-}$  and *Smc1* $\beta^{-/-,1a}$  mice, stained with anti-SYCP3 (green) for AEs/LEs and anti-ACA (red); white arrows indicate abnormal centromere structures, yellow arrows show examples of loss of centromeric or telomeric cohesion seen at the X chromosome; (scale bar: 5  $\mu$ m).

**A** Average Telomere Aberrations/Cell

| Genotype                     | End-end Associations | Stretches | Solitary Telo Signals | Telo-less Ends | Overall | # of Telomeres Analyzed |
|------------------------------|----------------------|-----------|-----------------------|----------------|---------|-------------------------|
| <i>Smc1β<sup>-/-</sup></i>   | 0.06                 | 1.92      | 5.60                  | 5.92           | 13.69   | 533                     |
| <i>Smc1β<sup>-/-1a</sup></i> | 0.50                 | 2.33      | 3.91                  | 3.83           | 10.58   | 492                     |
| p-value                      | 0.25                 | 0.51      | 0.02                  | 0.31           | 0.05    |                         |

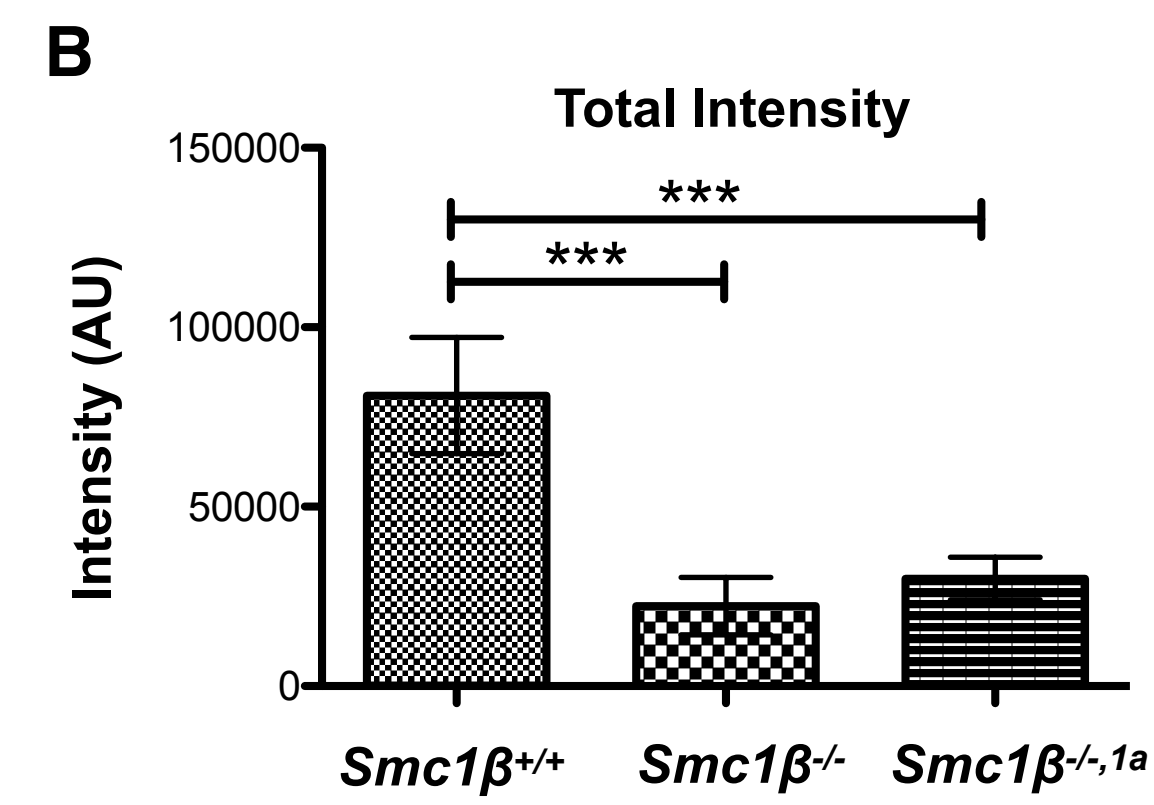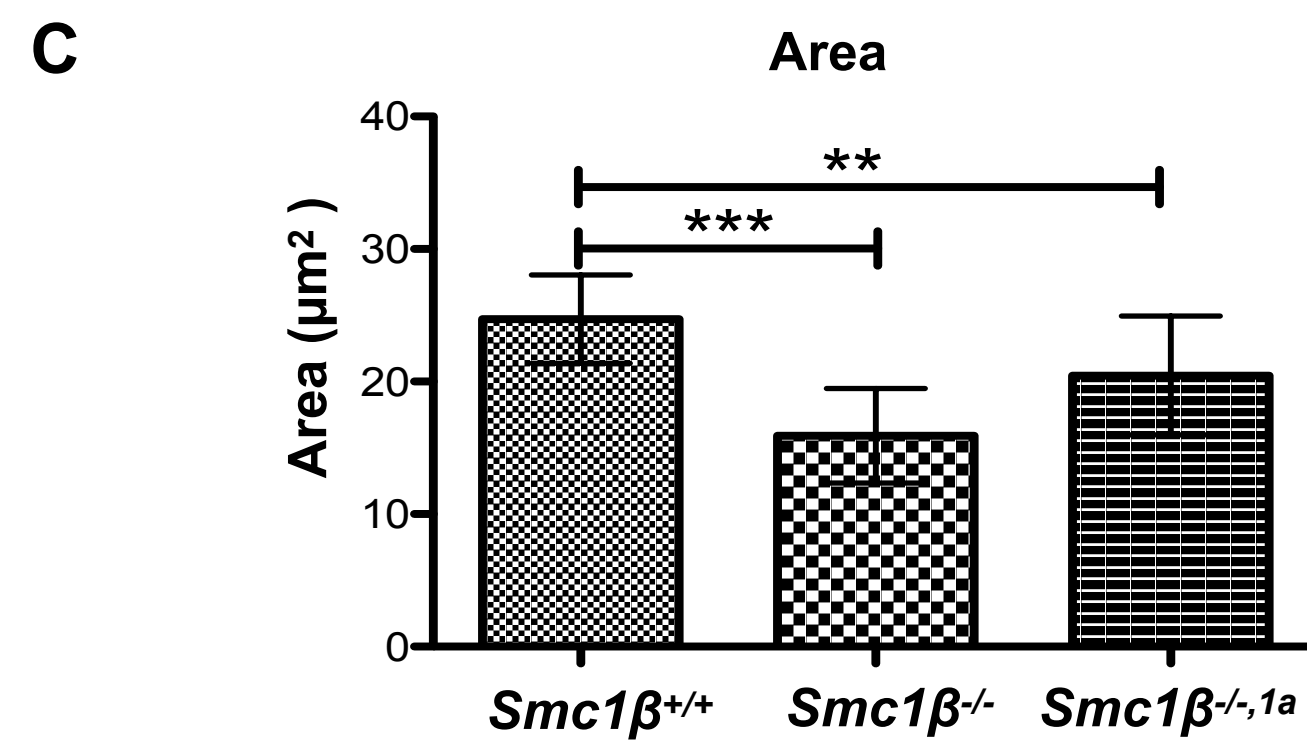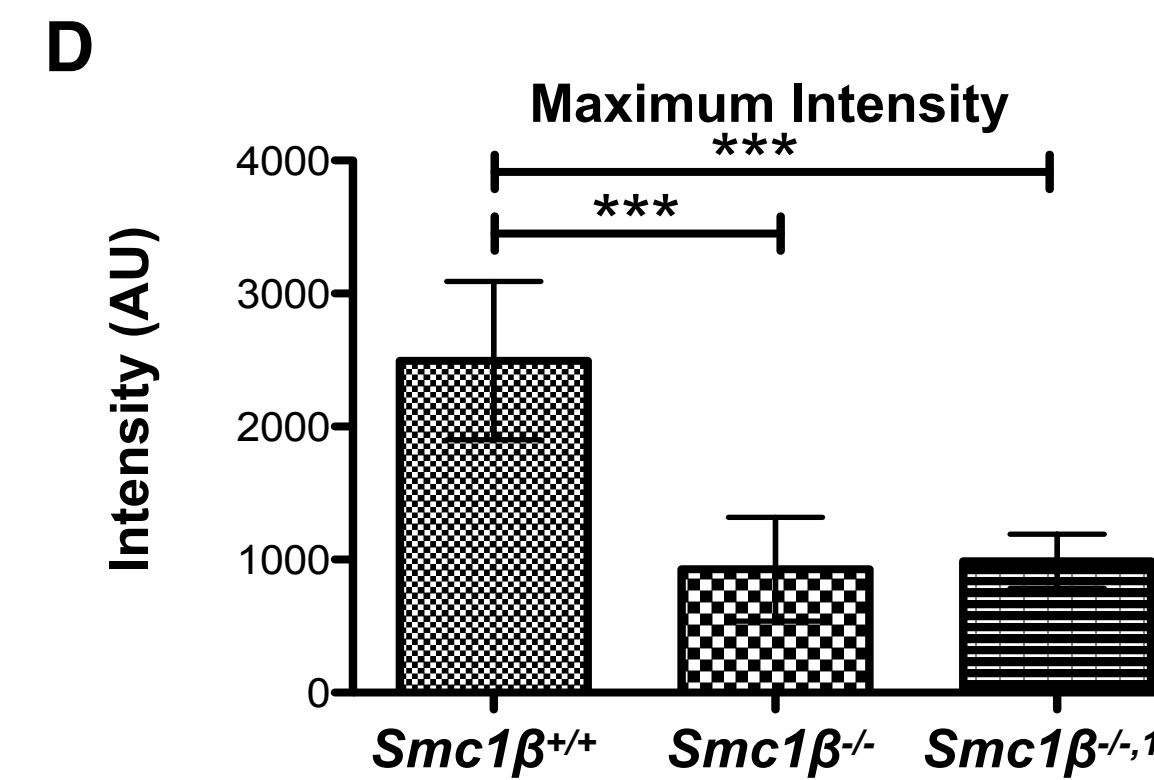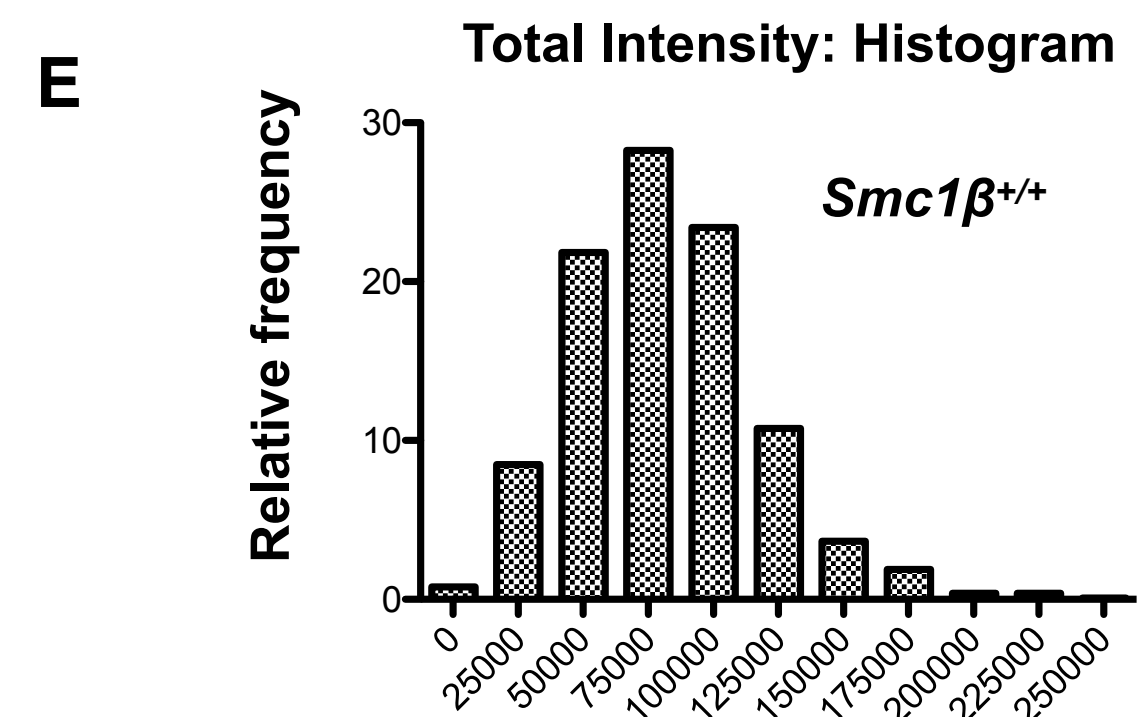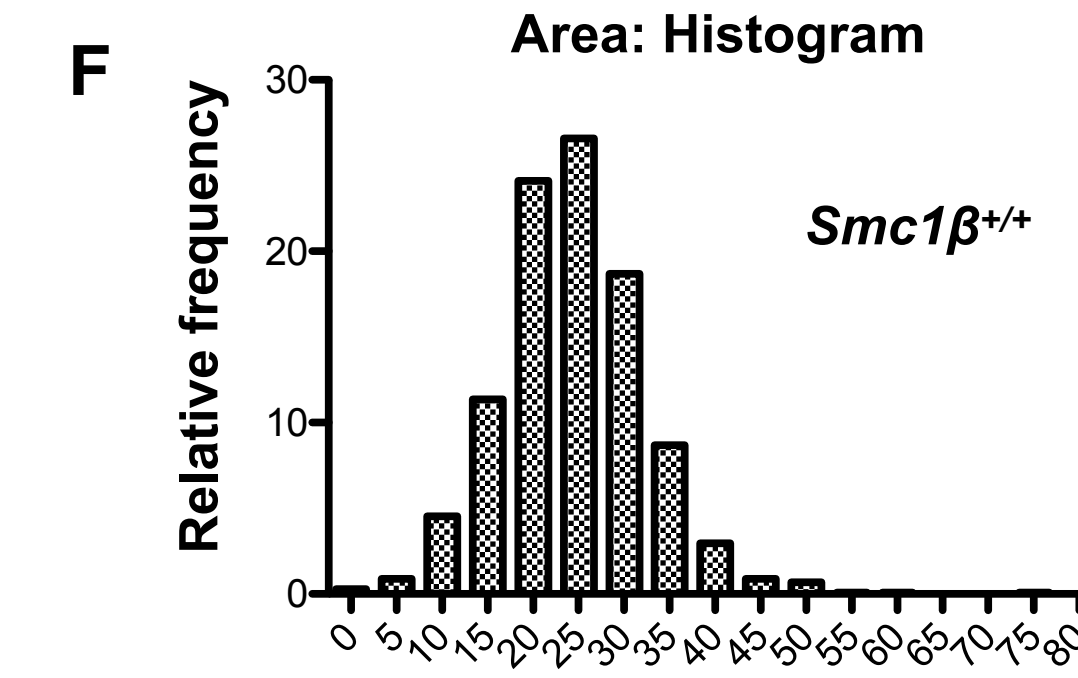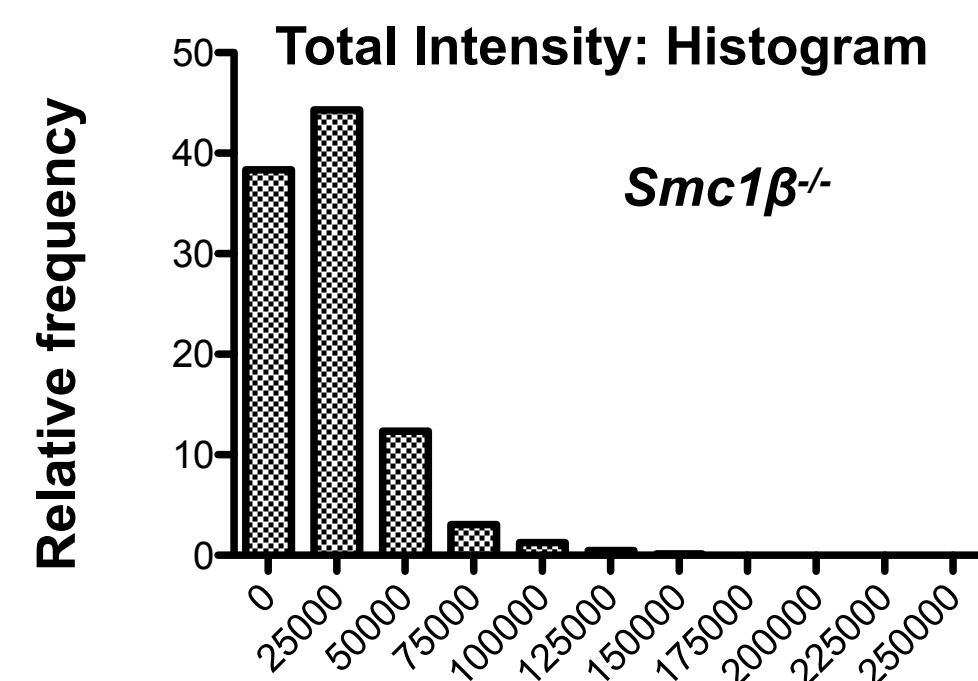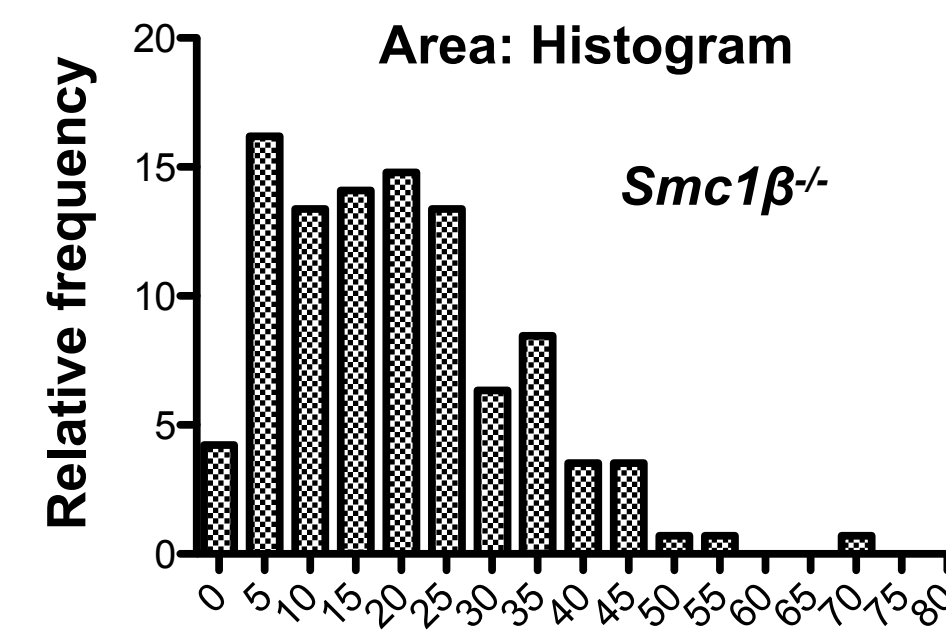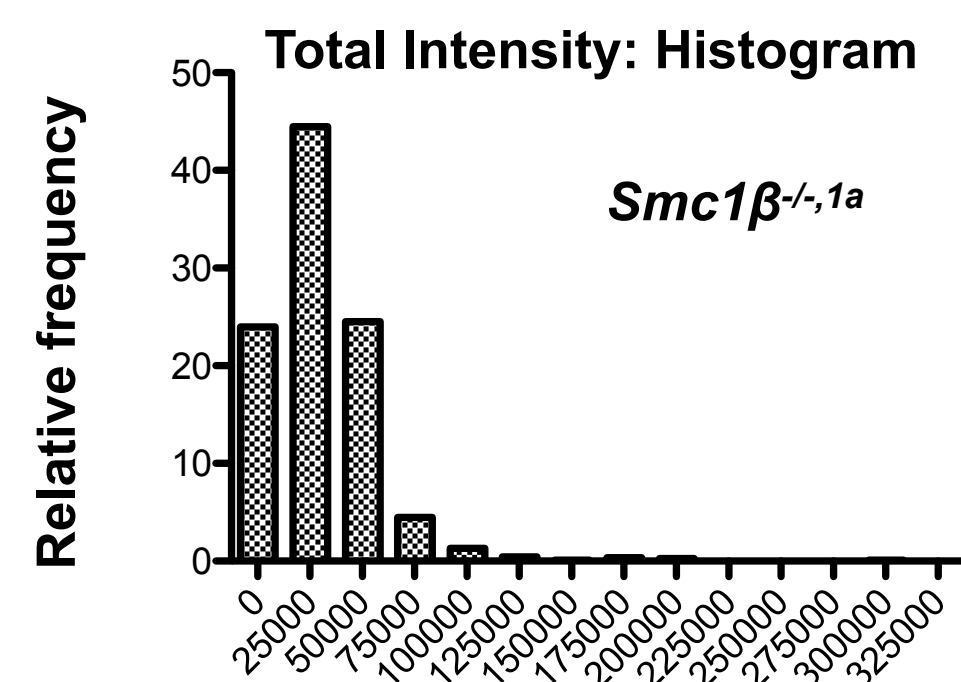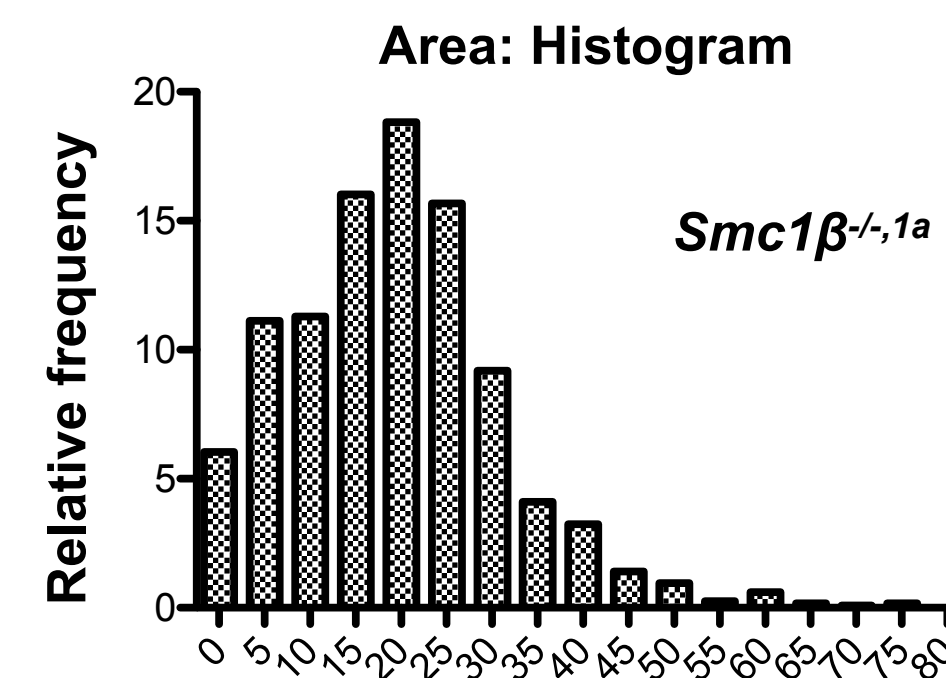

**Figure S6. Telomere analysis. Related to Figure 6.** (A) Average number of specific telomere aberrations and of all (overall) telomere aberrations per cell. The p-values reflect the difference between the two genotypes for each type of aberrations or overall. (B) Graphical representation of telomere length (Telo FISH signal intensity) of spermatocyte spreads as measured using the image J software; (*Smc1* $\beta^{+/+}$ : N=1012, number of telomeres, 80971 a.u. average total intensity (+/- 16217 SD); *Smc1* $\beta^{-/-}$ : N=623, 22279 (+/- 7974); *Smc1* $\beta^{-/-,1a}$ : N=1142, 29969 (+/- 5967)). The pairwise differences were not statistically relevant (p >0.05). (C) Graphical representation of telomere area (Telo FISH signal) of spermatocyte spreads measured using the image J software; (*Smc1* $\beta^{+/+}$ : N=1012, 24.72 (average area) (+/- 3.33 SD); *Smc1* $\beta^{-/-}$ : N=623, 15.89 (+/- 3.599); *Smc1* $\beta^{-/-,1a}$ : N=1142, 20.46 (+/- 4.483)). All pairwise differences were statistically relevant (p <0.05). (D) Graphical representation of maximum telomere intensity (Telo FISH signal) of spermatocyte spreads as measured using image J software; (*Smc1* $\beta^{+/+}$ : N=1012 telomeres, 2540 maximum intensity (+/- 840 SD); *Smc1* $\beta^{-/-}$ : N=623, 927 (+/- 577); *Smc1* $\beta^{-/-,1a}$ : N=1142, 1026 (+/- 470)). The pairwise differences were not statistically relevant (p >0.05). (E) and (F) Histogram of telomere length and telomere area distribution profiles of spermatocyte spreads as measured using image J software; (*Smc1* $\beta^{+/+}$ : N=1012, *Smc1* $\beta^{-/-}$ : N=623, *Smc1* $\beta^{-/-,1a}$ : N=1142). According to Chi-square analysis both telomere length and telomere area histogram profiles of *Smc1* $\beta^{+/+}$ , *Smc1* $\beta^{-/-}$  and *Smc1* $\beta^{-/-,1a}$  spermatocytes are statistically significantly different, p<0.00001.

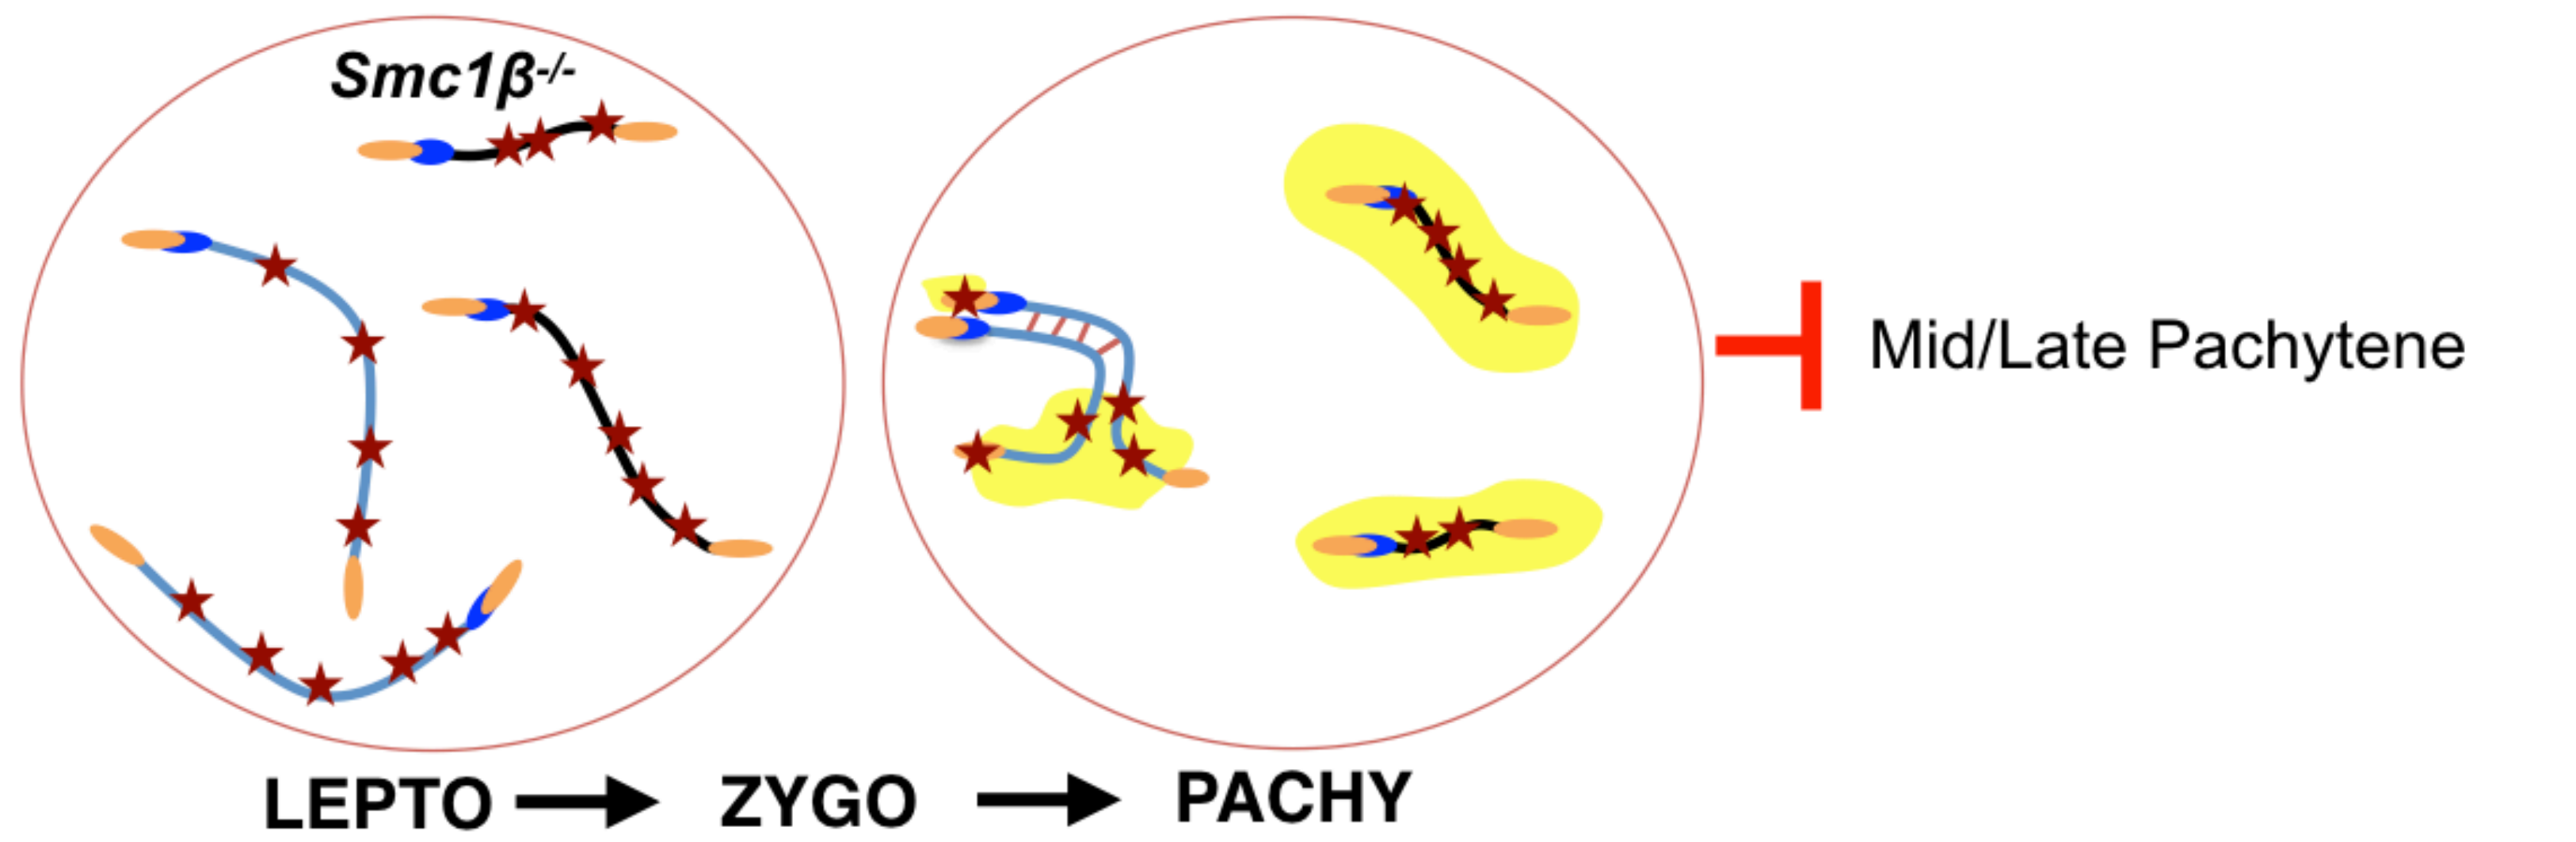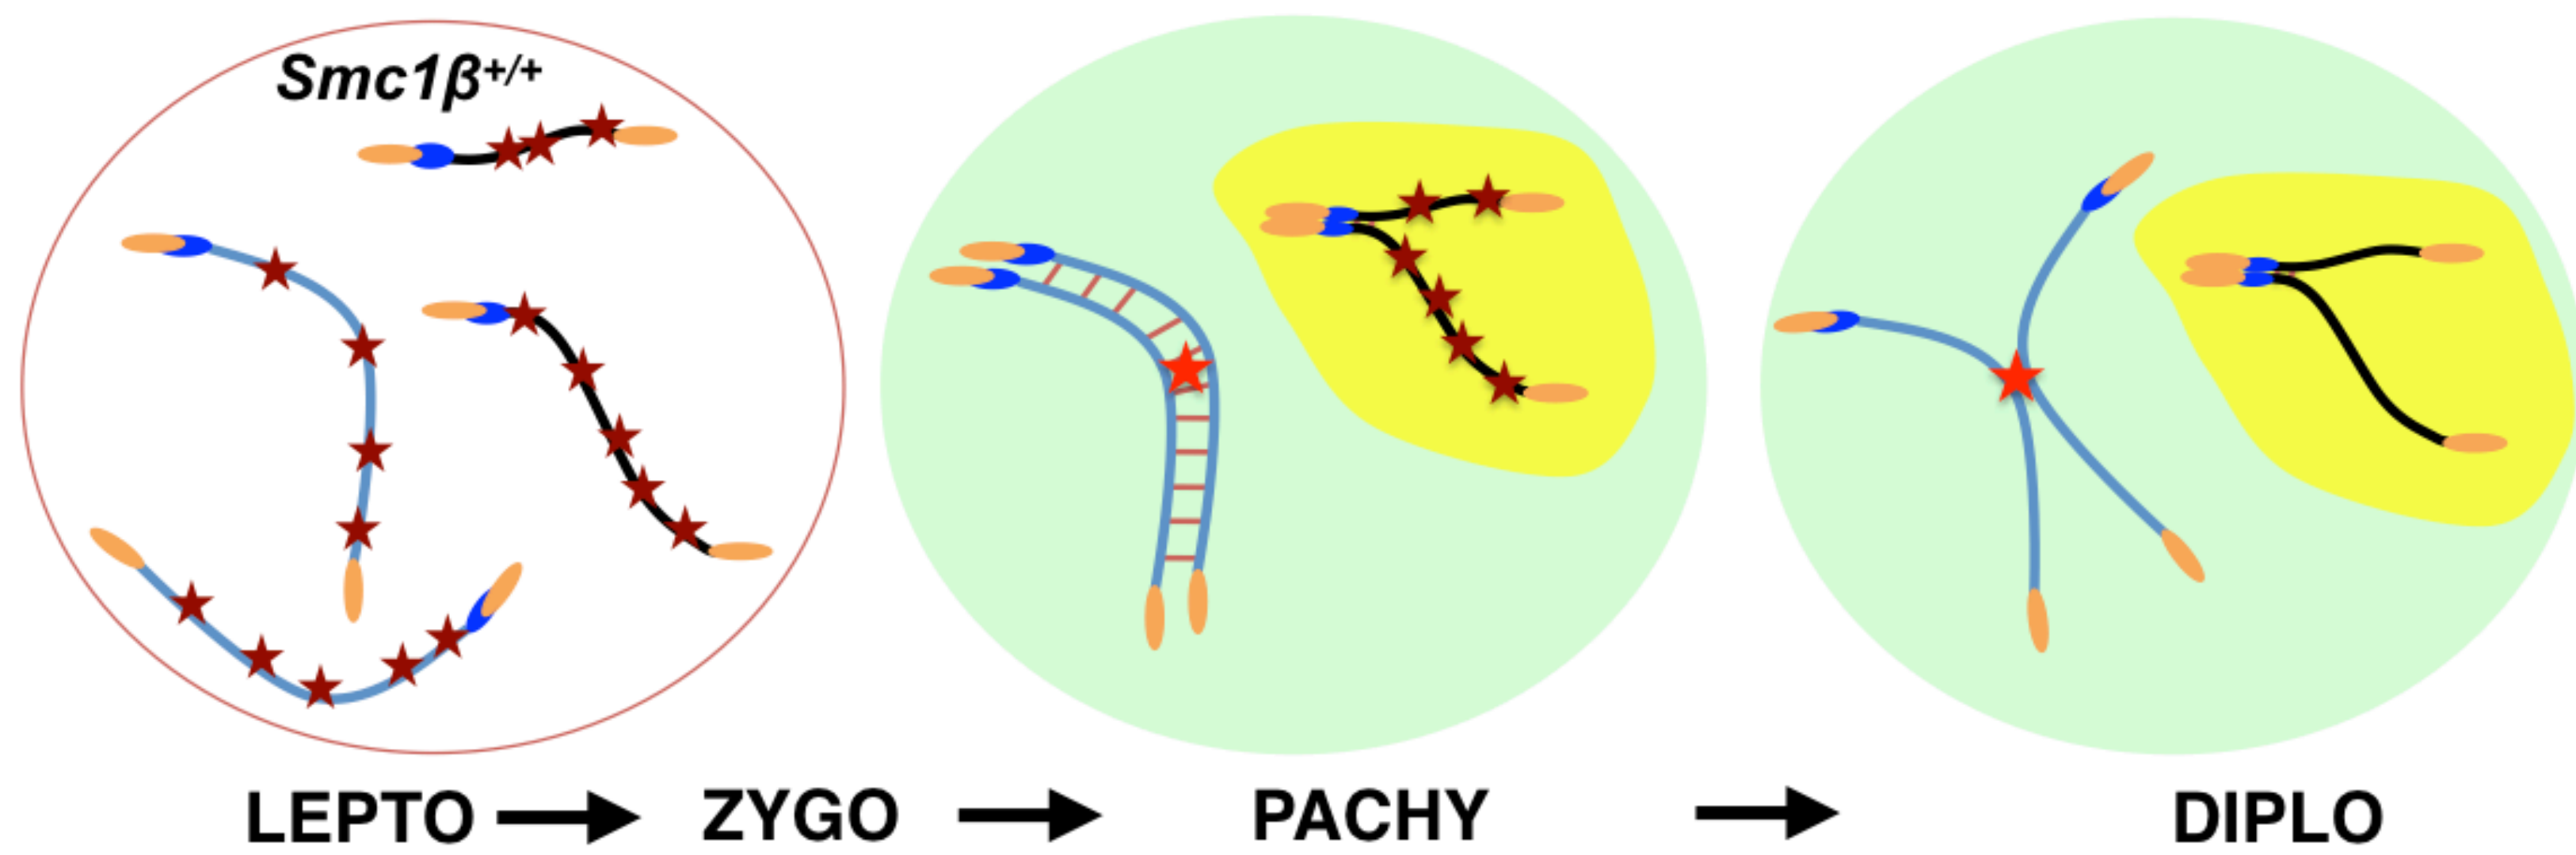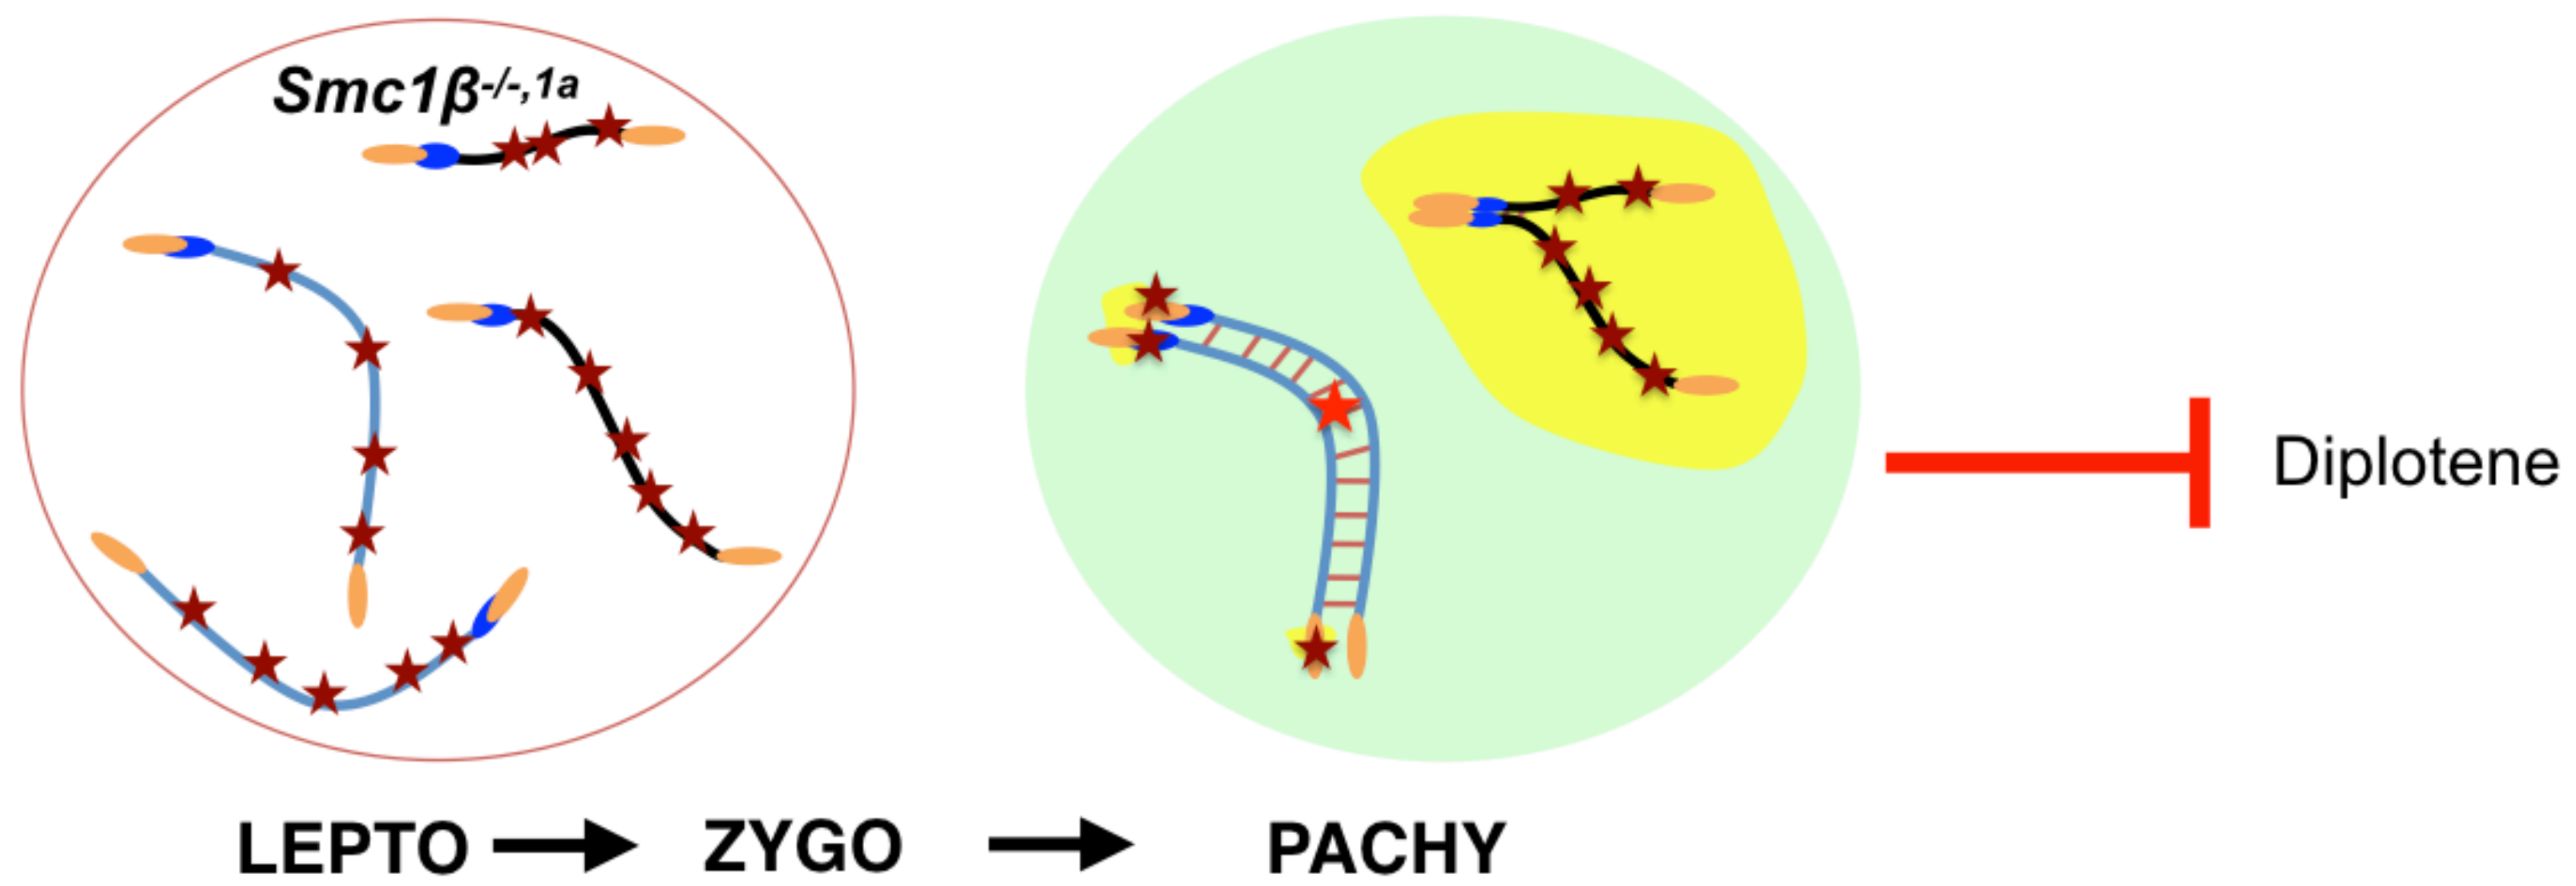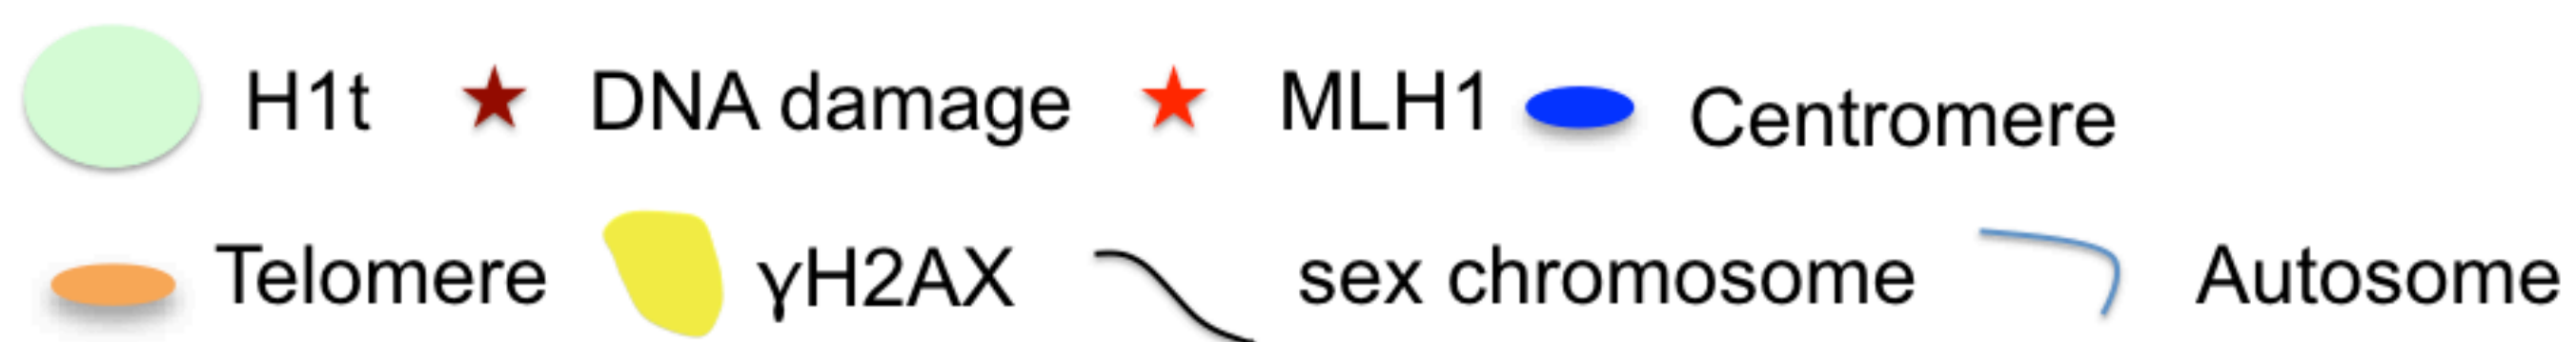

**Figure S7. Telomere analysis. Related to all Figures.** Summary model of the roles of SMC1 $\alpha$  and SMC1 $\beta$  in spermatocytes.
